# Supplementary material for: Concentration-dependent polymorphism of insulin amyloid fibrils
Source: PeerJ. 2019 Dec 10;7:e8208. doi: 10.7717/peerj.8208 (PMC6910113; doi:10.7717/peerj.8208)
Supplement: Supplemental Information 1 [file peerj-07-8208-s004.xlsx]

## Sheet: Unseeded aggregation
Time	0.2mM	0.2mM	0.2mM	0.2mM	0.4mM	0.4mM	0.4mM	0.4mM	0.6mM	0.6mM	0.6mM	0.6mM	0.8mM	0.8mM	0.8mM	0.8mM	1mM	1mM	1mM	1mM
0	99	127	120	4	84	198	88	158	0	133	202	124	92	98	64	126	88	144	295	144
10	50	62	0	86	207	93	0	63	0	47	59	0	89	81	104	203	0	75	0	83
20	60	71	0	13	179	81	28	152	0	21	66	0	96	54	0	32	0	45	93	17
30	104	13	24	72	72	146	0	17	0	153	55	108	28	105	80	102	192	144	208	166
40	60	66	84	87	0	150	0	53	195	248	77	0	77	168	124	0	171	81	118	30
50	43	56	14	20	18	114	0	0	0	143	50	48	31	0	205	104	95	126	87	125
60	88	116	42	64	107	94	169	20	0	84	77	139	23	148	253	83	1278	1831	1733	2962
70	94	1	74	13	140	7	83	15	43	252	174	92	437	580	1016	912	15782	17078	16294	21580
80	63	55	9	70	0	57	162	34	193	543	546	247	4249	4702	5629	5945	31153	31649	33426	34918
90	101	101	0	61	217	0	204	142	1778	2902	2149	2006	15538	16017	17664	18114	34138	34626	35868	36830
100	89	72	25	52	161	62	224	66	5679	6449	6346	6209	23260	22857	24513	24107	33920	34888	36633	37325
110	73	78	0	131	230	145	147	133	8735	7908	8484	8230	24646	25016	25955	26380	35513	36158	36956	37751
120	50	105	55	48	575	510	515	518	9095	8122	9041	8533	25879	25036	26079	26551	34420	35859	37072	37223
130	50	70	111	36	1435	1413	1409	1584	9205	8158	9099	8629	26050	25580	26847	26653	34813	36551	38132	37969
140	72	102	69	88	2217	2348	2279	2198	9497	8216	9171	8948	26119	25326	26307	27121	35177	36018	37256	37852
150	50	95	46	112	2429	2542	2388	2512	9414	8436	9296	8801	26318	25918	26385	26721	35221	35622	37532	37700
160	132	117	134	136	2475	2548	2563	2658	9406	8453	9194	8740	26058	25492	26397	27449	35827	36219	37532	37528
170	42	96	63	151	2645	2657	2600	2623	9685	8374	9343	9171	26689	25767	26679	27625	35625	35517	37459	38816
180	71	154	65	134	2690	2642	2674	2641	9659	8344	9288	9067	26625	26301	26405	27833	35767	36603	39105	38946
190	82	92	130	150	2542	2737	2699	2647	9611	8345	9275	8875	26446	26028	26830	27280	35407	36391	38056	39180
200	123	162	201	363	2740	2762	2736	2641	9821	8445	9201	9020	26840	25951	26791	27413	35735	37540	38411	39131
210	114	201	308	444	2806	2709	2617	2615	9828	8287	9354	9083	27202	26364	27322	27450	36394	37392	38623	38929
220	202	302	366	508	2680	2726	2620	2612	9619	8462	9415	9003	26612	26499	27281	27815	35556	36949	38330	39490
230	277	341	612	560	2608	2742	2556	2691	10005	8410	9175	9032	26898	26846	27340	27564	36619	36370	38268	38742
240	381	459	505	804	2684	2699	2643	2707	9657	8511	9559	9238	26741	26526	27771	28168	35988	37623	38226	39465
250	399	528	572	712	2897	2753	2703	2724	9700	8613	9402	9231	27608	26671	27566	28025	36579	37261	40120	39829
260	516	533	565	798	2848	2798	2735	2721	9980	8759	9199	9331	27349	26832	27832	28426	37413	37896	39393	40052
270	619	587	661	899	2836	2752	2737	2674	9804	8613	9521	9468	28022	27208	27746	28308	37226	37298	38585	40274
280	623	589	673	880	2934	2741	2719	2688	10059	8202	9470	9347	27009	27490	27892	27336	37171	38061	38687	40332
290	637	662	690	889	2731	2904	2638	2761	9946	8598	9302	9423	27695	27292	27981	27870	37469	37991	39405	40112
300	660	620	764	844	2737	2760	2758	2718	9915	8593	9433	9561	27060	26729	28685	28826	37604	36951	39062	40580
310	722	636	620	876	2725	2773	2642	2809	9826	8527	9601	9492	27578	26957	28645	29023	37566	37376	38849	40122
320	717	691	749	950	2787	2743	2728	2739	9710	8502	9615	9458	27431	26803	28594	28906	36880	38325	38884	40004
330	707	730	750	921	2794	2803	2694	2687	9395	8484	9327	9312	27600	26734	28026	28709	37308	38131	39144	39981
340	744	689	772	886	2809	2792	2736	2759	9680	8688	9477	9608	27776	27034	28351	28722	37730	38589	39463	40501
350	722	708	790	953	2719	2723	2658	2864	9661	8560	9532	9471	27769	26896	28606	28738	38407	38290	39495	40989
360	731	734	787	989	2746	2679	2739	2766	9968	8521	9349	9452	28043	27585	28050	28704	37255	38193	39798	40170
370	753	685	749	947	2829	2733	2720	2812	9940	8610	9253	9505	28508	27104	28454	28845	37767	38847	39621	40738
380	728	717	706	918	2675	2679	2672	2824	10020	8673	9426	9227	28594	27027	28451	28534	38128	38031	40179	41295
390	789	708	808	928	2701	2708	2597	2780	10054	8446	9281	9343	27933	27426	28259	28935	37498	38743	39104	40969
400	758	726	736	968	2690	2755	2688	2805	9946	8730	9255	9381	28095	27348	28441	29027	37790	38730	39900	39748

## Sheet: Seeded aggregation
1.0 -> 0.2																																	0.2 -> 0.2
Time	5%	5%	5%	5%	1%	1%	1%	1%	0.1%	0.1%	0.1%	0.1%	0.01%	0.01%	0.01%	0.01%	0.001%	0.001%	0.001%	0.001%	1E-4 %	1E-4 %	1E-4 %	1E-4 %	1E-5 %	1E-5 %	1E-5 %	1E-5 %	1E-6 %	1E-6 %	1E-6 %	1E-6 %	5%	5%	5%	5%	1%	1%	1%	1%	0.1%	0.1%	0.1%	0.1%	0.01%	0.01%	0.01%	0.01%	0.001%
0	1954	1958	1977	1943	466	433	450	427	118	68	131	132	114	101	100	127	107	94	77	122	125	167	110	65	128	176	121	130	74	86	115	123	523	519	471	489	183	192	180	159	105	157	125	119	127	115	105	157	116
10	3544	3584	3843	3413	515	568	587	513	100	125	171	113	61	147	86	82	29	87	48	89	64	34	102	51	53	55	80	75	34	102	66	78	597	507	600	817	187	156	169	162	90	83	94	112	63	81	126	56	2
20	5045	4793	5106	4818	1588	1395	1512	1501	121	166	169	189	72	84	87	55	87	102	59	23	130	78	31	53	84	87	111	63	76	72	89	84	979	872	960	1078	386	460	430	396	38	121	102	44	18	50	60	63	102
30	5682	5655	5869	5374	2356	2088	2440	2144	209	258	263	205	101	88	83	68	45	68	33	63	50	70	88	26	63	70	51	11	79	60	116	64	974	907	916	1050	754	726	802	774	223	184	151	206	75	81	80	65	89
40	5901	5945	5993	5698	2936	2785	3154	2801	423	333	308	422	130	105	55	91	52	71	24	64	62	100	94	88	2	76	77	90	80	71	72	41	924	938	899	1004	908	900	903	915	352	460	399	447	97	141	135	166	59
50	6139	6018	6263	6006	3552	3402	3510	3314	665	542	496	655	126	86	81	89	74	92	76	82	98	127	56	44	93	44	94	109	86	61	53	53	955	864	918	1044	963	954	952	946	615	716	675	716	292	268	426	395	33
60	6231	6347	6314	6114	4005	3785	4007	3577	950	848	772	951	190	200	167	140	61	82	117	56	82	77	152	89	61	83	11	33	81	27	119	47	964	914	895	984	983	903	1015	1010	875	878	811	850	618	501	791	688	153
70	6382	6413	6366	6159	4315	4102	4159	3880	1192	1089	970	1337	376	322	335	252	92	76	49	109	59	55	58	92	60	47	37	57	68	50	27	70	915	896	951	963	1011	1006	1008	1009	1025	910	906	969	784	687	1002	820	323
80	6456	6142	6384	6299	4353	4325	4175	3990	1565	1308	1261	1433	587	562	655	501	181	143	121	88	42	79	53	102	23	57	59	58	63	36	26	48	944	877	911	967	1049	1017	972	1036	1126	1000	1099	1048	911	889	1068	957	559
90	6418	6369	6453	6292	4427	4370	4370	4022	1639	1435	1617	1561	991	945	931	787	244	236	235	248	152	153	164	161	60	67	65	37	37	103	74	55	879	874	897	1017	1014	960	1054	1083	1089	1020	1194	1035	893	962	1123	998	759
100	6415	6526	6637	6338	4493	4599	4447	4136	1685	1553	1913	1590	1178	1145	1075	1041	406	404	376	428	217	317	287	205	122	83	98	43	65	62	64	32	900	837	920	1064	1020	959	1003	1028	1213	1003	1220	1050	1034	990	1246	1093	909
110	6482	6527	6563	6314	4557	4583	4480	4173	1814	1747	1884	1613	1196	1254	1139	1154	490	537	572	579	358	407	423	355	97	103	118	44	72	56	68	95	900	893	902	1005	980	956	1043	1116	1201	1091	1314	1089	1072	1036	1249	1022	932
120	6519	6550	6619	6367	4634	4724	4474	4183	1887	1657	1930	1787	1267	1223	1171	1197	585	653	660	675	458	427	431	438	172	176	185	96	114	84	119	32	936	880	957	968	978	1036	1076	1042	1210	1144	1322	1115	1025	1034	1310	1046	976
130	6446	6383	6647	6459	4664	4742	4526	4215	1932	1736	1869	1782	1270	1310	1195	1212	645	798	783	758	519	486	477	462	216	292	269	170	77	113	133	118	920	901	909	1017	992	977	1037	1029	1279	1071	1333	1126	1132	1062	1288	1122	1060
140	6646	6547	6757	6362	4633	4758	4646	4350	1863	1692	1840	1721	1281	1257	1230	1274	598	830	762	792	539	569	597	556	253	303	346	284	100	141	179	163	919	885	900	1055	999	1001	1035	1023	1359	1112	1434	1062	1073	1074	1302	1129	1085
150	6454	6452	6661	6521	4761	4790	4592	4271	1861	1732	1930	1807	1309	1311	1164	1247	765	878	853	917	515	584	552	538	338	355	460	315	189	242	181	239	929	879	934	1018	1015	1033	1064	1070	1357	1054	1379	1085	1086	1050	1271	1161	1109
160	6639	6686	6873	6501	4754	4636	4696	4400	1931	1743	1923	1779	1355	1347	1252	1347	743	917	850	937	600	631	607	621	412	483	466	430	272	301	316	274	931	926	963	955	989	1041	1034	1024	1359	1111	1417	1075	1144	1069	1348	1133	1159
170	6588	6660	6687	6462	4615	4741	4700	4354	2003	1715	1918	1826	1362	1395	1309	1376	813	964	856	907	661	643	645	617	455	587	566	514	341	398	421	345	923	911	902	1014	1009	1068	1116	1056	1428	1155	1495	1081	1145	1098	1325	1200	1104
180	6610	6580	6961	6544	4659	4670	4718	4239	1952	1753	1990	1830	1383	1355	1276	1419	768	990	892	970	632	669	700	660	522	613	529	572	569	468	484	458	957	867	922	993	1036	1101	1089	1056	1464	1161	1462	1134	1196	1141	1272	1150	1183
190	6673	6616	6767	6594	4696	4803	4781	4446	1939	1683	1853	1901	1383	1362	1238	1418	774	1024	893	904	700	666	682	657	549	682	636	637	609	540	592	560	945	900	958	1038	1078	1020	1037	1051	1353	1092	1456	1119	1143	1096	1326	1176	1156
200	6703	6524	6820	6573	4762	4743	4766	4310	1982	1694	1958	1893	1362	1337	1309	1381	808	1016	812	914	698	742	691	627	643	727	638	745	721	637	640	550	968	850	956	1008	1020	1055	1071	1039	1472	1121	1423	1098	1180	1072	1374	1170	1110
210	6506	6747	6647	6614	4672	4817	4766	4426	1998	1769	1920	1842	1399	1367	1275	1392	823	1034	875	930	694	726	718	662	693	763	661	881	798	643	668	581	974	894	962	1022	1062	1132	1035	1064	1423	1094	1497	1152	1244	1112	1351	1170	1115
220	6497	6689	6707	6611	4649	4733	4783	4390	1860	1799	1961	1791	1377	1340	1267	1409	833	1023	859	935	697	673	692	664	762	705	652	801	815	727	733	572	966	896	905	1012	988	1131	1150	1045	1419	1163	1459	1137	1224	1196	1345	1208	1154
230	6547	6604	6800	6661	4817	4817	4577	4493	2033	1769	1964	1969	1423	1264	1313	1434	856	1001	842	963	701	637	702	627	786	753	711	911	874	738	696	677	985	884	1024	1069	1060	1042	1068	1023	1395	1154	1515	1169	1227	1119	1386	1170	1195
240	6577	6689	6817	6573	4712	4927	4756	4379	1994	1770	1950	1903	1425	1345	1316	1469	884	984	927	921	680	682	683	696	864	769	676	937	901	809	761	641	888	927	885	1053	1001	1065	1137	1027	1376	1131	1426	1157	1219	1105	1346	1245	1218
250	6652	6643	7027	6628	4798	4672	4685	4320	1904	1770	1998	1901	1450	1325	1316	1475	841	1028	942	1023	756	759	639	644	867	751	709	958	894	834	844	688	943	933	961	1021	1015	1120	1105	1061	1411	1084	1533	1147	1194	1098	1356	1230	1192
260	6616	6746	6928	6544	4704	4778	4713	4208	2001	1822	2131	1931	1443	1339	1306	1438	836	1067	896	990	756	687	692	687	841	755	773	913	922	813	807	698	935	903	928	1014	1019	1092	1081	1046	1447	1136	1536	1124	1265	1175	1298	1196	1120
270	6580	6756	6863	6705	4787	4777	4629	4357	1991	1806	1975	1892	1391	1365	1257	1460	837	1079	891	930	728	685	697	684	868	724	756	931	904	854	794	637	923	899	970	1051	1066	1031	1029	1005	1410	1142	1518	1168	1215	1168	1346	1191	1238
280	6428	6698	6908	6662	4816	4778	4744	4303	1959	1789	2033	1888	1501	1393	1380	1485	830	1075	821	927	712	683	702	623	860	793	757	1045	901	818	760	638	966	907	910	979	1082	1096	1058	1049	1429	1124	1558	1146	1298	1217	1368	1232	1218
290	6581	6678	6962	6612	4875	4785	4703	4463	1932	1842	2058	1902	1543	1424	1308	1465	885	1004	859	935	701	703	670	638	944	723	753	938	987	837	790	695	930	878	946	1003	1050	1122	1065	1095	1417	1138	1521	1085	1251	1116	1352	1230	1253
300	6438	6596	6831	6582	4821	4853	4759	4418	2028	1823	2069	1839	1548	1398	1310	1396	886	1095	909	935	675	756	718	698	908	776	752	956	936	821	753	669	994	937	920	1009	1153	1149	1071	988	1428	1091	1541	1083	1275	1154	1384	1244	1231
310																																	1026	934	953	986	1104	1143	1094	1065	1388	1097	1522	1148	1261	1169	1411	1246	1202
320																																	909	960	951	951	1086	1133	1048	1068	1432	1224	1532	1128	1235	1144	1452	1288	1233
330																																	949	861	971	1017	1086	1072	1103	1081	1401	1135	1633	1201	1272	1159	1361	1226	1192
340																																	978	843	955	1079	1087	1126	1114	1054	1395	1156	1507	1213	1275	1144	1407	1249	1169
350																																	952	856	957	985	1094	1103	1131	1078	1405	1155	1589	1162	1230	1125	1410	1240	1260
[truncated: 79 more columns]
