# Supplementary material for: Concentration-dependent polymorphism of insulin amyloid fibrils
Source: PeerJ. 2019 Dec 10;7:e8208. doi: 10.7717/peerj.8208 (PMC6910113; doi:10.7717/peerj.8208)
Supplement: Supplemental Information 2 [file peerj-07-8208-s005.xlsx]

## Sheet: Sheet1
	Monomer solution concentration + Fibril solution (initial concentration and percentage used as seed)
n	0.2	0.4	0.6	0.8	1	0.2 + 0.2 5%	0.2 + 0.2 0.0001%	0.2 + 1 5%	0.2 + 1.0 0.0001%	1.0 + 0.2 5%	1.0 + 1.0 5%	1.0 + 0.2 0.0001%	1.0 + 1.0 0.0001%	0.2 + 0.2 5%	0.2 + 0.2 0.0001%	0.2 + 1.0 5%	0.2 + 1.0 0.0001%	1.0 + 0.2 5%	1.0 + 1.0 5%	1.0 + 0.2 0.0001%	1.0 + 1.0 0.0001%
1	5.69	5.27	3.86	3.79	7.74	9.27	3.9	5.64	8.12	7.96	3.97	3.39	3.06	9.27	3.9	5.64	8.12	7.96	3.97	3.39	3.06
2	10.9	4.13	4.25	8.87	9.84	4.73	5.64	4.15	5	9.35	4.64	6.78	4.62	4.73	5.64	4.15	5	9.35	4.64	6.78	4.62
3	6.13	8.26	2.68	8.81	5.26	7.77	5.25	8.11	5.16	5.58	5.68	6.29	7.05	7.77	5.25	8.11	5.16	5.58	5.68	6.29	7.05
4	4.83	11.5	6.54	13	7.89	6.49	4.91	6.84	5.45	4.92	3.83	4.2	9.07	6.49	4.91	6.84	5.45	4.92	3.83	4.2	9.07
5	3.91	4.82	6.94	4.34	5.95	6.6	4.99	7.26	6.46	9.14	5.71	3.78	10.1	6.6	4.99	7.26	6.46	9.14	5.71	3.78	10.1
6	4.41	7.42	3.92	10.4	10.5	6.68	7.27	5.4	8.93	4.27	4.11	4.46	6.86	6.68	7.27	5.4	8.93	4.27	4.11	4.46	6.86
7	6.17	2.89	4.22	7.69	5.63	7.67	8.04	7.57	5.24	6.1	7.05	5.96	8.53	7.67	8.04	7.57	5.24	6.1	7.05	5.96	8.53
8	5.32	3.89	5	7.95	4.41	6.05	8.48	4.31	6.51	8.78	7.57	6.41	7.02	6.05	8.48	4.31	6.51	8.78	7.57	6.41	7.02
9	5.61	3.72	7.93	8.11	9.94	3.96	5.24	3.78	8.21	6.47	6.87	4.45	8	3.96	5.24	3.78	8.21	6.47	6.87	4.45	8
10	4.57	6.13	4.03	6.32	12.3	4.19	3.63	4.95	7.51	3.88	5.35	7.07	5.3	4.19	3.63	4.95	7.51	3.88	5.35	7.07	5.3
11	4.88	7.21	4.46	5.13	4.54	4.4	5.19	10.5	10.6	4.18	4.8	9.21	3.42	4.4	5.19	10.5	10.6	4.18	4.8	9.21	3.42
12	4.39	9.74	7.39	9.69	12.2	3.68	6.16	10.7	5	6.18	9.38	8.26	5.21	3.68	6.16	10.7	5	6.18	9.38	8.26	5.21
13	8.31	2.88	6.91	9.45	5.9	3.78	7.62	4.42	4.31	4.18	8.46	5.89	5.65	3.78	7.62	4.42	4.31	4.18	8.46	5.89	5.65
14	9.23	5.49	6.17	11.3	4.62	7.02	4.62	6.87	4.67	6.17	10.2	9.19	11.9	7.02	4.62	6.87	4.67	6.17	10.2	9.19	11.9
15	5.87	6.46	7.4	8.57	6.9	4.96	7.2	5.27	2.85	4.67	6.11	6.03	7.05	4.96	7.2	5.27	2.85	4.67	6.11	6.03	7.05
16	4.8	2.99	5.24	4.76	6.07	6.36	3.47	15.7	4.43	4.44	7.32	6.92	7.56	6.36	3.47	15.7	4.43	4.44	7.32	6.92	7.56
17	5.2	6.25	2.74	3.15	8.77	7.36	6.97	9.21	4.72	5.5	6.62	5.59	9.96	7.36	6.97	9.21	4.72	5.5	6.62	5.59	9.96
18	5.17	9.57	5.48	6.46	4.8	10	6.21	4.14	5.13	5.23	6.95	6.06	12.4	10	6.21	4.14	5.13	5.23	6.95	6.06	12.4
19	4.49	2.99	4.79	4.08	6.85	6.14	7.5	4.07	7.69	8.47	4.39	6.23	6.67	6.14	7.5	4.07	7.69	8.47	4.39	6.23	6.67
20	2.96	6.88	8.27	8.21	4.18	5.75	8.66	13	6.83	7.45	7.33	7.98	4.53	5.75	8.66	13	6.83	7.45	7.33	7.98	4.53
21	4.37	4.49	8.86	5.41	5.2	6.18	7.66	4.68	3.7	4.03	4.25	5.71	9.95	6.18	7.66	4.68	3.7	4.03	4.25	5.71	9.95
22	6.16	3.8	9.92	6.73	6.32	9.24	5.96	4.87	4.41	6.42	7.38	6.14	8.3	9.24	5.96	4.87	4.41	6.42	7.38	6.14	8.3
23	6.54	3.49	4.74	5.39	9.81	5.48	7.3	4.49	3.32	9.51	7.36	7.44	7.78	5.48	7.3	4.49	3.32	9.51	7.36	7.44	7.78
24	5.38	5.23	11.5	8.94	6.19	7.56	8.69	6.84	9.58	6.01	11.1	7.93	6.42	7.56	8.69	6.84	9.58	6.01	11.1	7.93	6.42
25	4.61	4.1	7.43	3.04	12.01	6.09	7.2	4.75	5.15	5.4	7.98	4.22	4.19	6.09	7.2	4.75	5.15	5.4	7.98	4.22	4.19
26	4.69	4.82	4.11	8.21	3.66	2.77	5.8	5.75	10.8	5.24	5.73	5.32	7.28	2.77	5.8	5.75	10.8	5.24	5.73	5.32	7.28
27	6.17	6.1	8.84	5.32	3.63	6.02	5.95	8.1	4.76	3.8	6.13	4.81	6.76	6.02	5.95	8.1	4.76	3.8	6.13	4.81	6.76
28	3.52	3.43	4.92	10.3	6.93	8.12	4.15	11.3	7.03	4.5	3.11	8.31	7.25	8.12	4.15	11.3	7.03	4.5	3.11	8.31	7.25
29	5.72	4.62	7.08	6.22	3.89	5.33	5.37	7.49	5.97	4.41	3.18	8.93	6.64	5.33	5.37	7.49	5.97	4.41	3.18	8.93	6.64
30	6.63	4.97	4.75	4.82	5.84	3.24	8.29	5.72	5.33	3.09	4.19	7.71	5.11	3.24	8.29	5.72	5.33	3.09	4.19	7.71	5.11
31	4.35	5.14	4.61	7.8	7.38	8.42	7.64	6.2	4.47	8.43	4.27	5.07	9.44	8.42	7.64	6.2	4.47	8.43	4.27	5.07	9.44
32	6.56	6.44	4.87	7.38	9.44	3.77	4.5	4.46	4.94	6.35	12.7	7.34	11.3	3.77	4.5	4.46	4.94	6.35	12.7	7.34	11.3
33	4.53	8.32	6.91	4.25	7.7	6.25	5.28	4.63	4.3	5.47	6.46	6.97	4.29	6.25	5.28	4.63	4.3	5.47	6.46	6.97	4.29
34	5.31	4.72	4.21	5.79	6.35	10.7	7.71	4.69	6.52	7.41	5.33	9.28	3.46	10.7	7.71	4.69	6.52	7.41	5.33	9.28	3.46
35	5.5	6.67	3.32	12.8	8.41	5.74	9.63	13.7	7.17	7.44	6.83	6.65	7.16	5.74	9.63	13.7	7.17	7.44	6.83	6.65	7.16
36	6.01	7.32	8.93	7.68	10.4	6.84	7.54	6.98	5.52	11.6	6.09	7.77	9.41	6.84	7.54	6.98	5.52	11.6	6.09	7.77	9.41
37	2.01	4.26	6.9	5.37	12.9	2.81	3.68	6.46	5.94	4.06	5.31	8.05	7.56	2.81	3.68	6.46	5.94	4.06	5.31	8.05	7.56
38	3.4	4.21	3.34	7.45	5.97	4.11	5.7	12.3	7.1	4.24	5.66	5.29	11.5	4.11	5.7	12.3	7.1	4.24	5.66	5.29	11.5
39	2.8	3.5	6.34	4.94	8.02	6.37	7.31	4.43	5.81	7.76	7.03	6.68	4.39	6.37	7.31	4.43	5.81	7.76	7.03	6.68	4.39
40	5.5	2.55	3.54	7.05	6.64	3.74	3.51	5.63	7.1	2.75	7.22	9.64	8.16	3.74	3.51	5.63	7.1	2.75	7.22	9.64	8.16
41	4.04	3.84	6.51	4.45	5.98	8.4	5.46	3.27	4.88	8.24	4.65	5.34	10.7	8.4	5.46	3.27	4.88	8.24	4.65	5.34	10.7
42	6.95	6.44	3.88	4.93	5.62	8.3	6.09	8.22	5.38	3.97	4.35	8.66	9.08	8.3	6.09	8.22	5.38	3.97	4.35	8.66	9.08
43	4.32	2.91	2.29	3.56	8.14	4.94	3.97	5.31	9.31	6.49	9.41	9.08	8.71	4.94	3.97	5.31	9.31	6.49	9.41	9.08	8.71
44	5.51	8.57	3.44	5.26	7.93	3.31	4.94	3.55	6.8	6.46	5.65	4.29	4.52	3.31	4.94	3.55	6.8	6.46	5.65	4.29	4.52
45	3.59	5.45	6.49	5.48	6.67	5.1	7.73	5.77	4.53	7.59	7.43	11.5	4.74	5.1	7.73	5.77	4.53	7.59	7.43	11.5	4.74
46	4.58	3.14	8.29	3.7	6.24	7.19	4.04	5.08	2.38	3.6	8.22	11.4	5.01	7.19	4.04	5.08	2.38	3.6	8.22	11.4	5.01
47	4.77	2.71	4.21	6.47	4.87	3.34	6.47	4.34	7.76	5.25	8.49	4.23	4.48	3.34	6.47	4.34	7.76	5.25	8.49	4.23	4.48
48	4.74	4.13	6.53	2.97	7.06	4.62	7.08	7.33	7.45	7.62	4.34	4.98	4.39	4.62	7.08	7.33	7.45	7.62	4.34	4.98	4.39
49	3.08	5.13	9.21	5.25	5.01	6.23	5.9	3.72	5.04	7.07	5.78	6.9	4.87	6.23	5.9	3.72	5.04	7.07	5.78	6.9	4.87
50	5.65	2.73	3.76	6.99	5.15	6.21	5.91	3.05	9.59	6.86	6.77	5.77	4.58	6.21	5.91	3.05	9.59	6.86	6.77	5.77	4.58
