# Supplementary material for: Concentration-dependent polymorphism of insulin amyloid fibrils
Source: PeerJ. 2019 Dec 10;7:e8208. doi: 10.7717/peerj.8208 (PMC6910113; doi:10.7717/peerj.8208)
Supplement: Supplemental Information 3 [file peerj-07-8208-s006.xlsx]

## Sheet: Absorption
Wavenumber	0,2 mM	0,4 mM	0,6 mM	0,8 mM	1,0 mM			Wavenumber	0,2 mM	1,0 mM	0,2 -> 0,2 5%	1,0 -> 0,2 5%	0,2 -> 1,0 5%	1,0 -> 1,0 5%		Wavenumber	0,2 mM	1,0 mM	0,2 -> 0,2 0,0001%	1,0 -> 0,2 0,0001%	0,2 -> 1,0 0,0001%	1,0 -> 1,0 Lg-3
1750.06	-0.000222308	-0.00111693	-0.00104027	-0.00135646	-0.000876004			1750.06	-0.000222308	-0.000876004	-0.00110882	-0.00142504	-0.00141251	-0.00166998		1750.06	-0.000222308	-0.000876004	-0.000461448	0.000178219	-0.000780478	-0.000509843
1749.74	-0.000194829	-0.00110876	-0.00103396	-0.00135016	-0.000869797			1749.74	-0.000194829	-0.000869797	-0.00109925	-0.00141737	-0.00140572	-0.00166366		1749.74	-0.000194829	-0.000869797	-0.00045648	0.000186832	-0.000775106	-0.000504081
1749.41	-0.000167262	-0.00110022	-0.00102744	-0.00134354	-0.000863324			1749.41	-0.000167262	-0.000863324	-0.00108951	-0.00140962	-0.0013987	-0.00165708		1749.41	-0.000167262	-0.000863324	-0.000451631	0.000195713	-0.000769412	-0.00049824
1749.09	-0.000139695	-0.00109135	-0.00102075	-0.00133656	-0.000856558			1749.09	-0.000139695	-0.000856558	-0.00107957	-0.00140178	-0.0013914	-0.00165024		1749.09	-0.000139695	-0.000856558	-0.000446935	0.000204988	-0.000763408	-0.000492448
1748.77	-0.000112336	-0.00108215	-0.00101396	-0.0013292	-0.0008496			1748.77	-0.000112336	-0.0008496	-0.00106944	-0.00139359	-0.00138388	-0.00164311		1748.77	-0.000112336	-0.0008496	-0.000442226	0.000214796	-0.000757107	-0.00048668
1748.45	-8.53146e-05	-0.00107264	-0.00100702	-0.00132145	-0.000842421			1748.45	-8.53146e-05	-0.000842421	-0.00105908	-0.00138496	-0.00137608	-0.00163561		1748.45	-8.53146e-05	-0.000842421	-0.000437411	0.000225159	-0.000750528	-0.000480798
1748.13	-5.8794e-05	-0.00106285	-0.000999967	-0.00131329	-0.000835067			1748.13	-5.8794e-05	-0.000835067	-0.00104854	-0.00137586	-0.00136807	-0.00162776		1748.13	-5.8794e-05	-0.000835067	-0.000432348	0.000236054	-0.000743791	-0.000474653
1747.81	-3.26748e-05	-0.00105275	-0.000992699	-0.00130472	-0.000827481			1747.81	-3.26748e-05	-0.000827481	-0.00103779	-0.00136614	-0.00135978	-0.00161952		1747.81	-3.26748e-05	-0.000827481	-0.000426714	0.000247482	-0.000736903	-0.000467889
1747.49	-7.14039e-06	-0.0010424	-0.00098525	-0.00129576	-0.000819713			1747.49	-7.14039e-06	-0.000819713	-0.00102694	-0.00135593	-0.00135125	-0.00161096		1747.49	-7.14039e-06	-0.000819713	-0.000420601	0.000259098	-0.000729997	-0.000460607
1747.16	1.78298e-05	-0.00103184	-0.000977584	-0.00128645	-0.000811771			1747.16	1.78298e-05	-0.000811771	-0.00101605	-0.00134534	-0.00134247	-0.00160207		1747.16	1.78298e-05	-0.000811771	-0.000413985	0.000270688	-0.000723091	-0.000452763
1746.84	4.23642e-05	-0.00102107	-0.000969616	-0.00127677	-0.00080353			1746.84	4.23642e-05	-0.00080353	-0.00100513	-0.00133431	-0.00133338	-0.00159285		1746.84	4.23642e-05	-0.00080353	-0.000407016	0.000282101	-0.000716116	-0.000444459
1746.52	6.636e-05	-0.00101017	-0.000961435	-0.00126676	-0.000795073			1746.52	6.636e-05	-0.000795073	-0.000994197	-0.00132306	-0.00132401	-0.00158332		1746.52	6.636e-05	-0.000795073	-0.000399959	0.000293102	-0.000709052	-0.000435867
1746.2	8.97684e-05	-0.000999144	-0.000953043	-0.00125643	-0.000786298			1746.2	8.97684e-05	-0.000786298	-0.000983233	-0.00131164	-0.00131439	-0.0015735		1746.2	8.97684e-05	-0.000786298	-0.000393039	0.000303457	-0.00070183	-0.00042711
1745.88	0.000112551	-0.00098805	-0.000944402	-0.00124574	-0.000777183			1745.88	0.000112551	-0.000777183	-0.000972211	-0.00130016	-0.00130456	-0.00156334		1745.88	0.000112551	-0.000777183	-0.000386424	0.000313108	-0.00069436	-0.00041819
1745.56	0.000134536	-0.000976902	-0.000935538	-0.00123471	-0.000767748			1745.56	0.000134536	-0.000767748	-0.000961127	-0.00128867	-0.00129459	-0.00155287		1745.56	0.000134536	-0.000767748	-0.000380248	0.000321873	-0.000686648	-0.000409161
1745.24	0.000155739	-0.000965657	-0.000926411	-0.00122329	-0.000758002			1745.24	0.000155739	-0.000758002	-0.000949949	-0.00127715	-0.00128451	-0.00154209		1745.24	0.000155739	-0.000758002	-0.000374317	0.000329796	-0.000678705	-0.00039998
1744.91	0.000176058	-0.000954312	-0.000916985	-0.0012115	-0.000747999			1744.91	0.000176058	-0.000747999	-0.000938689	-0.0012655	-0.00127436	-0.00153104		1744.91	0.000176058	-0.000747999	-0.000368557	0.000336898	-0.000670587	-0.000390659
1744.59	0.000195536	-0.000942804	-0.000907215	-0.00119933	-0.000737752			1744.59	0.000195536	-0.000737752	-0.000927302	-0.00125371	-0.00126412	-0.00151975		1744.59	0.000195536	-0.000737752	-0.000362631	0.000343338	-0.000662318	-0.000381227
1744.27	0.000214179	-0.000931088	-0.000897112	-0.0011868	-0.000727309			1744.27	0.000214179	-0.000727309	-0.000915824	-0.00124153	-0.00125373	-0.00150819		1744.27	0.000214179	-0.000727309	-0.000356239	0.000349492	-0.000653945	-0.000371655
1743.95	0.000232099	-0.00091908	-0.00088661	-0.00117394	-0.000716637			1743.95	0.000232099	-0.000716637	-0.000904168	-0.00122888	-0.00124307	-0.0014963		1743.95	0.000232099	-0.000716637	-0.000349121	0.000355706	-0.000645442	-0.000361979
1743.63	0.000249248	-0.000906733	-0.000875749	-0.00116078	-0.000705747			1743.63	0.000249248	-0.000705747	-0.000892334	-0.00121561	-0.00123213	-0.001484		1743.63	0.000249248	-0.000705747	-0.000341221	0.000362298	-0.000636867	-0.00035214
1743.31	0.000265622	-0.000894026	-0.000864428	-0.00114731	-0.000694516			1743.31	0.000265622	-0.000694516	-0.000880191	-0.00120165	-0.00122078	-0.00147113		1743.31	0.000265622	-0.000694516	-0.000332512	0.000369539	-0.000628008	-0.000342043
1742.99	0.000281191	-0.00088096	-0.000852728	-0.00113354	-0.000683008			1742.99	0.000281191	-0.000683008	-0.000867793	-0.00118702	-0.00120908	-0.0014576		1742.99	0.000281191	-0.000683008	-0.000323128	0.000377515	-0.000618934	-0.000331623
1742.66	0.000295842	-0.000867601	-0.000840606	-0.00111949	-0.000671083			1742.66	0.000295842	-0.000671083	-0.000855122	-0.00117173	-0.00119698	-0.00144333		1742.66	0.000295842	-0.000671083	-0.000313251	0.000386037	-0.000609501	-0.000320833
1742.34	0.00030933	-0.000854044	-0.000828201	-0.00110518	-0.000658912			1742.34	0.00030933	-0.000658912	-0.000842306	-0.00115617	-0.00118463	-0.00142843		1742.34	0.00030933	-0.000658912	-0.000303169	0.000394539	-0.000599801	-0.000309797
1742.02	0.000321629	-0.000840368	-0.000815473	-0.0010906	-0.000646545			1742.02	0.000321629	-0.000646545	-0.000829416	-0.00114044	-0.00117203	-0.00141297		1742.02	0.000321629	-0.000646545	-0.000293104	0.000402508	-0.000589832	-0.000298705
1741.7	0.000332578	-0.000826667	-0.00080256	-0.00107576	-0.000634101			1741.7	0.000332578	-0.000634101	-0.000816587	-0.00112482	-0.00115924	-0.00139714		1741.7	0.000332578	-0.000634101	-0.000283256	0.000409502	-0.000579689	-0.000287722
1741.38	0.000342121	-0.000812979	-0.000789507	-0.0010607	-0.000621804			1741.38	0.000342121	-0.000621804	-0.000803951	-0.00110956	-0.00114631	-0.00138108		1741.38	0.000342121	-0.000621804	-0.000273778	0.000415142	-0.000569477	-0.000277127
1741.06	0.000350252	-0.000799296	-0.000776364	-0.00104538	-0.000609659			1741.06	0.000350252	-0.000609659	-0.000791515	-0.00109466	-0.00113312	-0.00136493		1741.06	0.000350252	-0.000609659	-0.000264545	0.000419618	-0.000559182	-0.000267017
1740.74	0.000357224	-0.000785543	-0.00076308	-0.00102977	-0.000597647			1740.74	0.000357224	-0.000597647	-0.000779114	-0.00107994	-0.00111962	-0.0013486		1740.74	0.000357224	-0.000597647	-0.000255406	0.0004233	-0.000548785	-0.000257204
1740.41	0.000363092	-0.000771649	-0.000749671	-0.00101379	-0.000585626			1740.41	0.000363092	-0.000585626	-0.000766717	-0.0010652	-0.00110572	-0.00133209		1740.41	0.000363092	-0.000585626	-0.000246122	0.000426839	-0.000538242	-0.000247572
1740.09	0.000368028	-0.000757517	-0.000736001	-0.000997389	-0.000573413			1740.09	0.000368028	-0.000573413	-0.000754084	-0.00104995	-0.00109131	-0.00131516		1740.09	0.000368028	-0.000573413	-0.00023635	0.000430854	-0.000527371	-0.000237689
1739.77	0.000372178	-0.000743082	-0.000722003	-0.000980452	-0.000560785			1739.77	0.000372178	-0.000560785	-0.000741038	-0.00103394	-0.00107635	-0.00129765		1739.77	0.000372178	-0.000560785	-0.000225865	0.000435771	-0.000516105	-0.00022729
1739.45	0.000375653	-0.000728295	-0.000707581	-0.000962923	-0.000547564			1739.45	0.000375653	-0.000547564	-0.000727474	-0.00101693	-0.00106081	-0.00127947		1739.45	0.000375653	-0.000547564	-0.000214396	0.000441675	-0.00050434	-0.000216184
1739.13	0.000378383	-0.000713136	-0.000692669	-0.000944772	-0.000533649			1739.13	0.000378383	-0.000533649	-0.000713355	-0.000998931	-0.00104473	-0.00126059		1739.13	0.000378383	-0.000533649	-0.00020204	0.000448303	-0.000492066	-0.000204352
1738.81	0.000380407	-0.000697607	-0.000677312	-0.00092597	-0.000519049			1738.81	0.000380407	-0.000519049	-0.000698776	-0.000980019	-0.00102816	-0.00124106		1738.81	0.000380407	-0.000519049	-0.000188777	0.000455054	-0.0004793	-0.0001919
1738.49	0.00038165	-0.000681691	-0.000661484	-0.000906525	-0.000503898			1738.49	0.00038165	-0.000503898	-0.000683787	-0.000960524	-0.00101112	-0.00122099		1738.49	0.00038165	-0.000503898	-0.000174843	0.0004615	-0.00046608	-0.000179013
1738.16	0.000382151	-0.000665393	-0.000645207	-0.00088646	-0.000488308			1738.16	0.000382151	-0.000488308	-0.000668464	-0.000940547	-0.000993596	-0.00120041		1738.16	0.000382151	-0.000488308	-0.000160435	0.000466946	-0.000452416	-0.000165899
1737.84	0.000381952	-0.000648677	-0.000628537	-0.000865795	-0.00047243			1737.84	0.000381952	-0.00047243	-0.00065285	-0.000920461	-0.000975565	-0.00117939		1737.84	0.000381952	-0.00047243	-0.000145703	0.000471414	-0.0004383	-0.000152696
1737.52	0.000381245	-0.000631486	-0.000611328	-0.000844496	-0.000456283			1737.52	0.000381245	-0.000456283	-0.000636855	-0.00090014	-0.000956913	-0.00115776		1737.52	0.000381245	-0.000456283	-0.000130565	0.000474984	-0.000423643	-0.000139348
1737.2	0.000380135	-0.000613786	-0.0005936	-0.000822539	-0.000439933			1737.2	0.000380135	-0.000439933	-0.000620444	-0.000879791	-0.000937576	-0.0011355		1737.2	0.000380135	-0.000439933	-0.000115183	0.000477959	-0.000408425	-0.000125949
1736.88	0.000378782	-0.000595473	-0.000575186	-0.000799836	-0.000423289			1736.88	0.000378782	-0.000423289	-0.000603503	-0.000859306	-0.000917425	-0.00111241		1736.88	0.000378782	-0.000423289	-9.94921e-05	0.000480905	-0.000392581	-0.000112362
1736.56	0.000377462	-0.000576413	-0.000555977	-0.000776251	-0.000406226			1736.56	0.000377462	-0.000406226	-0.000585841	-0.000838599	-0.000896375	-0.00108841		1736.56	0.000377462	-0.000406226	-8.3439e-05	0.000484025	-0.000376034	-9.85305e-05
1736.24	0.000376383	-0.000556436	-0.000535742	-0.000751541	-0.000388457			1736.24	0.000376383	-0.000388457	-0.000567308	-0.000817493	-0.00087428	-0.00106333		1736.24	0.000376383	-0.000388457	-6.69549e-05	0.000487936	-0.000358635	-8.42927e-05
1735.92	0.000375918	-0.000535291	-0.000514313	-0.000725483	-0.000369704			1735.92	0.000375918	-0.000369704	-0.00054771	-0.000795663	-0.000850977	-0.0010371		1735.92	0.000375918	-0.000369704	-4.99388e-05	0.00049282	-0.000340254	-6.94385e-05
1735.59	0.000376393	-0.000512722	-0.00049147	-0.000697767	-0.000349649			1735.59	0.000376393	-0.000349649	-0.000526858	-0.000772768	-0.00082625	-0.00100947		1735.59	0.000376393	-0.000349649	-3.20484e-05	0.000499178	-0.000320641	-5.37125e-05
1735.27	0.00037812	-0.000488489	-0.000467027	-0.000668112	-0.000327974			1735.27	0.00037812	-0.000327974	-0.000504478	-0.000748288	-0.000799922	-0.000980276		1735.27	0.00037812	-0.000327974	-1.30407e-05	0.000507205	-0.000299515	-3.677e-05
1734.95	0.000381346	-0.000462325	-0.000440734	-0.000636272	-0.000304333			1734.95	0.000381346	-0.000304333	-0.000480305	-0.000721757	-0.000771737	-0.000949223		1734.95	0.000381346	-0.000304333	7.49255e-06	0.000517269	-0.000276588	-1.81574e-05
1734.63	0.000386412	-0.00043402	-0.000412413	-0.000601996	-0.00027852			1734.63	0.000386412	-0.00027852	-0.000454111	-0.000692671	-0.000741436	-0.000916013		1734.63	0.000386412	-0.00027852	2.99812e-05	0.000529748	-0.0002516	2.56361e-06
1734.31	0.000393562	-0.000403394	-0.00038188	-0.000565143	-0.000250306			1734.31	0.000393562	-0.000250306	-0.000425582	-0.000660594	-0.000708854	-0.000880336		1734.31	0.000393562	-0.000250306	5.48316e-05	0.000545259	-0.000224325	2.5853e-05
1733.99	0.000402998	-0.000370322	-0.000349009	-0.00052561	-0.000219621			1733.99	0.000402998	-0.000219621	-0.000394584	-0.000625413	-0.000673838	-0.000842058		1733.99	0.000402998	-0.000219621	8.22514e-05	0.000563886	-0.00019463	5.19366e-05
1733.67	0.000414876	-0.000334768	-0.000313668	-0.000483368	-0.000186381			1733.67	0.000414876	-0.000186381	-0.000360989	-0.00058694	-0.000636313	-0.000801026		1733.67	0.000414876	-0.000186381	0.000112434	0.000585839	-0.000162452	8.09111e-05
1733.34	0.000429154	-0.000296725	-0.000275961	-0.000438504	-0.000150729			1733.34	0.000429154	-0.000150729	-0.000324875	-0.000545507	-0.000596347	-0.000757532		1733.34	0.000429154	-0.000150729	0.000145098	0.000610782	-0.000127962	0.000112637
1733.02	0.000445867	-0.00025631	-0.000235966	-0.000391132	-0.000112761			1733.02	0.000445867	-0.000112761	-0.000286411	-0.000501338	-0.000554079	-0.000711724		1733.02	0.000445867	-0.000112761	0.000180052	0.000638234	-9.12553e-05	0.000146858
1732.7	0.000464797	-0.000213729	-0.000193928	-0.000341485	-7.27899e-05			1732.7	0.000464797	-7.27899e-05	-0.000245937	-0.000454986	-0.000509784	-0.0006641		1732.7	0.000464797	-7.27899e-05	0.000216796	0.000667425	-5.26135e-05	0.000183021
1732.38	0.000485581	-0.000169331	-0.000150284	-0.000289892	-3.12206e-05			1732.38	0.000485581	-3.12206e-05	-0.000203984	-0.00040709	-0.000463882	-0.000615163		1732.38	0.000485581	-3.12206e-05	0.000254653	0.000697244	-1.24485e-05	0.000220544
1732.06	0.000507743	-0.000123579	-0.000105421	-0.000236762	1.14336e-05			1732.06	0.000507743	1.14336e-05	-0.000161121	-0.000358361	-0.000416839	-0.000565406		1732.06	0.000507743	1.14336e-05	0.000292988	0.000727094	2.8752e-05	0.00025877
1731.74	0.00053057	-7.70904e-05	-5.99674e-05	-0.000182651	5.45177e-05			1731.74	0.00053057	5.45177e-05	-0.000118075	-0.000309599	-0.000369341	-0.000515438		1731.74	0.00053057	5.45177e-05	0.000331016	0.000756011	7.03309e-05	0.00029697
1731.42	0.000553395	-3.06134e-05	-1.4619e-05	-0.000128223	9.73237e-05			1731.42	0.000553395	9.73237e-05	-7.55929e-05	-0.000261509	-0.000322046	-0.000465764		1731.42	0.000553395	9.73237e-05	0.000367954	0.000783659	0.000111646	0.000334401
1731.09	0.000575202	1.49766e-05	2.97841e-05	-7.42812e-05	0.000139013			1731.09	0.000575202	0.000139013	-3.4438e-05	-0.000214836	-0.000275791	-0.000416968		1731.09	0.000575202	0.000139013	0.000403035	0.000809487	0.000151837	0.000370319
1730.77	0.000595254	5.87541e-05	7.23551e-05	-2.17072e-05	0.000178827			1730.77	0.000595254	0.000178827	4.6076e-06	-0.000170203	-0.000231371	-0.00036958		1730.77	0.000595254	0.000178827	0.00043559	0.000833445	0.000190202	0.000404059
1730.45	0.000612473	9.96186e-05	0.000112047	2.84024e-05	0.000215792			1730.45	0.000612473	0.000215792	4.06421e-05	-0.000128406	-0.000189776	-0.000324332		1730.45	0.000612473	0.000215792	0.000464805	0.000854792	0.000225786	0.000434778
1730.13	0.000625944	0.000136533	0.000147799	7.49737e-05	0.000249128			1730.13	0.000625944	0.000249128	7.28512e-05	-9.00663e-05	-0.000151888	-0.000281979		1730.13	0.000625944	0.000249128	0.000489898	0.00087289	0.000257779	0.000461781
1729.81	0.0006347	0.00016847	0.000178566	0.000116862	0.00027793			1729.81	0.0006347	0.00027793	0.000100298	-5.61159e-05	-0.000118675	-0.000243341		1729.81	0.0006347	0.00027793	0.000510009	0.000886928	0.000285224	0.000484279
1729.49	0.000637956	0.000194467	0.000203484	0.000153053	0.000301529			1729.49	0.000637956	0.000301529	0.000122135	-2.73212e-05	-9.09262e-05	-0.000209274		1729.49	0.000637956	0.000301529	0.000524347	0.000895634	0.000307381	0.000501586
1729.17	0.000635062	0.000213838	0.000221951	0.000182636	0.000319308			1729.17	0.000635062	0.000319308	0.000137683	-4.41592e-06	-6.93053e-05	-0.000180509		1729.17	0.000635062	0.000319308	0.000532261	0.000898047	0.000323527	0.000513135
1728.84	0.00062576	0.000226165	0.000233582	0.000205027	0.000330931			1728.84	0.00062576	0.000330931	0.000146504	1.20756e-05	-5.41726e-05	-0.00015764		1728.84	0.00062576	0.000330931	0.000533282	0.000893453	0.000333237	0.0005185
1728.52	0.000610091	0.000231314	0.000238492	0.000219933	0.000336284			1728.52	0.000610091	0.000336284	0.000148547	2.19772e-05	-4.55662e-05	-0.000140914		1728.52	0.000610091	0.000336284	0.000527401	0.000881713	0.00033635	0.000517624
1728.2	0.000588544	0.000229567	0.000236994	0.000227417	0.000335544			1728.2	0.000588544	0.000335544	0.000144181	2.54666e-05	-4.31793e-05	-0.000130285		1728.2	0.000588544	0.000335544	0.000515027	0.000862914	0.000333066	0.000510639
1727.88	0.000561856	0.000221449	0.000229613	0.000227822	0.000329062			1727.88	0.000561856	0.000329062	0.000133995	2.30871e-05	-4.64983e-05	-0.000125416		1727.88	0.000561856	0.000329062	0.000496764	0.000837883	0.000323813	0.000497896
1727.56	0.000531072	0.000207756	0.000217117	0.000221824	0.000317455			1727.56	0.000531072	0.000317455	0.00011893	1.56383e-05	-5.472e-05	-0.000125636		1727.56	0.000531072	0.000317455	0.000473614	0.000807674	0.000309348	0.000480048
1727.24	0.000497341	0.000189509	0.000200328	0.000210217	0.000301462			1727.24	0.000497341	0.000301462	0.000100163	4.04273e-06	-6.69141e-05	-0.000130081		1727.24	0.000497341	0.000301462	0.000446879	0.000773646	0.000290507	0.000457911
1726.92	0.000461895	0.000167705	0.000180188	0.000194012	0.000281925			1726.92	0.000461895	0.000281925	7.87869e-05	-1.04396e-05	-8.20853e-05	-0.000137795		1726.92	0.000461895	0.000281925	0.000417666	0.000737195	0.00026832	0.000432395
1726.59	0.000425492	0.000143367	0.000157395	0.000174118	0.000259569			1726.59	0.000425492	0.000259569	5.56806e-05	-2.71211e-05	-9.93847e-05	-0.000147914		1726.59	0.000425492	0.000259569	0.000386938	0.000699108	0.000243609	0.000404389
1726.27	0.000388993	0.000117475	0.000132893	0.000151525	0.000235205			1726.27	0.000388993	0.000235205	3.18282e-05	-4.50092e-05	-0.00011789	-0.000159506		1726.27	0.000388993	0.000235205	0.000355654	0.000660545	0.000217276	0.000374791
1725.95	0.000353148	9.09125e-05	0.000107519	0.000127153	0.000209604			1725.95	0.000353148	0.000209604	7.94772e-06	-6.32938e-05	-0.000136809	-0.000171806		1725.95	0.000353148	0.000209604	0.000324469	0.0006221	0.000190197	0.000344431
1725.63	0.00031826	6.44295e-05	8.19272e-05	0.000101818	0.000183436			1725.63	0.00031826	0.000183436	-1.54564e-05	-8.12926e-05	-0.000155467	-0.000184173		1725.63	0.00031826	0.000183436	0.000293917	0.000584367	0.000163013	0.000314014
1725.31	0.000284689	3.86181e-05	5.68207e-05	7.62703e-05	0.000157226			1725.31	0.000284689	0.000157226	-3.78984e-05	-9.8388e-05	-0.000173312	-0.000196048		1725.31	0.000284689	0.000157226	0.000264235	0.00054763	0.000136292	0.000284088
1724.99	0.000252678	1.39799e-05	3.27126e-05	5.11448e-05	0.000131535			1724.99	0.000252678	0.000131535	-5.90797e-05	-0.000114138	-0.000189844	-0.000207012		1724.99	0.000252678	0.000131535	0.000235664	0.000512122	0.000110485	0.000255052
1724.67	0.000222452	-9.13389e-06	9.98922e-06	2.70253e-05	0.0001068			1724.67	0.000222452	0.0001068	-7.86685e-05	-0.000128118	-0.000204716	-0.000216669		1724.67	0.000222452	0.0001068	0.000208423	0.000478206	8.59495e-05	0.00022727
1724.34	0.000194205	-3.04416e-05	-1.1009e-05	4.36694e-06	8.34655e-05			1724.34	0.000194205	8.34655e-05	-9.63698e-05	-0.000139949	-0.000217663	-0.00022476		1724.34	0.000194205	8.34655e-05	0.000182724	0.000446079	6.29403e-05	0.000201087
1724.02	0.000168068	-4.97994e-05	-3.01614e-05	-1.6496e-05	6.18369e-05			1724.02	0.000168068	6.18369e-05	-0.000112082	-0.000149597	-0.000228554	-0.000231093		1724.02	0.000168068	6.18369e-05	0.000158742	0.000416117	4.16067e-05	0.000176654
1723.7	0.000144211	-6.7118e-05	-4.73537e-05	-3.53505e-05	4.20853e-05			1723.7	0.000144211	4.20853e-05	-0.000125616	-0.000156945	-0.000237338	-0.000235524		1723.7	0.000144211	4.20853e-05	0.000136645	0.000388396	2.20677e-05	0.000154271
1723.38	0.000122557	-8.23858e-05	-6.25452e-05	-5.20838e-05	2.43577e-05			1723.38	0.000122557	2.43577e-05	-0.000136986	-0.000162063	-0.000244056	-0.000238013		1723.38	0.000122557	2.43577e-05	0.000116582	0.000362968	4.38769e-06	0.000134021
1723.06	0.000103224	-9.56551e-05	-7.57799e-05	-6.67059e-05	8.64234e-06			1723.06	0.000103224	8.64234e-06	-0.000146256	-0.000165029	-0.000248802	-0.000238578		1723.06	0.000103224	8.64234e-06	9.85784e-05	0.000339858	-1.14192e-05	0.000116058
1722.74	8.58653e-05	-0.000107082	-8.72015e-05	-7.93523e-05	-5.14527e-06			1722.74	8.58653e-05	-5.14527e-06	-0.000153594	-0.000166158	-0.000251743	-0.000237349		1722.74	8.58653e-05	-5.14527e-06	8.24388e-05	0.000318572	-2.5401e-05	0.000100329
1722.42	7.03742e-05	-0.000116784	-9.69517e-05	-9.01569e-05	-1.72292e-05			1722.42	7.03742e-05	-1.72292e-05	-0.000159225	-0.00016556	-0.000253094	-0.000234477		1722.42	7.03742e-05	-1.72292e-05	6.79481e-05	0.000298939	-3.76512e-05	8.65737e-05
1722.09	5.64189e-05	-0.000124937	-0.000105193	-9.92904e-05	-2.77754e-05			1722.09	5.64189e-05	-2.77754e-05	-0.000163419	-0.000163422	-0.000253003	-0.000230141		1722.09	5.64189e-05	-2.77754e-05	5.48983e-05	0.000280599	-4.82661e-05	7.4604e-05
1721.77	4.37121e-05	-0.000131719	-0.000112214	-0.000106954	-3.70792e-05			1721.77	4.37121e-05	-3.70792e-05	-0.000166377	-0.000160058	-0.000251673	-0.000224566		1721.77	4.37121e-05	-3.70792e-05	4.29295e-05	0.000263022	-5.74903e-05	6.39249e-05
1721.45	3.20784e-05	-0.00013726	-0.000118123	-0.000113286	-4.53411e-05			1721.45	3.20784e-05	-4.53411e-05	-0.000168259	-0.00015561	-0.000249309	-0.000217955		1721.45	3.20784e-05	-4.53411e-05	3.1811e-05	0.000246238	-6.54877e-05	5.42509e-05
1721.13	2.13696e-05	-0.000141667	-0.000123083	-0.000118415	-5.27212e-05			1721.13	2.13696e-05	-5.27212e-05	-0.0001693	-0.000150333	-0.000246025	-0.000210563		1721.13	2.13696e-05	-5.27212e-05	2.1491e-05	0.000230121	-7.25013e-05	4.52453e-05
1720.81	1.14923e-05	-0.000145047	-0.000127216	-0.000122497	-5.94114e-05			1720.81	1.14923e-05	-5.94114e-05	-0.000169597	-0.000144628	-0.000242046	-0.000202546		1720.81	1.14923e-05	-5.94114e-05	1.17628e-05	0.000214492	-7.87846e-05	3.66023e-05
1720.49	2.50053e-06	-0.000147449	-0.000130534	-0.000125614	-6.54606e-05			1720.49	2.50053e-06	-6.54606e-05	-0.000169279	-0.000138495	-0.000237491	-0.000194067		1720.49	2.50053e-06	-6.54606e-05	2.55968e-06	0.000199379	-8.44945e-05	2.83767e-05
1720.17	-5.74505e-06	-0.000149025	-0.000133176	-0.000127908	-7.10135e-05			1720.17	-5.74505e-06	-7.10135e-05	-0.000168494	-0.000132209	-0.000232508	-0.00018535		1720.17	-5.74505e-06	-7.10135e-05	-6.27208e-06	0.000184479	-8.9854e-05	2.04074e-05
1719.84	-1.31006e-05	-0.000149836	-0.000135125	-0.000129421	-7.60059e-05			1719.84	-1.31006e-05	-7.60059e-05	-0.00016728	-0.000125746	-0.000227158	-0.000176387		1719.84	-1.31006e-05	-7.60059e-05	-1.48152e-05	0.000170072	-9.48939e-05	1.29114e-05
1719.52	-1.96158e-05	-0.000150026	-0.000136494	-0.000130259	-8.04393e-05			1719.52	-1.96158e-05	-8.04393e-05	-0.000165686	-0.000119102	-0.000221521	-0.000167253		1719.52	-1.96158e-05	-8.04393e-05	-2.30969e-05	0.00015593	-9.96332e-05	5.98448e-06
1719.2	-2.53206e-05	-0.000149713	-0.000137258	-0.000130447	-8.42948e-05			1719.2	-2.53206e-05	-8.42948e-05	-0.000163734	-0.000112129	-0.000215564	-0.000157863		1719.2	-2.53206e-05	-8.42948e-05	-3.11638e-05	0.000142489	-0.000103993	-2.48314e-07
1718.88	-3.00558e-05	-0.000148903	-0.000137453	-0.000130023	-8.75085e-05			1718.88	-3.00558e-05	-8.75085e-05	-0.000161336	-0.000104558	-0.000209228	-0.000148137		1718.88	-3.00558e-05	-8.75085e-05	-3.87071e-05	0.000130295	-0.000107823	-5.62039e-06
1718.56	-3.38872e-05	-0.000147706	-0.000137104	-0.000129042	-9.00735e-05			1718.56	-3.38872e-05	-9.00735e-05	-0.000158386	-9.63977e-05	-0.000202497	-0.000138021		1718.56	-3.38872e-05	-9.00735e-05	-4.56893e-05	0.000119532	-0.000111019	-1.01154e-05
1718.24	-3.66185e-05	-0.000146106	-0.000136192	-0.000127509	-9.19284e-05			1718.24	-3.66185e-05	-9.19284e-05	-0.000154841	-8.7439e-05	-0.000195315	-0.000127421		1718.24	-3.66185e-05	-9.19284e-05	-5.15864e-05	0.000110703	-0.000113399	-1.3636e-05
1717.92	-3.83807e-05	-0.00014412	-0.000134833	-0.000125525	-9.32368e-05			1717.92	-3.83807e-05	-9.32368e-05	-0.000150744	-7.79326e-05	-0.000187774	-0.000116446		1717.92	-3.83807e-05	-9.32368e-05	-5.64056e-05	0.000103739	-0.000115006	-1.63217e-05
1717.59	-3.91825e-05	-0.000141761	-0.00013314	-0.000123147	-9.41094e-05			1717.59	-3.91825e-05	-9.41094e-05	-0.000146141	-6.81174e-05	-0.000179964	-0.000105213		1717.59	-3.91825e-05	-9.41094e-05	-6.0134e-05	9.82523e-05	-0.000115961	-1.83381e-05
1717.27	-3.92199e-05	-0.000139131	-0.000131303	-0.000120542	-9.47815e-05			1717.27	-3.92199e-05	-9.47815e-05	-0.000141331	-5.84676e-05	-0.000172088	-9.40259e-05		1717.27	-3.92199e-05	-9.47815e-05	-6.30838e-05	9.34902e-05	-0.000116435	-1.99879e-05
1716.95	-3.85773e-05	-0.000136244	-0.000129449	-0.000117785	-9.5374e-05			1716.95	-3.85773e-05	-9.5374e-05	-0.000136474	-4.92885e-05	-0.000164308	-8.30524e-05		1716.95	-3.85773e-05	-9.5374e-05	-6.55644e-05	8.88683e-05	-0.000116641	-2.1556e-05
1716.63	-3.75026e-05	-0.000133329	-0.000127729	-0.000115017	-9.61019e-05			1716.63	-3.75026e-05	-9.61019e-05	-0.000131894	-4.08949e-05	-0.000156788	-7.25861e-05		1716.63	-3.75026e-05	-9.61019e-05	-6.80345e-05	8.34999e-05	-0.000116836	-2.33824e-05
1716.31	-3.60694e-05	-0.000130433	-0.000126182	-0.000112332	-9.69666e-05			1716.31	-3.60694e-05	-9.69666e-05	-0.000127701	-3.34456e-05	-0.000149613	-6.27271e-05		1716.31	-3.60694e-05	-9.69666e-05	-7.09062e-05	7.71845e-05	-0.000117187	-2.56732e-05
1715.99	-3.43824e-05	-0.000127694	-0.000124824	-0.000109788	-9.80212e-05			1715.99	-3.43824e-05	-9.80212e-05	-0.000124026	-2.69312e-05	-0.000142812	-5.35451e-05		1715.99	-3.43824e-05	-9.80212e-05	-7.42772e-05	6.97635e-05	-0.000117765	-2.85121e-05
1715.67	-3.24645e-05	-0.000125167	-0.000123501	-0.000107402	-9.91568e-05			1715.67	-3.24645e-05	-9.91568e-05	-0.000120698	-2.11835e-05	-0.000136321	-4.49489e-05		1715.67	-3.24645e-05	-9.91568e-05	-7.81162e-05	6.15148e-05	-0.000118543	-3.18145e-05
1715.35	-3.02838e-05	-0.000122867	-0.000122144	-0.00010516	-0.000100307			1715.35	-3.02838e-05	-0.000100307	-0.00011766	-1.59604e-05	-0.000130104	-3.68676e-05		1715.35	-3.02838e-05	-0.000100307	-8.22019e-05	5.30841e-05	-0.000119443	-3.53736e-05
1715.02	-2.76801e-05	-0.000120719	-0.000120655	-0.000103002	-0.000101328			1715.02	-2.76801e-05	-0.000101328	-0.000114632	-1.09836e-05	-0.000124021	-2.91088e-05		1715.02	-2.76801e-05	-0.000101328	-8.61483e-05	4.48667e-05	-0.000120321	-3.89368e-05
1714.7	-2.46294e-05	-0.000118619	-0.000118987	-0.000100864	-0.000102084			1714.7	-2.46294e-05	-0.000102084	-0.000111453	-6.02112e-06	-0.000118013	-2.16124e-05		1714.7	-2.46294e-05	-0.000102084	-8.95814e-05	3.75047e-05	-0.00012099	-4.23004e-05
1714.38	-2.09678e-05	-0.000116466	-0.000117147	-9.87174e-05	-0.000102594			1714.38	-2.09678e-05	-0.000102594	-0.00010802	-9.09698e-07	-0.000112073	-1.43543e-05		1714.38	-2.09678e-05	-0.000102594	-9.22643e-05	3.13038e-05	-0.000121392	-4.52633e-05
1714.06	-1.66336e-05	-0.00011412	-0.000115177	-9.65018e-05	-0.000102837			1714.06	-1.66336e-05	-0.000102837	-0.00010432	4.3599e-06	-0.000106186	-7.33149e-06		1714.06	-1.66336e-05	-0.000102837	-9.41144e-05	2.63976e-05	-0.00012144	-4.78172e-05
1713.74	-1.15896e-05	-0.000111553	-0.000113169	-9.42282e-05	-0.000102863			1713.74	-1.15896e-05	-0.000102863	-0.000100392	9.68631e-06	-0.00010048	-6.84624e-07		1713.74	-1.15896e-05	-0.000102863	-9.5211e-05	2.27338e-05	-0.000121158	-4.99511e-05
1713.42	-5.90386e-06	-0.000108784	-0.000111154	-9.19449e-05	-0.000102766			1713.42	-5.90386e-06	-0.000102766	-9.64655e-05	1.49327e-05	-9.50044e-05	5.50985e-06		1713.42	-5.90386e-06	-0.000102766	-9.58686e-05	2.008e-05	-0.000120606	-5.17605e-05
1713.1	2.03101e-07	-0.0001059	-0.000109278	-8.97163e-05	-0.000102631			1713.1	2.03101e-07	-0.000102631	-9.26384e-05	1.9783e-05	-8.98544e-05	1.11343e-05		1713.1	2.03101e-07	-0.000102631	-9.64265e-05	1.80074e-05	-0.000119885	-5.33758e-05
1712.77	6.50472e-06	-0.000103028	-0.000107501	-8.75913e-05	-0.000102571			1712.77	6.50472e-06	-0.000102571	-8.91187e-05	2.40679e-05	-8.50824e-05	1.61058e-05		1712.77	6.50472e-06	-0.000102571	-9.70703e-05	1.60392e-05	-0.000119169	-5.48352e-05
1712.45	1.28028e-05	-0.000100325	-0.000105869	-8.56363e-05	-0.00010261			1712.45	1.28028e-05	-0.00010261	-8.59668e-05	2.77193e-05	-8.06984e-05	2.04563e-05		1712.45	1.28028e-05	-0.00010261	-9.80038e-05	1.3733e-05	-0.000118492	-5.61892e-05
1712.13	1.88173e-05	-9.78871e-05	-0.000104459	-8.38917e-05	-0.000102732			1712.13	1.88173e-05	-0.000102732	-8.32857e-05	3.05609e-05	-7.67451e-05	2.4161e-05		1712.13	1.88173e-05	-0.000102732	-9.92577e-05	1.04042e-05	-0.000117969	-5.75508e-05
1711.81	2.45086e-05	-9.57436e-05	-0.000103225	-8.23733e-05	-0.000102917			1711.81	2.45086e-05	-0.000102917	-8.10227e-05	3.27308e-05	-7.31731e-05	2.7301e-05		1711.81	2.45086e-05	-0.000102917	-0.000100723	6.13363e-06	-0.000117623	-5.88506e-05
1711.49	2.98773e-05	-9.38393e-05	-0.000102139	-8.10295e-05	-0.000103028			1711.49	2.98773e-05	-0.000103028	-7.90458e-05	3.43607e-05	-6.99527e-05	3.00016e-05		1711.49	2.98773e-05	-0.000103028	-0.000102071	8.00064e-07	-0.000117398	-6.0069e-05
1711.17	3.49199e-05	-9.21083e-05	-0.000101201	-7.98525e-05	-0.00010298			1711.17	3.49199e-05	-0.00010298	-7.73741e-05	3.54875e-05	-6.70187e-05	3.23248e-05		1711.17	3.49199e-05	-0.00010298	-0.000103228	-5.28008e-06	-0.000117261	-6.12255e-05
1710.85	3.98303e-05	-9.0389e-05	-0.000100342	-7.87856e-05	-0.000102662			1710.85	3.98303e-05	-0.000102662	-7.5801e-05	3.63484e-05	-6.43313e-05	3.4346e-05		1710.85	3.98303e-05	-0.000102662	-0.000104028	-1.15203e-05	-0.000117093	-6.2152e-05
1710.52	4.46615e-05	-8.86067e-05	-9.94612e-05	-7.77462e-05	-0.000102027			1710.52	4.46615e-05	-0.000102027	-7.42583e-05	3.7047e-05	-6.18725e-05	3.61577e-05		1710.52	4.46615e-05	-0.000102027	-0.000104462	-1.74808e-05	-0.000116743	-6.28419e-05
1710.2	4.94603e-05	-8.66473e-05	-9.84631e-05	-7.66563e-05	-0.000101015			1710.2	4.94603e-05	-0.000101015	-7.26744e-05	3.77056e-05	-5.95412e-05	3.77769e-05		1710.2	4.94603e-05	-0.000101015	-0.00010448	-2.24755e-05	-0.000116089	-6.30755e-05
1709.88	5.39314e-05	-8.45725e-05	-9.7294e-05	-7.55304e-05	-9.97555e-05			1709.88	5.39314e-05	-9.97555e-05	-7.10067e-05	3.8277e-05	-5.74012e-05	3.91402e-05		1709.88	5.39314e-05	-9.97555e-05	-0.000104366	-2.64967e-05	-0.000115152	-6.30745e-05
1709.56	5.79543e-05	-8.24227e-05	-9.59393e-05	-7.42881e-05	-9.82808e-05			1709.56	5.79543e-05	-9.82808e-05	-6.93072e-05	3.87508e-05	-5.53565e-05	4.02703e-05		1709.56	5.79543e-05	-9.82808e-05	-0.000104104	-2.92965e-05	-0.000113878	-6.2824e-05
1709.24	6.12129e-05	-8.02869e-05	-9.43901e-05	-7.29536e-05	-9.67262e-05			1709.24	6.12129e-05	-9.67262e-05	-6.76582e-05	3.9048e-05	-5.34605e-05	4.1031e-05		1709.24	6.12129e-05	-9.67262e-05	-0.000103839	-3.12321e-05	-0.000112386	-6.25176e-05
1708.92	6.35041e-05	-7.83101e-05	-9.2756e-05	-7.15661e-05	-9.52242e-05			1708.92	6.35041e-05	-9.52242e-05	-6.61531e-05	3.8899e-05	-5.17097e-05	4.13282e-05		1708.92	6.35041e-05	-9.52242e-05	-0.000103693	-3.28332e-05	-0.000110808	-6.25027e-05
1708.6	6.48666e-05	-7.65023e-05	-9.10723e-05	-7.01599e-05	-9.37602e-05			1708.6	6.48666e-05	-9.37602e-05	-6.48162e-05	3.8382e-05	-5.01056e-05	4.11014e-05		1708.6	6.48666e-05	-9.37602e-05	-0.000103498	-3.4326e-05	-0.000109277	-6.28202e-05
1708.27	6.52012e-05	-7.49357e-05	-8.94931e-05	-6.8861e-05	-9.24366e-05			1708.27	6.52012e-05	-9.24366e-05	-6.3724e-05	3.725e-05	-4.8659e-05	4.02772e-05		1708.27	6.52012e-05	-9.24366e-05	-0.000103284	-3.59965e-05	-0.000107906	-6.36662e-05
1707.95	6.48637e-05	-7.35098e-05	-8.79986e-05	-6.76666e-05	-9.118e-05			1707.95	6.48637e-05	-9.118e-05	-6.28032e-05	3.56425e-05	-4.7338e-05	3.88725e-05		1707.95	6.48637e-05	-9.118e-05	-0.000102913	-3.78629e-05	-0.000106707	-6.4872e-05
1707.63	6.41409e-05	-7.21489e-05	-8.65385e-05	-6.66065e-05	-8.99061e-05			1707.63	6.41409e-05	-8.99061e-05	-6.18884e-05	3.36047e-05	-4.61195e-05	3.69962e-05		1707.63	6.41409e-05	-8.99061e-05	-0.000102219	-3.98111e-05	-0.000105612	-6.62045e-05
1707.31	6.3084e-05	-7.07453e-05	-8.51589e-05	-6.56968e-05	-8.85739e-05			1707.31	6.3084e-05	-8.85739e-05	-6.09859e-05	3.13158e-05	-4.50001e-05	3.47168e-05		1707.31	6.3084e-05	-8.85739e-05	-0.000101163	-4.17433e-05	-0.00010457	-6.7545e-05
1706.99	6.17654e-05	-6.92556e-05	-8.3789e-05	-6.49298e-05	-8.72244e-05			1706.99	6.17654e-05	-8.72244e-05	-5.99909e-05	2.88493e-05	-4.39498e-05	3.21667e-05		1706.99	6.17654e-05	-8.72244e-05	-9.99092e-05	-4.34761e-05	-0.000103421	-6.86888e-05
1706.67	6.01101e-05	-6.75858e-05	-8.23682e-05	-6.42476e-05	-8.57622e-05			1706.67	6.01101e-05	-8.57622e-05	-5.88655e-05	2.63763e-05	-4.29707e-05	2.94385e-05		1706.67	6.01101e-05	-8.57622e-05	-9.83829e-05	-4.48375e-05	-0.000102075	-6.94681e-05
1706.35	5.78917e-05	-6.58151e-05	-8.09737e-05	-6.36605e-05	-8.42939e-05			1706.35	5.78917e-05	-8.42939e-05	-5.77822e-05	2.38464e-05	-4.20941e-05	2.65628e-05		1706.35	5.78917e-05	-8.42939e-05	-9.68896e-05	-4.60534e-05	-0.000100513	-7.00081e-05
1706.02	5.49842e-05	-6.39276e-05	-7.95529e-05	-6.31255e-05	-8.28109e-05			1706.02	5.49842e-05	-8.28109e-05	-5.66708e-05	2.13372e-05	-4.12951e-05	2.36157e-05		1706.02	5.49842e-05	-8.28109e-05	-9.53688e-05	-4.69345e-05	-9.87498e-05	-7.02579e-05
1705.7	5.12152e-05	-6.19988e-05	-7.80998e-05	-6.25858e-05	-8.12955e-05			1705.7	5.12152e-05	-8.12955e-05	-5.56177e-05	1.87622e-05	-4.05277e-05	2.06223e-05		1705.7	5.12152e-05	-8.12955e-05	-9.38619e-05	-4.77851e-05	-9.67121e-05	-7.0208e-05
1705.38	4.67496e-05	-6.00543e-05	-7.65307e-05	-6.19635e-05	-7.97277e-05			1705.38	4.67496e-05	-7.97277e-05	-5.45092e-05	1.6208e-05	-3.97771e-05	1.76294e-05		1705.38	4.67496e-05	-7.97277e-05	-9.21831e-05	-4.85437e-05	-9.44368e-05	-6.97905e-05
1705.06	4.17727e-05	-5.80737e-05	-7.46891e-05	-6.11601e-05	-7.79584e-05			1705.06	4.17727e-05	-7.79584e-05	-5.31748e-05	1.37939e-05	-3.89241e-05	1.47395e-05		1705.06	4.17727e-05	-7.79584e-05	-9.01991e-05	-4.92472e-05	-9.1818e-05	-6.88418e-05
1704.74	3.65556e-05	-5.60349e-05	-7.24779e-05	-6.00833e-05	-7.58601e-05			1704.74	3.65556e-05	-7.58601e-05	-5.14198e-05	1.15719e-05	-3.7911e-05	1.2033e-05		1704.74	3.65556e-05	-7.58601e-05	-8.76099e-05	-4.97493e-05	-8.87944e-05	-6.71889e-05
1704.42	3.1349e-05	-5.39151e-05	-6.98168e-05	-5.8665e-05	-7.33262e-05			1704.42	3.1349e-05	-7.33262e-05	-4.91328e-05	9.71078e-06	-3.66579e-05	9.55541e-06		1704.42	3.1349e-05	-7.33262e-05	-8.43673e-05	-5.0059e-05	-8.52722e-05	-6.47938e-05
1704.1	2.63839e-05	-5.16454e-05	-6.66401e-05	-5.68215e-05	-7.02799e-05			1704.1	2.63839e-05	-7.02799e-05	-4.62128e-05	8.29311e-06	-3.5156e-05	7.39376e-06		1704.1	2.63839e-05	-7.02799e-05	-8.03853e-05	-4.99042e-05	-8.12321e-05	-6.15486e-05
1703.77	2.17173e-05	-4.9188e-05	-6.30165e-05	-5.45959e-05	-6.66807e-05			1703.77	2.17173e-05	-6.66807e-05	-4.27069e-05	7.28326e-06	-3.34293e-05	5.54047e-06		1703.77	2.17173e-05	-6.66807e-05	-7.58117e-05	-4.93369e-05	-7.66601e-05	-5.77187e-05
1703.45	1.74108e-05	-4.65164e-05	-5.90346e-05	-5.19915e-05	-6.25965e-05			1703.45	1.74108e-05	-6.25965e-05	-3.89285e-05	6.50718e-06	-3.15567e-05	3.96106e-06		1703.45	1.74108e-05	-6.25965e-05	-7.08516e-05	-4.82335e-05	-7.16417e-05	-5.3572e-05
1703.13	1.32928e-05	-4.35951e-05	-5.48726e-05	-4.9137e-05	-5.82307e-05			1703.13	1.32928e-05	-5.82307e-05	-3.51052e-05	5.65499e-06	-2.96266e-05	2.5006e-06		1703.13	1.32928e-05	-5.82307e-05	-6.57357e-05	-4.68883e-05	-6.63133e-05	-4.94008e-05
1702.81	9.54878e-06	-4.04272e-05	-5.05791e-05	-4.60481e-05	-5.36524e-05			1702.81	9.54878e-06	-5.36524e-05	-3.1517e-05	4.52538e-06	-2.77211e-05	1.1113e-06		1702.81	9.54878e-06	-5.36524e-05	-6.06846e-05	-4.52942e-05	-6.0811e-05	-4.54409e-05
1702.49	6.00531e-06	-3.70485e-05	-4.62714e-05	-4.28237e-05	-4.90654e-05			1702.49	6.00531e-06	-4.90654e-05	-2.84083e-05	2.88343e-06	-2.58732e-05	-3.7103e-07		1702.49	6.00531e-06	-4.90654e-05	-5.58208e-05	-4.38055e-05	-5.53143e-05	-4.1888e-05
1702.17	2.773e-06	-3.34599e-05	-4.19645e-05	-3.9439e-05	-4.45726e-05			1702.17	2.773e-06	-4.45726e-05	-2.58192e-05	5.57717e-07	-2.40936e-05	-1.9538e-06		1702.17	2.773e-06	-4.45726e-05	-5.11763e-05	-4.2352e-05	-4.98885e-05	-3.87507e-05
1701.85	-5.15865e-08	-2.96539e-05	-3.75301e-05	-3.58341e-05	-4.01202e-05			1701.85	-5.15865e-08	-4.01202e-05	-2.35676e-05	-2.12801e-06	-2.22492e-05	-3.59921e-06		1701.85	-5.15865e-08	-4.01202e-05	-4.65025e-05	-4.07749e-05	-4.44788e-05	-3.57603e-05
1701.52	-2.3441e-06	-2.56069e-05	-3.28703e-05	-3.18287e-05	-3.55126e-05			1701.52	-2.3441e-06	-3.55126e-05	-2.13692e-05	-4.86302e-06	-2.01716e-05	-5.09529e-06		1701.52	-2.3441e-06	-3.55126e-05	-4.15078e-05	-3.86447e-05	-3.8872e-05	-3.26143e-05
1701.2	-3.95412e-06	-2.12814e-05	-2.77906e-05	-2.72774e-05	-3.04895e-05			1701.2	-3.95412e-06	-3.04895e-05	-1.88561e-05	-7.00692e-06	-1.76311e-05	-6.16042e-06		1701.2	-3.95412e-06	-3.04895e-05	-3.57785e-05	-3.52347e-05	-3.28784e-05	-2.88064e-05
1700.88	-4.73902e-06	-1.66313e-05	-2.21498e-05	-2.19614e-05	-2.47328e-05			1700.88	-4.73902e-06	-2.47328e-05	-1.56537e-05	-8.04107e-06	-1.44773e-05	-6.47748e-06		1700.88	-4.73902e-06	-2.47328e-05	-2.90612e-05	-3.00481e-05	-2.61979e-05	-2.39937e-05
1700.56	-4.44826e-06	-1.15596e-05	-1.56602e-05	-1.56925e-05	-1.78475e-05			1700.56	-4.44826e-06	-1.78475e-05	-1.14565e-05	-7.29255e-06	-1.05004e-05	-5.66211e-06		1700.56	-4.44826e-06	-1.78475e-05	-2.08169e-05	-2.24272e-05	-1.85621e-05	-1.7659e-05
1700.24	-2.92859e-06	-6.04564e-06	-8.3035e-06	-8.39039e-06	-9.64057e-06			1700.24	-2.92859e-06	-9.64057e-06	-6.23452e-06	-4.6319e-06	-5.65813e-06	-3.52549e-06		1700.24	-2.92859e-06	-9.64057e-06	-1.11496e-05	-1.23419e-05	-9.85184e-06	-9.67822e-06
1699.92	0	0	0	0	0			1699.92	0	0	0	0	0	0		1699.92	0	0	0	0	0	0
1699.6	4.24481e-06	6.52244e-06	9.16922e-06	9.36529e-06	1.08914e-05			1699.6	4.24481e-06	1.08914e-05	6.91057e-06	6.18913e-06	6.31645e-06	4.75784e-06		1699.6	4.24481e-06	1.08914e-05	1.21644e-05	1.36141e-05	1.07496e-05	1.105e-05
1699.27	9.68503e-06	1.35117e-05	1.91161e-05	1.95818e-05	2.28549e-05			1699.27	9.68503e-06	2.28549e-05	1.4262e-05	1.34369e-05	1.31731e-05	1.05123e-05		1699.27	9.68503e-06	2.28549e-05	2.49993e-05	2.7621e-05	2.22181e-05	2.31205e-05
1698.95	1.59634e-05	2.09575e-05	2.96617e-05	3.05198e-05	3.55202e-05			1698.95	1.59634e-05	3.55202e-05	2.17414e-05	2.12014e-05	2.04052e-05	1.69301e-05		1698.95	1.59634e-05	3.55202e-05	3.79596e-05	4.10776e-05	3.41677e-05	3.56615e-05
1698.63	2.26742e-05	2.88038e-05	4.07146e-05	4.20633e-05	4.86111e-05			1698.63	2.26742e-05	4.86111e-05	2.92012e-05	2.89077e-05	2.79538e-05	2.36823e-05		1698.63	2.26742e-05	4.86111e-05	5.07595e-05	5.33758e-05	4.64132e-05	4.82934e-05
1698.31	2.9554e-05	3.7109e-05	5.22059e-05	5.41596e-05	6.1871e-05			1698.31	2.9554e-05	6.1871e-05	3.65451e-05	3.63534e-05	3.58268e-05	3.05647e-05		1698.31	2.9554e-05	6.1871e-05	6.32175e-05	6.40987e-05	5.88542e-05	6.06269e-05
1697.99	3.63941e-05	4.59497e-05	6.42143e-05	6.68553e-05	7.52321e-05			1697.99	3.63941e-05	7.52321e-05	4.39822e-05	4.35697e-05	4.41115e-05	3.75001e-05		1697.99	3.63941e-05	7.52321e-05	7.53171e-05	7.37525e-05	7.15967e-05	7.2648e-05
1697.67	4.32623e-05	5.54108e-05	7.68359e-05	8.02855e-05	8.87918e-05			1697.67	4.32623e-05	8.87918e-05	5.16217e-05	5.07745e-05	5.29731e-05	4.45786e-05		1697.67	4.32623e-05	8.87918e-05	8.72892e-05	8.26456e-05	8.47697e-05	8.44022e-05
1697.35	5.02348e-05	6.56121e-05	9.02517e-05	9.45897e-05	0.000102643			1697.35	5.02348e-05	0.000102643	5.97257e-05	5.83159e-05	6.25447e-05	5.20222e-05		1697.35	5.02348e-05	0.000102643	9.93781e-05	9.18006e-05	9.85975e-05	9.61866e-05
1697.02	5.77733e-05	7.67561e-05	0.000104611	0.000109952	0.000117033			1697.02	5.77733e-05	0.000117033	6.85924e-05	6.66054e-05	7.2997e-05	6.01362e-05		1697.02	5.77733e-05	0.000117033	0.000112065	0.000101853	0.000113357	0.000108381
1696.7	6.62538e-05	8.89427e-05	0.000120051	0.000126546	0.000132171			1696.7	6.62538e-05	0.000132171	7.84485e-05	7.59011e-05	8.44871e-05	6.92849e-05		1696.7	6.62538e-05	0.000132171	0.000125631	0.000113646	0.000129253	0.000121477
1696.38	7.60968e-05	0.000102299	0.000136636	0.000144436	0.000148306			1696.38	7.60968e-05	0.000148306	8.95352e-05	8.65439e-05	9.71117e-05	7.97848e-05		1696.38	7.60968e-05	0.000148306	0.000140424	0.000127871	0.000146477	0.000135929
1696.06	8.76274e-05	0.000116905	0.000154384	0.000163666	0.000165548			1696.06	8.76274e-05	0.000165548	0.000101979	9.86408e-05	0.000110969	9.18879e-05		1696.06	8.76274e-05	0.000165548	0.000156795	0.000144649	0.000165099	0.000152031
1695.74	0.000101132	0.000132847	0.000173349	0.000184215	0.000184021			1695.74	0.000101132	0.000184021	0.000115958	0.000112367	0.000126138	0.00010577		1695.74	0.000101132	0.000184021	0.000174944	0.000164115	0.000185147	0.00017009
1695.42	0.000116621	0.000150005	0.000193433	0.000206024	0.000203708			1695.42	0.000116621	0.000203708	0.000131397	0.000127672	0.000142583	0.000121342		1695.42	0.000116621	0.000203708	0.000194735	0.000185993	0.000206492	0.000190054
1695.1	0.00013398	0.00016839	0.000214631	0.000229008	0.00022457			1695.1	0.00013398	0.00022457	0.00014826	0.000144377	0.000160309	0.000138489		1695.1	0.00013398	0.00022457	0.00021605	0.000209836	0.000229018	0.000211808
1694.78	0.000153173	0.000187962	0.000236967	0.000253128	0.000246623			1694.78	0.000153173	0.000246623	0.000166347	0.000162437	0.000179283	0.000156998		1694.78	0.000153173	0.000246623	0.00023866	0.000235311	0.000252543	0.000235111
1694.45	0.000173682	0.000208637	0.000260408	0.000278335	0.000269777			1694.45	0.000173682	0.000269777	0.000185435	0.000181531	0.000199439	0.000176614		1694.45	0.000173682	0.000269777	0.0002621	0.00026173	0.000276936	0.00025958
1694.13	0.000195213	0.000230389	0.000284966	0.00030461	0.00029399			1694.13	0.000195213	0.00029399	0.000205394	0.000201518	0.000220753	0.000197116		1694.13	0.000195213	0.00029399	0.00028609	0.000288939	0.000302074	0.000284901
1693.81	0.000217439	0.00025322	0.000310608	0.000332007	0.000319302			1693.81	0.000217439	0.000319302	0.000226091	0.000222314	0.000243201	0.000218387		1693.81	0.000217439	0.000319302	0.000310587	0.000316507	0.000327923	0.000310868
1693.49	0.000240081	0.000277114	0.000337294	0.000360532	0.000345737			1693.49	0.000240081	0.000345737	0.000247447	0.000243766	0.000266764	0.000240371		1693.49	0.000240081	0.000345737	0.000335441	0.000344469	0.000354479	0.000337384
1693.17	0.000262923	0.000302022	0.00036488	0.000390184	0.000373165			1693.17	0.000262923	0.000373165	0.00026943	0.000265756	0.000291387	0.000263039		1693.17	0.000262923	0.000373165	0.000360747	0.000372676	0.000381801	0.000364325
1692.85	0.000286036	0.000328006	0.000393277	0.000420988	0.000401585			1692.85	0.000286036	0.000401585	0.000292027	0.000288399	0.000317067	0.000286452		1692.85	0.000286036	0.000401585	0.000386837	0.000401144	0.000409982	0.000391857
1692.53	0.000309704	0.000355035	0.000422505	0.000452983	0.000430985			1692.53	0.000309704	0.000430985	0.000315337	0.000311828	0.00034379	0.000310762		1692.53	0.000309704	0.000430985	0.000413841	0.000430029	0.000439151	0.000420175
1692.2	0.000334194	0.000383147	0.000452546	0.000486195	0.000461254			1692.2	0.000334194	0.000461254	0.000339441	0.000336284	0.000371526	0.000336088		1692.2	0.000334194	0.000461254	0.000441908	0.000459401	0.000469425	0.000449325
1691.88	0.000359914	0.000412358	0.000483461	0.000520688	0.000492405			1691.88	0.000359914	0.000492405	0.00036441	0.000361848	0.0004003	0.000362555		1691.88	0.000359914	0.000492405	0.000471159	0.000489533	0.000500944	0.000479552
1691.56	0.00038709	0.000442697	0.000515397	0.000556474	0.000524422			1691.56	0.00038709	0.000524422	0.000390289	0.000388658	0.000430064	0.000390252		1691.56	0.00038709	0.000524422	0.000501477	0.000520445	0.000533724	0.000510856
1691.24	0.000416022	0.000474213	0.000548572	0.000593694	0.000557442			1691.24	0.000416022	0.000557442	0.000417294	0.000417009	0.000460933	0.00041938		1691.24	0.000416022	0.000557442	0.000532924	0.000552559	0.000567948	0.000543376
1690.92	0.000446651	0.000506937	0.00058315	0.000632359	0.000591574			1690.92	0.000446651	0.000591574	0.000445491	0.000446897	0.000492983	0.000450014		1690.92	0.000446651	0.000591574	0.000565512	0.000586307	0.000603541	0.000577213
1690.6	0.000478928	0.000540894	0.000619331	0.000672541	0.000627007			1690.6	0.000478928	0.000627007	0.000474947	0.000478414	0.000526253	0.000482161		1690.6	0.000478928	0.000627007	0.000599303	0.000621628	0.000640541	0.000612474
1690.28	0.000512931	0.000576119	0.00065719	0.000714281	0.000663879			1690.28	0.000512931	0.000663879	0.000505808	0.000511491	0.000560817	0.000515911		1690.28	0.000512931	0.000663879	0.000634414	0.000658891	0.000678975	0.000649242
1689.95	0.000548469	0.000612675	0.000696737	0.0007576	0.00070227			1689.95	0.000548469	0.00070227	0.000538134	0.000546029	0.000596697	0.00055124		1689.95	0.000548469	0.00070227	0.000671028	0.000698227	0.000718831	0.000687649
1689.63	0.000585641	0.000650618	0.000737997	0.000802529	0.000742363			1689.63	0.000585641	0.000742363	0.000571972	0.00058198	0.000633953	0.00058809		1689.63	0.000585641	0.000742363	0.000709419	0.000739451	0.000760193	0.000727748
1689.31	0.00062434	0.000689977	0.000780811	0.000849081	0.000784058			1689.31	0.00062434	0.000784058	0.000607254	0.000619121	0.000672574	0.000626392		1689.31	0.00062434	0.000784058	0.000749534	0.000782574	0.000803049	0.000769506
1688.99	0.000664616	0.000730858	0.000825206	0.000897244	0.000827417			1688.99	0.000664616	0.000827417	0.00064403	0.000657482	0.000712621	0.000666122		1688.99	0.000664616	0.000827417	0.000791498	0.000827451	0.000847487	0.000812866
1688.67	0.000706616	0.000773324	0.000871144	0.000947101	0.000872466			1688.67	0.000706616	0.000872466	0.000682314	0.000697108	0.000754197	0.000707234		1688.67	0.000706616	0.000872466	0.000835414	0.000874064	0.000893589	0.000857908
1688.35	0.000750295	0.00081745	0.000918628	0.000998658	0.000919114			1688.35	0.000750295	0.000919114	0.000722055	0.000738057	0.000797318	0.000749802		1688.35	0.000750295	0.000919114	0.000881161	0.000922384	0.000941367	0.000904488
1688.03	0.00079575	0.000863347	0.000967728	0.00105194	0.0009674			1688.03	0.00079575	0.0009674	0.000763217	0.000780592	0.000842088	0.000793838		1688.03	0.00079575	0.0009674	0.000928747	0.000972639	0.000990875	0.000952727
1687.7	0.000842977	0.000911071	0.00101859	0.00110702	0.00101742			1687.7	0.000842977	0.00101742	0.000805891	0.000824929	0.000888557	0.00083949		1687.7	0.000842977	0.00101742	0.000978027	0.00102486	0.00104215	0.00100272
1687.38	0.000892107	0.000960701	0.00107129	0.00116395	0.00106919			1687.38	0.000892107	0.00106919	0.000850019	0.000871218	0.000936726	0.0008868		1687.38	0.000892107	0.00106919	0.0010291	0.00107943	0.00109525	0.00105465
1687.06	0.000943316	0.00101237	0.001126	0.00122277	0.00112281			1687.06	0.000943316	0.00112281	0.000895794	0.000919672	0.000986631	0.000935915		1687.06	0.000943316	0.00112281	0.00108196	0.00113649	0.00115025	0.00110873
1686.74	0.000996681	0.00106605	0.00118282	0.00128353	0.00117833			1686.74	0.000996681	0.00117833	0.000943218	0.000970197	0.00103823	0.000986854		1686.74	0.000996681	0.00117833	0.00113656	0.00119599	0.0012072	0.00116507
1686.42	0.0010522	0.00112185	0.0012418	0.00134628	0.00123582			1686.42	0.0010522	0.00123582	0.000992377	0.00102283	0.00109156	0.00103965		1686.42	0.0010522	0.00123582	0.00119291	0.00125771	0.00126616	0.00122375
1686.1	0.00110998	0.00117981	0.00130295	0.0014111	0.00129544			1686.1	0.00110998	0.00129544	0.00104342	0.00107733	0.00114664	0.00109439		1686.1	0.00110998	0.00129544	0.00125107	0.00132171	0.00132721	0.00128479
1685.78	0.00117018	0.00124007	0.0013664	0.00147815	0.00135729			1685.78	0.00117018	0.00135729	0.0010965	0.00113384	0.0012037	0.00115118		1685.78	0.00117018	0.00135729	0.00131123	0.00138799	0.00139051	0.00134832
1685.45	0.00123259	0.00130267	0.00143205	0.00154749	0.00142141			1685.45	0.00123259	0.00142141	0.0011517	0.00119223	0.00126286	0.00121009		1685.45	0.00123259	0.00142141	0.00137337	0.00145614	0.00145605	0.00141427
1685.13	0.00129766	0.00136786	0.00150009	0.00161935	0.00148801			1685.13	0.00129766	0.00148801	0.00120936	0.00125284	0.00132439	0.00127143		1685.13	0.00129766	0.00148801	0.00143788	0.0015268	0.00152411	0.00148291
1684.81	0.00136527	0.00143574	0.00157054	0.00169381	0.0015571			1684.81	0.00136527	0.0015571	0.00126955	0.00131567	0.00138845	0.00133527		1684.81	0.00136527	0.0015571	0.00150499	0.00159991	0.00159477	0.00155414
1684.49	0.00143572	0.00150646	0.00164354	0.00177098	0.00162887			1684.49	0.00143572	0.00162887	0.00133253	0.00138108	0.00145521	0.00140188		1684.49	0.00143572	0.00162887	0.001575	0.00167596	0.00166826	0.00162829
1684.17	0.00150916	0.00158016	0.0017192	0.00185093	0.00170335			1684.17	0.00150916	0.00170335	0.00139841	0.00144937	0.00152481	0.00147134		1684.17	0.00150916	0.00170335	0.00164819	0.00175531	0.00174472	0.00170541
1683.85	0.00158577	0.00165694	0.00179761	0.00193365	0.00178061			1683.85	0.00158577	0.00178061	0.0014673	0.00152071	0.00159733	0.00154374		1683.85	0.00158577	0.00178061	0.00172488	0.00183819	0.00182432	0.00178563
1683.53	0.0016657	0.00173687	0.00187888	0.00201911	0.00186076			1683.53	0.0016657	0.00186076	0.00153924	0.00159525	0.00167284	0.00161907		1683.53	0.0016657	0.00186076	0.00180516	0.00192469	0.00190716	0.00186903
1683.2	0.00174899	0.00182003	0.00196314	0.00210733	0.00194384			1683.2	0.00174899	0.00194384	0.00161435	0.00167311	0.00175142	0.00169736		1683.2	0.00174899	0.00194384	0.00188913	0.002015	0.00199331	0.00195563
1682.88	0.00183567	0.00190648	0.00205036	0.00219824	0.00202983			1682.88	0.00183567	0.00202983	0.00169266	0.00175421	0.00183311	0.00177852		1682.88	0.00183567	0.00202983	0.00197664	0.00210888	0.00208268	0.00204522
1682.56	0.0019257	0.00199631	0.00214062	0.00229188	0.00211874			1682.56	0.0019257	0.00211874	0.00177426	0.0018385	0.00191804	0.00186255		1682.56	0.0019257	0.00211874	0.00206754	0.00220631	0.00217513	0.00213778
1682.24	0.00201901	0.00208961	0.00223407	0.00238827	0.00221048			1682.24	0.00201901	0.00221048	0.00185916	0.00192592	0.0020063	0.0019494		1682.24	0.00201901	0.00221048	0.00216157	0.00230698	0.0022705	0.0022331
1681.92	0.00211553	0.00218644	0.00233071	0.00248743	0.00230502			1681.92	0.00211553	0.00230502	0.00194746	0.0020163	0.00209793	0.00203904		1681.92	0.00211553	0.00230502	0.0022584	0.00241064	0.00236854	0.00233107
1681.6	0.00221543	0.00228692	0.00243076	0.00258946	0.00240246			1681.6	0.00221543	0.00240246	0.0020393	0.0021098	0.00219314	0.00213154		1681.6	0.00221543	0.00240246	0.00235813	0.00251724	0.00246927	0.00243177
1681.28	0.00231849	0.00239111	0.00253421	0.00269434	0.00250271			1681.28	0.00231849	0.00250271	0.00213474	0.00220638	0.00229201	0.00222692		1681.28	0.00231849	0.00250271	0.00246062	0.00262657	0.00257258	0.00253512
1680.95	0.00242488	0.00249917	0.0026412	0.0028021	0.00260586			1680.95	0.00242488	0.00260586	0.002234	0.00230629	0.00239471	0.0023253		1680.95	0.00242488	0.00260586	0.00256618	0.00273875	0.00267864	0.00264127
1680.63	0.0025347	0.00261113	0.00275172	0.00291276	0.00271197			1680.63	0.0025347	0.00271197	0.00233728	0.00240975	0.00250145	0.00242675		1680.63	0.0025347	0.00271197	0.00267523	0.00285361	0.00278764	0.00275033
1680.31	0.00264798	0.00272702	0.00286573	0.00302618	0.00282095			1680.31	0.00264798	0.00282095	0.00244483	0.00251687	0.00261232	0.00253138		1680.31	0.00264798	0.00282095	0.00278812	0.00297156	0.00289976	0.00286227
1679.99	0.00276465	0.00284685	0.00298308	0.00314222	0.00293271			1679.99	0.00276465	0.00293271	0.00255677	0.00262778	0.0027274	0.00263908		1679.99	0.00276465	0.00293271	0.00290505	0.00309266	0.00301514	0.00297705
1679.67	0.00288454	0.0029705	0.00310362	0.00326065	0.00304689			1679.67	0.00288454	0.00304689	0.0026732	0.00274221	0.00284664	0.00274974		1679.67	0.00288454	0.00304689	0.00302592	0.00321661	0.00313376	0.0030944
1679.35	0.00300748	0.00309785	0.00322711	0.00338129	0.00316327			1679.35	0.00300748	0.00316327	0.00279407	0.00286005	0.00296994	0.00286315		1679.35	0.00300748	0.00316327	0.00315054	0.00334345	0.00325552	0.00321415
1679.03	0.00313314	0.00322867	0.00335328	0.00350386	0.00328151			1679.03	0.00313314	0.00328151	0.00291922	0.00298082	0.00309711	0.00297907		1679.03	0.00313314	0.00328151	0.00327847	0.00347286	0.00338019	0.00333602
1678.7	0.00326132	0.00336277	0.00348192	0.00362821	0.00340139			1678.7	0.00326132	0.00340139	0.0030484	0.00310425	0.00322796	0.00309726		1678.7	0.00326132	0.00340139	0.00340933	0.00360485	0.00350747	0.00345992
1678.38	0.00339172	0.00349986	0.00361268	0.00375411	0.00352265			1678.38	0.00339172	0.00352265	0.00318121	0.00322997	0.00336213	0.00321751		1678.38	0.00339172	0.00352265	0.00354256	0.00373884	0.00363705	0.00358568
1678.06	0.00352441	0.00363967	0.00374545	0.00388143	0.00364527			1678.06	0.00352441	0.00364527	0.00331742	0.00335781	0.0034994	0.00333971		1678.06	0.00352441	0.00364527	0.00367811	0.00387513	0.00376874	0.00371342
1677.74	0.00365924	0.00378193	0.00387994	0.00400998	0.00376914			1677.74	0.00365924	0.00376914	0.00345666	0.00348749	0.00363941	0.00346376		1677.74	0.00365924	0.00376914	0.0038157	0.00401314	0.00390229	0.00384294
1677.42	0.00379635	0.00392637	0.004016	0.00413964	0.00389424			1677.42	0.00379635	0.00389424	0.00359873	0.00361888	0.00378191	0.00358968		1677.42	0.00379635	0.00389424	0.00395542	0.00415317	0.00403764	0.00397433
1677.1	0.00393566	0.00407267	0.00415355	0.00427027	0.0040206			1677.1	0.00393566	0.0040206	0.00374344	0.00375185	0.00392668	0.00371738		1677.1	0.00393566	0.0040206	0.0040973	0.00429484	0.00417481	0.00410733
1676.78	0.00407733	0.0042207	0.00429257	0.00440179	0.00414822			1676.78	0.00407733	0.00414822	0.00389079	0.00388635	0.00407357	0.003847		1676.78	0.00407733	0.00414822	0.00424137	0.00443831	0.00431382	0.00424189
1676.45	0.00422128	0.00437021	0.00443301	0.00453412	0.00427704			1676.45	0.00422128	0.00427704	0.00404075	0.00402246	0.00422259	0.00397856		1676.45	0.00422128	0.00427704	0.00438772	0.00458361	0.00445485	0.00437781
1676.13	0.00436734	0.00452106	0.00457483	0.00466716	0.00440709			1676.13	0.00436734	0.00440709	0.00419335	0.00416024	0.00437373	0.00411212		1676.13	0.00436734	0.00440709	0.00453628	0.00473083	0.00459792	0.00451513
1675.81	0.00451557	0.004673	0.0047179	0.00480075	0.0045383			1675.81	0.00451557	0.0045383	0.00434861	0.00429978	0.00452692	0.00424768		1675.81	0.00451557	0.0045383	0.00468707	0.00488029	0.00474303	0.00465386
1675.49	0.00466552	0.00482566	0.00486191	0.00493462	0.00467045			1675.49	0.00466552	0.00467045	0.00450621	0.00444094	0.004682	0.00438506		1675.49	0.00466552	0.00467045	0.00483981	0.00503192	0.00488986	0.00479382
1675.17	0.00481695	0.00497865	0.00500651	0.00506842	0.00480346			1675.17	0.00481695	0.00480346	0.00466579	0.00458369	0.00483864	0.00452403		1675.17	0.00481695	0.00480346	0.00499438	0.0051856	0.00503801	0.00493504
1674.85	0.0049694	0.00513131	0.00515122	0.0052017	0.00493706			1674.85	0.0049694	0.00493706	0.0048267	0.00472763	0.00499621	0.00466417		1674.85	0.0049694	0.00493706	0.00515037	0.00534124	0.00518678	0.00507722
1674.53	0.0051221	0.00528297	0.00529541	0.00533397	0.00507078			1674.53	0.0051221	0.00507078	0.00498797	0.004872	0.00515387	0.00480482		1674.53	0.0051221	0.00507078	0.00530694	0.0054978	0.00533531	0.00521977
1674.21	0.00527423	0.00543283	0.00543838	0.00546469	0.00520425			1674.21	0.00527423	0.00520425	0.0051486	0.00501595	0.0053106	0.00494533		1674.21	0.00527423	0.00520425	0.0054632	0.00565435	0.00548268	0.00536204
1673.88	0.00542467	0.00558009	0.00557936	0.0055934	0.00533689			1673.88	0.00542467	0.00533689	0.00530737	0.00515846	0.00546537	0.00508493		1673.88	0.00542467	0.00533689	0.00561789	0.00580947	0.00562789	0.00550317
1673.56	0.00557235	0.00572398	0.00571761	0.00571963	0.00546814			1673.56	0.00557235	0.00546814	0.0054631	0.0052985	0.00561716	0.00522286		1673.56	0.00557235	0.00546814	0.00576971	0.00596188	0.00577007	0.00564234
1673.24	0.00571608	0.00586371	0.00585229	0.00584295	0.00559733			1673.24	0.00571608	0.00559733	0.00561457	0.00543506	0.00576505	0.00535838		1673.24	0.00571608	0.00559733	0.0059172	0.00610994	0.00590839	0.00577874
1672.92	0.00585502	0.00599862	0.00598272	0.00596295	0.00572384			1672.92	0.00585502	0.00572384	0.00576073	0.00556741	0.00590831	0.00549089		1672.92	0.00585502	0.00572384	0.00605917	0.00625265	0.00604217	0.0059117
1672.6	0.00598817	0.00612807	0.00610824	0.00607924	0.00584705			1672.6	0.00598817	0.00584705	0.00590065	0.00569486	0.00604633	0.00561968		1672.6	0.00598817	0.00584705	0.00619454	0.00638921	0.00617085	0.00604066
1672.28	0.00611529	0.00625177	0.00622853	0.00619147	0.0059665			1672.28	0.00611529	0.0059665	0.00603371	0.00581722	0.00617883	0.00574432		1672.28	0.00611529	0.0059665	0.00632281	0.00651913	0.00629414	0.00616528
1671.96	0.00623611	0.00636939	0.00634325	0.00629931	0.00608172			1671.96	0.00623611	0.00608172	0.00615942	0.00593402	0.00630553	0.00586435		1671.96	0.00623611	0.00608172	0.00644374	0.00664217	0.00641177	0.00628513
1671.63	0.00635051	0.00648091	0.00645236	0.00640249	0.00619238			1671.63	0.00635051	0.00619238	0.00627763	0.00604505	0.00642633	0.00597937		1671.63	0.00635051	0.00619238	0.00655712	0.00675821	0.00652358	0.00639986
1671.31	0.00645894	0.00658654	0.00655606	0.0065009	0.00629832			1671.31	0.00645894	0.00629832	0.00638849	0.0061502	0.00654138	0.00608921		1671.31	0.00645894	0.00629832	0.00666343	0.00686765	0.00662967	0.00650936
1670.99	0.00656167	0.00668666	0.00665466	0.00659451	0.00639948			1670.99	0.00656167	0.00639948	0.0064923	0.00624945	0.00665087	0.00619375		1670.99	0.00656167	0.00639948	0.006763	0.00697056	0.00673023	0.00661346
1670.67	0.00665903	0.00678175	0.00674861	0.00668345	0.0064959			1670.67	0.00665903	0.0064959	0.00658962	0.00634286	0.00675518	0.00629308		1670.67	0.00665903	0.0064959	0.00685645	0.00706735	0.00682563	0.00671229
1670.35	0.00675184	0.00687253	0.00683854	0.00676806	0.00658792			1670.35	0.00675184	0.00658792	0.00668126	0.00643082	0.00685487	0.00638752		1670.35	0.00675184	0.00658792	0.00694456	0.00715876	0.00691642	0.0068063
1670.03	0.00684035	0.00695968	0.00692497	0.00684872	0.00667578			1670.03	0.00684035	0.00667578	0.00676792	0.00651383	0.00695057	0.00647751		1670.03	0.00684035	0.00667578	0.00702802	0.00724567	0.00700317	0.00689596
1669.71	0.00692531	0.0070439	0.00700848	0.00692588	0.00675991			1669.71	0.00692531	0.00675991	0.00685047	0.00659257	0.00704294	0.00656366		1669.71	0.00692531	0.00675991	0.00710767	0.00732888	0.00708665	0.00698208
1669.38	0.00700734	0.00712587	0.00708965	0.00700006	0.00684079			1669.38	0.00700734	0.00684079	0.00692968	0.00666786	0.00713261	0.00664657		1669.38	0.00700734	0.00684079	0.00718447	0.00740964	0.00716751	0.00706536
1669.06	0.00708702	0.00720616	0.00716879	0.00707162	0.00691884			1669.06	0.00708702	0.00691884	0.00700635	0.00674045	0.00722018	0.00672675		1669.06	0.00708702	0.00691884	0.00725904	0.00748903	0.00724639	0.00714655
1668.74	0.00716504	0.00728515	0.00724621	0.00714085	0.00699434			1668.74	0.00716504	0.00699434	0.0070811	0.00681084	0.00730599	0.0068046		1668.74	0.00716504	0.00699434	0.00733203	0.00756781	0.00732368	0.00722599
1668.42	0.00724196	0.00736318	0.00732217	0.00720788	0.00706752			1668.42	0.00724196	0.00706752	0.00715445	0.00687938	0.00739038	0.00688034		1668.42	0.00724196	0.00706752	0.00740388	0.00764649	0.00739982	0.00730404
1668.1	0.00731833	0.00744045	0.00739676	0.00727277	0.00713853			1668.1	0.00731833	0.00713853	0.00722687	0.00694629	0.00747352	0.00695405		1668.1	0.00731833	0.00713853	0.00747513	0.00772537	0.007475	0.00738076
1667.78	0.00739463	0.00751704	0.00747013	0.00733545	0.00720736			1667.78	0.00739463	0.00720736	0.0072987	0.00701163	0.00755556	0.00702566		1667.78	0.00739463	0.00720736	0.00754602	0.00780415	0.00754946	0.00745621
1667.46	0.00747121	0.00759298	0.00754238	0.0073958	0.007274			1667.46	0.00747121	0.007274	0.00737019	0.0070754	0.00763658	0.00709503		1667.46	0.00747121	0.007274	0.00761693	0.0078827	0.00762323	0.00753024
1667.13	0.0075481	0.00766832	0.00761365	0.00745374	0.00733835			1667.13	0.0075481	0.00733835	0.00744151	0.00713759	0.0077167	0.00716207		1667.13	0.0075481	0.00733835	0.00768802	0.00796071	0.00769644	0.00760291
1666.81	0.00762564	0.00774309	0.00768409	0.0075092	0.0074005			1666.81	0.00762564	0.0074005	0.007513	0.00719844	0.00779612	0.00722675		1666.81	0.00762564	0.0074005	0.00775971	0.00803831	0.00776931	0.00767438
1666.49	0.00770377	0.00781733	0.00775375	0.00756215	0.00746026			1666.49	0.00770377	0.00746026	0.00758471	0.00725789	0.00787493	0.00728904		1666.49	0.00770377	0.00746026	0.00783214	0.00811547	0.00784186	0.00774457
1666.17	0.0077827	0.00789124	0.00782281	0.00761273	0.00751793			1666.17	0.0077827	0.00751793	0.00765705	0.00731639	0.00795346	0.00734913		1666.17	0.0077827	0.00751793	0.00790569	0.00819324	0.00791437	0.0078138
1665.85	0.00786245	0.00796493	0.00789132	0.00766105	0.0075735			1665.85	0.00786245	0.0075735	0.00773027	0.00737407	0.00803183	0.00740713		1665.85	0.00786245	0.0075735	0.00798039	0.00827182	0.00798691	0.00788207
1665.53	0.0079434	0.00803868	0.00795943	0.0077074	0.00762731			1665.53	0.0079434	0.00762731	0.00780467	0.00743123	0.00811033	0.00746334		1665.53	0.0079434	0.00762731	0.00805646	0.00835215	0.00805972	0.00794973
1665.21	0.00802562	0.00811272	0.0080273	0.00775219	0.00767958			1665.21	0.00802562	0.00767958	0.00788057	0.00748822	0.00818922	0.00751814		1665.21	0.00802562	0.00767958	0.00813412	0.00843448	0.00813296	0.00801685
1664.88	0.00810933	0.00818722	0.00809512	0.00779583	0.00773073			1664.88	0.00810933	0.00773073	0.00795809	0.00754518	0.00826872	0.00757186		1664.88	0.00810933	0.00773073	0.00821344	0.00851873	0.00820686	0.00808343
1664.56	0.00819483	0.00826238	0.0081631	0.00783881	0.0077811			1664.56	0.00819483	0.0077811	0.00803748	0.00760251	0.00834902	0.00762498		1664.56	0.00819483	0.0077811	0.00829469	0.00860492	0.00828172	0.0081498
1664.24	0.008282	0.00833819	0.00823145	0.0078816	0.00783098			1664.24	0.008282	0.00783098	0.00811874	0.00766039	0.00843027	0.00767786		1664.24	0.008282	0.00783098	0.00837796	0.00869234	0.00835769	0.0082159
1663.92	0.008371	0.00841471	0.00830037	0.00792466	0.00788081			1663.92	0.008371	0.00788081	0.00820189	0.00771925	0.00851256	0.00773093		1663.92	0.008371	0.00788081	0.00846347	0.0087808	0.008435	0.00828199
1663.6	0.00846166	0.00849184	0.00837004	0.00796832	0.00793089			1663.6	0.00846166	0.00793089	0.00828705	0.00777944	0.00859592	0.00778455		1663.6	0.00846166	0.00793089	0.00855144	0.00887034	0.00851379	0.00834829
1663.28	0.008554	0.00856942	0.00844051	0.00801278	0.00798149			1663.28	0.008554	0.00798149	0.0083742	0.00784125	0.00868031	0.00783897		1663.28	0.008554	0.00798149	0.00864193	0.0089613	0.00859402	0.00841497
1662.96	0.00864781	0.00864718	0.00851168	0.00805811	0.00803277			1662.96	0.00864781	0.00803277	0.00846334	0.00790492	0.00876556	0.0078943		1662.96	0.00864781	0.00803277	0.00873497	0.00905413	0.00867548	0.00848215
1662.63	0.00874286	0.00872475	0.00858332	0.00810421	0.00808473			1662.63	0.00874286	0.00808473	0.00855439	0.00797035	0.00885134	0.00795044		1662.63	0.00874286	0.00808473	0.00883019	0.00914945	0.00875768	0.00854977
1662.31	0.00883878	0.00880168	0.00865494	0.00815077	0.00813715			1662.31	0.00883878	0.00813715	0.00864696	0.00803714	0.00893714	0.00800708		1662.31	0.00883878	0.00813715	0.00892714	0.00924728	0.00883994	0.0086175
1661.99	0.00893521	0.00887744	0.00872603	0.00819744	0.00818974			1661.99	0.00893521	0.00818974	0.00874063	0.00810472	0.00902241	0.0080638		1661.99	0.00893521	0.00818974	0.00902518	0.00934777	0.00892145	0.00868499
1661.67	0.00903161	0.00895136	0.00879587	0.00824372	0.00824191			1661.67	0.00903161	0.00824191	0.00883469	0.00817202	0.00910632	0.00811996		1661.67	0.00903161	0.00824191	0.00912346	0.00944962	0.00900125	0.0087514
1661.35	0.00912733	0.00902285	0.00886374	0.00828912	0.00829306			1661.35	0.00912733	0.00829306	0.00892829	0.00823798	0.00918804	0.00817489		1661.35	0.00912733	0.00829306	0.00922106	0.00955191	0.00907841	0.00881608
1661.03	0.00922169	0.00909132	0.00892886	0.00833315	0.00834249			1661.03	0.00922169	0.00834249	0.00902045	0.00830155	0.00926676	0.00822786		1661.03	0.00922169	0.00834249	0.00931707	0.00965308	0.00915211	0.00887816
1660.71	0.00931425	0.0091563	0.00899077	0.00837544	0.00838976			1660.71	0.00931425	0.00838976	0.00911038	0.00836188	0.00934176	0.00827836		1660.71	0.00931425	0.00838976	0.00941089	0.00975218	0.00922167	0.0089371
1660.38	0.00940433	0.00921736	0.00904886	0.00841559	0.00843436			1660.38	0.00940433	0.00843436	0.00919718	0.0084183	0.00941226	0.0083258		1660.38	0.00940433	0.00843436	0.00950165	0.00984803	0.00928647	0.00899229
1660.06	0.00949138	0.00927419	0.00910273	0.00845334	0.00847599			1660.06	0.00949138	0.00847599	0.00928023	0.00847022	0.0094777	0.00836979		1660.06	0.00949138	0.00847599	0.00958874	0.00993977	0.00934593	0.00904316
1659.74	0.00957503	0.00932655	0.00915214	0.00848845	0.00851442			1659.74	0.00957503	0.00851442	0.009359	0.00851749	0.00953761	0.00841003		1659.74	0.00957503	0.00851442	0.0096715	0.0100268	0.00939963	0.00908935
1659.42	0.00965489	0.00937431	0.00919695	0.00852075	0.00854963			1659.42	0.00965489	0.00854963	0.00943304	0.00856004	0.00959168	0.00844628		1659.42	0.00965489	0.00854963	0.00974938	0.0101087	0.00944716	0.00913067
1659.1	0.00973081	0.00941745	0.00923712	0.00855023	0.00858164			1659.1	0.00973081	0.00858164	0.00950222	0.00859783	0.0096398	0.00847856		1659.1	0.00973081	0.00858164	0.00982188	0.0101849	0.00948833	0.00916679
1658.78	0.00980279	0.00945608	0.00927292	0.00857699	0.00861072			1658.78	0.00980279	0.00861072	0.00956633	0.00863125	0.00968214	0.00850696		1658.78	0.00980279	0.00861072	0.00988884	0.0102555	0.00952317	0.00919792
1658.46	0.00987091	0.00949044	0.00930464	0.00860127	0.00863717			1658.46	0.00987091	0.00863717	0.00962538	0.00866081	0.00971904	0.00853179		1658.46	0.00987091	0.00863717	0.00995021	0.0103205	0.00955197	0.00922421
1658.13	0.00993523	0.0095209	0.00933277	0.00862344	0.00866146			1658.13	0.00993523	0.00866146	0.00967921	0.00868697	0.00975105	0.00855345		1658.13	0.00993523	0.00866146	0.0100062	0.01038	0.00957517	0.00924624
1657.81	0.00999591	0.00954796	0.00935793	0.00864399	0.0086841			1657.81	0.00999591	0.0086841	0.00972788	0.00871058	0.00977894	0.00857252		1657.81	0.00999591	0.0086841	0.0100572	0.0104348	0.00959357	0.00926477
1657.49	0.0100528	0.00957214	0.00938071	0.00866339	0.00870554			1657.49	0.0100528	0.00870554	0.0097712	0.00873199	0.00980346	0.00858952		1657.49	0.0100528	0.00870554	0.0101034	0.0104853	0.00960794	0.00928046
1657.17	0.0101059	0.00959406	0.00940183	0.00868227	0.00872642			1657.17	0.0101059	0.00872642	0.00980917	0.00875199	0.00982555	0.00860521		1657.17	0.0101059	0.00872642	0.0101451	0.0105323	0.00961924	0.00929422
1656.85	0.0101551	0.00961445	0.009422	0.00870119	0.00874728			1656.85	0.0101551	0.00874728	0.00984187	0.0087709	0.00984612	0.00862021		1656.85	0.0101551	0.00874728	0.0101825	0.0105764	0.00962846	0.00930684
1656.53	0.0102004	0.00963392	0.00944197	0.00872073	0.00876868			1656.53	0.0102004	0.00876868	0.00986948	0.0087893	0.00986606	0.0086353		1656.53	0.0102004	0.00876868	0.010216	0.0106176	0.00963651	0.00931911
1656.21	0.0102421	0.00965328	0.00946254	0.00874151	0.00879115			1656.21	0.0102421	0.00879115	0.00989269	0.00880765	0.00988638	0.00865129		1656.21	0.0102421	0.00879115	0.0102461	0.0106563	0.00964445	0.00933164
1655.88	0.0102809	0.00967331	0.00948443	0.0087641	0.00881525			1655.88	0.0102809	0.00881525	0.00991237	0.0088265	0.00990802	0.00866897		1655.88	0.0102809	0.00881525	0.0102734	0.0106929	0.00965329	0.0093452
1655.56	0.0103175	0.00969476	0.00950843	0.00878907	0.00884152			1655.56	0.0103175	0.00884152	0.00992971	0.00884655	0.00993199	0.00868915		1655.56	0.0103175	0.00884152	0.010299	0.0107276	0.00966403	0.00936044
1655.24	0.0103533	0.00971851	0.0095353	0.00881697	0.00887041			1655.24	0.0103533	0.00887041	0.00994624	0.00886863	0.0099593	0.00871257		1655.24	0.0103533	0.00887041	0.0103242	0.0107613	0.00967762	0.00937802
1654.92	0.0103895	0.00974535	0.0095657	0.00884826	0.00890238			1654.92	0.0103895	0.00890238	0.00996358	0.0088936	0.00999091	0.00873991		1654.92	0.0103895	0.00890238	0.0103505	0.010795	0.00969498	0.00939872
1654.6	0.0104276	0.00977619	0.00960033	0.00888341	0.00893794			1654.6	0.0104276	0.00893794	0.00998348	0.00892247	0.0100278	0.00877188		1654.6	0.0104276	0.00893794	0.0103794	0.0108307	0.00971695	0.00942336
1654.28	0.0104691	0.00981186	0.00963985	0.00892287	0.00897753			1654.28	0.0104691	0.00897753	0.0100076	0.00895629	0.010071	0.00880909		1654.28	0.0104691	0.00897753	0.0104128	0.0108699	0.00974431	0.00945282
1653.96	0.0105152	0.00985316	0.00968477	0.00896698	0.00902154			1653.96	0.0105152	0.00902154	0.0100375	0.0089959	0.0101213	0.00885211		1653.96	0.0105152	0.00902154	0.0104521	0.0109149	0.00977768	0.00948774
1653.64	0.0105673	0.00990081	0.00973562	0.00901607	0.00907053			1653.64	0.0105673	0.00907053	0.0100746	0.00904221	0.0101793	0.00890145		1653.64	0.0105673	0.00907053	0.0104988	0.0109673	0.0098176	0.00952896
1653.31	0.0106263	0.00995531	0.00979271	0.00907039	0.00912481			1653.31	0.0106263	0.00912481	0.0101199	0.00909568	0.0102456	0.0089575		1653.31	0.0106263	0.00912481	0.0105541	0.0110284	0.00986452	0.00957697
1652.99	0.0106929	0.010017	0.00985613	0.00913005	0.00918461			1652.99	0.0106929	0.00918461	0.0101743	0.00915669	0.0103203	0.00902045		1652.99	0.0106929	0.00918461	0.0106188	0.0110991	0.00991864	0.00963197
1652.67	0.010768	0.0100861	0.00992597	0.00919514	0.00925016			1652.67	0.010768	0.00925016	0.0102383	0.0092253	0.0104035	0.00909043		1652.67	0.010768	0.00925016	0.0106934	0.0111795	0.00998015	0.00969421
1652.35	0.0108518	0.0101623	0.0100021	0.0092657	0.00932145			1652.35	0.0108518	0.00932145	0.010312	0.00930136	0.010495	0.00916733		1652.35	0.0108518	0.00932145	0.0107779	0.0112693	0.0100489	0.00976338
1652.03	0.0109444	0.0102457	0.0100844	0.00934173	0.00939847			1652.03	0.0109444	0.00939847	0.0103957	0.00938477	0.0105946	0.00925101		1652.03	0.0109444	0.00939847	0.0108721	0.0113684	0.0101248	0.00983941
1651.71	0.011046	0.0103359	0.0101727	0.00942328	0.00948125			1651.71	0.011046	0.00948125	0.0104893	0.0094753	0.0107018	0.00934145		1651.71	0.011046	0.00948125	0.010976	0.0114763	0.0102078	0.00992211
1651.39	0.0111562	0.0104327	0.0102669	0.00951036	0.00956974			1651.39	0.0111562	0.00956974	0.0105926	0.00957285	0.0108164	0.00943854		1651.39	0.0111562	0.00956974	0.0110888	0.0115925	0.0102974	0.0100113
1651.06	0.0112745	0.0105358	0.0103669	0.00960307	0.00966399			1651.06	0.0112745	0.00966399	0.0107056	0.00967738	0.0109379	0.00954233		1651.06	0.0112745	0.00966399	0.0112104	0.0117167	0.0103934	0.0101067
1650.74	0.011401	0.0106449	0.0104726	0.00970159	0.00976425			1650.74	0.011401	0.00976425	0.0108282	0.0097891	0.0110662	0.00965314		1650.74	0.011401	0.00976425	0.0113405	0.0118486	0.0104958	0.0102086
1650.42	0.0115348	0.0107599	0.0105838	0.00980601	0.00987055			1650.42	0.0115348	0.00987055	0.01096	0.00990797	0.0112007	0.00977109		1650.42	0.0115348	0.00987055	0.0114785	0.0119877	0.010604	0.0103168
1650.1	0.0116758	0.0108805	0.0107005	0.00991655	0.00998323			1650.1	0.0116758	0.00998323	0.0111008	0.0100343	0.0113412	0.00989662		1650.1	0.0116758	0.00998323	0.0116243	0.0121337	0.0107183	0.0104316
1649.78	0.0118237	0.0110065	0.0108224	0.0100334	0.0101025			1649.78	0.0118237	0.0101025	0.0112501	0.0101683	0.0114873	0.01003		1649.78	0.0118237	0.0101025	0.0117774	0.012286	0.0108385	0.0105531
1649.46	0.011978	0.0111378	0.0109494	0.0101566	0.0102287			1649.46	0.011978	0.0102287	0.0114076	0.0103101	0.0116388	0.0101717		1649.46	0.011978	0.0102287	0.0119373	0.0124442	0.0109647	0.0106815
1649.14	0.0121386	0.0112741	0.0110816	0.0102865	0.0103622			1649.14	0.0121386	0.0103622	0.0115727	0.0104603	0.0117954	0.0103221		1649.14	0.0121386	0.0103622	0.0121037	0.012608	0.0110971	0.0108172
1648.81	0.0123051	0.0114152	0.0112189	0.0104231	0.0105033			1648.81	0.0123051	0.0105033	0.011745	0.010619	0.0119569	0.0104814		1648.81	0.0123051	0.0105033	0.0122761	0.0127769	0.011236	0.0109605
1648.49	0.0124773	0.0115613	0.0113614	0.0105665	0.0106522			1648.49	0.0124773	0.0106522	0.0119242	0.0107867	0.0121233	0.0106499		1648.49	0.0124773	0.0106522	0.0124539	0.0129508	0.0113815	0.0111117
1648.17	0.0126547	0.0117121	0.0115094	0.0107167	0.010809			1648.17	0.0126547	0.010809	0.0121099	0.0109639	0.0122946	0.0108279		1648.17	0.0126547	0.010809	0.0126371	0.0131294	0.0115337	0.0112713
1647.85	0.0128374	0.0118678	0.011663	0.0108738	0.010974			1647.85	0.0128374	0.010974	0.0123021	0.0111508	0.0124709	0.0110153		1647.85	0.0128374	0.010974	0.0128255	0.0133128	0.0116929	0.0114395
1647.53	0.0130253	0.0120288	0.0118225	0.0110377	0.0111471			1647.53	0.0130253	0.0111471	0.0125009	0.0113479	0.0126526	0.0112122		1647.53	0.0130253	0.0111471	0.0130188	0.0135011	0.0118589	0.0116164
1647.21	0.0132183	0.0121954	0.011988	0.0112084	0.011328			1647.21	0.0132183	0.011328	0.0127067	0.0115552	0.0128403	0.0114185		1647.21	0.0132183	0.011328	0.0132173	0.0136944	0.0120319	0.011802
1646.89	0.0134166	0.0123681	0.0121598	0.0113857	0.0115166			1646.89	0.0134166	0.0115166	0.0129197	0.0117729	0.0130344	0.0116338		1646.89	0.0134166	0.0115166	0.0134209	0.0138929	0.0122115	0.011996
1646.56	0.01362	0.0125472	0.0123379	0.0115691	0.0117123			1646.56	0.01362	0.0117123	0.0131405	0.0120005	0.0132355	0.0118575		1646.56	0.01362	0.0117123	0.0136294	0.0140963	0.0123974	0.0121979
1646.24	0.0138284	0.0127333	0.012522	0.0117581	0.0119142			1646.24	0.0138284	0.0119142	0.0133694	0.0122376	0.013444	0.0120887		1646.24	0.0138284	0.0119142	0.0138427	0.0143045	0.0125891	0.0124069
1645.92	0.0140415	0.0129263	0.0127119	0.0119518	0.0121211			1645.92	0.0140415	0.0121211	0.0136065	0.0124833	0.0136601	0.0123263		1645.92	0.0140415	0.0121211	0.0140607	0.0145172	0.0127857	0.0126217
1645.6	0.0142586	0.0131262	0.0129067	0.0121491	0.0123317			1645.6	0.0142586	0.0123317	0.0138519	0.0127362	0.013884	0.0125686		1645.6	0.0142586	0.0123317	0.014283	0.0147332	0.0129863	0.0128407
1645.28	0.014479	0.0133327	0.0131058	0.0123485	0.0125443			1645.28	0.014479	0.0125443	0.0141053	0.0129951	0.0141155	0.0128139		1645.28	0.014479	0.0125443	0.0145091	0.0149515	0.0131897	0.0130622
1644.96	0.0147024	0.0135455	0.0133083	0.0125489	0.0127575			1644.96	0.0147024	0.0127575	0.0143661	0.0132583	0.0143543	0.0130604		1644.96	0.0147024	0.0127575	0.0147388	0.0151714	0.0133951	0.0132845
1644.64	0.014928	0.0137639	0.0135132	0.0127487	0.0129694			1644.64	0.014928	0.0129694	0.0146338	0.0135244	0.0146	0.0133064		1644.64	0.014928	0.0129694	0.0149715	0.0153916	0.0136012	0.0135058
1644.31	0.015155	0.0139871	0.0137197	0.012947	0.013179			1644.31	0.015155	0.013179	0.0149076	0.0137918	0.0148521	0.0135504		1644.31	0.015155	0.013179	0.0152065	0.0156112	0.0138072	0.0137248
1643.99	0.0153827	0.0142144	0.0139269	0.0131426	0.013385			1643.99	0.0153827	0.013385	0.0151865	0.0140592	0.0151099	0.0137911		1643.99	0.0153827	0.013385	0.015443	0.0158293	0.0140121	0.0139401
1643.67	0.0156101	0.0144446	0.0141339	0.0133348	0.0135867			1643.67	0.0156101	0.0135867	0.0154692	0.0143251	0.0153725	0.0140273		1643.67	0.0156101	0.0135867	0.0156796	0.0160452	0.0142151	0.0141509
1643.35	0.0158358	0.0146763	0.0143396	0.0135228	0.0137832			1643.35	0.0158358	0.0137832	0.0157543	0.014588	0.0156386	0.0142581		1643.35	0.0158358	0.0137832	0.0159147	0.0162576	0.014415	0.0143564
1643.03	0.0160583	0.014908	0.0145431	0.0137064	0.0139743			1643.03	0.0160583	0.0139743	0.0160398	0.0148466	0.0159067	0.0144828		1643.03	0.0160583	0.0139743	0.0161465	0.0164653	0.014611	0.0145558
1642.71	0.0162756	0.0151379	0.0147429	0.0138851	0.0141595			1642.71	0.0162756	0.0141595	0.0163235	0.0150994	0.0161749	0.0147011		1642.71	0.0162756	0.0141595	0.0163725	0.0166666	0.0148017	0.0147485
1642.39	0.0164859	0.0153641	0.014938	0.014059	0.0143389			1642.39	0.0164859	0.0143389	0.016603	0.0153451	0.016441	0.0149126		1642.39	0.0164859	0.0143389	0.0165907	0.0168598	0.0149861	0.0149342
1642.06	0.0166873	0.0155846	0.015127	0.014228	0.0145126			1642.06	0.0166873	0.0145126	0.0168753	0.0155826	0.0167027	0.0151175		1642.06	0.0166873	0.0145126	0.0167988	0.0170429	0.0151631	0.0151123
1641.74	0.016878	0.0157977	0.0153085	0.0143925	0.0146809			1641.74	0.016878	0.0146809	0.0171377	0.0158108	0.0169572	0.0153162		1641.74	0.016878	0.0146809	0.0169947	0.0172141	0.0153315	0.0152828
1641.42	0.0170564	0.0160014	0.0154817	0.0145526	0.0148443			1641.42	0.0170564	0.0148443	0.0173873	0.016029	0.017202	0.0155091		1641.42	0.0170564	0.0148443	0.0171764	0.0173716	0.0154905	0.0154456
1641.1	0.0172214	0.016194	0.0156456	0.014709	0.0150037			1641.1	0.0172214	0.0150037	0.0176214	0.016237	0.0174346	0.0156971		1641.1	0.0172214	0.0150037	0.0173422	0.0175139	0.0156395	0.015601
1640.78	0.0173718	0.0163739	0.0157995	0.014862	0.0151597			1640.78	0.0173718	0.0151597	0.0178373	0.0164346	0.0176523	0.015881		1640.78	0.0173718	0.0151597	0.0174902	0.0176395	0.0157781	0.0157494
1640.46	0.0175071	0.0165398	0.0159429	0.0150124	0.0153133			1640.46	0.0175071	0.0153133	0.0180328	0.0166222	0.0178534	0.0160617		1640.46	0.0175071	0.0153133	0.0176196	0.0177478	0.0159062	0.0158914
1640.14	0.0176266	0.0166905	0.0160756	0.0151606	0.0154651			1640.14	0.0176266	0.0154651	0.0182062	0.0168003	0.0180361	0.0162398		1640.14	0.0176266	0.0154651	0.0177289	0.0178379	0.016024	0.0160277
1639.81	0.0177302	0.0168255	0.0161976	0.0153073	0.0156159			1639.81	0.0177302	0.0156159	0.0183561	0.0169698	0.0181995	0.0164162		1639.81	0.0177302	0.0156159	0.0178181	0.0179096	0.0161321	0.016159
1639.49	0.0178183	0.0169445	0.0163093	0.0154529	0.0157662			1639.49	0.0178183	0.0157662	0.0184824	0.0171315	0.0183436	0.0165916		1639.49	0.0178183	0.0157662	0.0178871	0.0179633	0.0162316	0.0162861
1639.17	0.017892	0.0170484	0.0164117	0.015598	0.0159165			1639.17	0.017892	0.0159165	0.0185856	0.0172868	0.0184691	0.0167668		1639.17	0.017892	0.0159165	0.0179373	0.018	0.016324	0.0164101
1638.85	0.017953	0.0171382	0.0165059	0.015743	0.0160672			1638.85	0.017953	0.0160672	0.0186678	0.0174373	0.0185778	0.0169427		1638.85	0.017953	0.0160672	0.0179705	0.0180217	0.0164112	0.0165319
1638.53	0.0180037	0.017216	0.0165937	0.0158885	0.0162188			1638.53	0.0180037	0.0162188	0.0187315	0.0175845	0.0186723	0.0171199		1638.53	0.0180037	0.0162188	0.0179894	0.018031	0.0164951	0.0166528
1638.21	0.018047	0.0172843	0.0166771	0.0160349	0.0163718			1638.21	0.018047	0.0163718	0.0187807	0.0177307	0.0187557	0.0172997		1638.21	0.018047	0.0163718	0.0179974	0.0180316	0.0165783	0.0167742
1637.89	0.0180864	0.0173462	0.0167583	0.016183	0.0165266			1637.89	0.0180864	0.0165266	0.0188198	0.0178777	0.018832	0.0174829		1637.89	0.0180864	0.0165266	0.0179983	0.0180275	0.0166631	0.0168977
1637.56	0.0181257	0.0174049	0.0168397	0.0163333	0.0166839			1637.56	0.0181257	0.0166839	0.0188535	0.018028	0.0189049	0.0176705		1637.56	0.0181257	0.0166839	0.0179961	0.0180228	0.0167518	0.0170246
1637.24	0.0181685	0.0174638	0.0169237	0.0164867	0.0168446			1637.24	0.0181685	0.0168446	0.0188867	0.0181839	0.0189783	0.0178638		1637.24	0.0181685	0.0168446	0.0179951	0.0180215	0.0168468	0.0171566
1636.92	0.018218	0.0175261	0.0170125	0.016644	0.0170094			1636.92	0.018218	0.0170094	0.018924	0.0183473	0.019056	0.0180637		1636.92	0.018218	0.0170094	0.0179994	0.018027	0.01695	0.0172952
1636.6	0.0182772	0.0175949	0.0171086	0.0168066	0.0171797			1636.6	0.0182772	0.0171797	0.0189695	0.0185207	0.0191411	0.0182716		1636.6	0.0182772	0.0171797	0.0180127	0.0180422	0.0170633	0.0174419
1636.28	0.0183484	0.0176726	0.0172139	0.0169756	0.0173567			1636.28	0.0183484	0.0173567	0.019027	0.0187061	0.0192365	0.018489		1636.28	0.0183484	0.0173567	0.0180384	0.0180691	0.0171883	0.0175982
1635.96	0.0184334	0.0177614	0.0173303	0.0171523	0.0175417			1635.96	0.0184334	0.0175417	0.0190994	0.0189056	0.0193445	0.0187174		1635.96	0.0184334	0.0175417	0.0180793	0.0181095	0.0173264	0.0177655
1635.64	0.0185334	0.0178629	0.0174592	0.0173379	0.0177362			1635.64	0.0185334	0.0177362	0.0191893	0.0191211	0.019467	0.0189584		1635.64	0.0185334	0.0177362	0.0181376	0.0181648	0.0174787	0.0179451
1635.31	0.0186493	0.0179782	0.0176015	0.0175337	0.0179413			1635.31	0.0186493	0.0179413	0.0192987	0.0193542	0.0196053	0.0192133		1635.31	0.0186493	0.0179413	0.0182147	0.0182362	0.0176461	0.0181381
1634.99	0.0187815	0.018108	0.0177579	0.0177404	0.0181581			1634.99	0.0187815	0.0181581	0.0194287	0.019606	0.0197601	0.0194835		1634.99	0.0187815	0.0181581	0.0183115	0.0183245	0.017829	0.0183455
1634.67	0.0189303	0.0182528	0.0179287	0.017959	0.0183876			1634.67	0.0189303	0.0183876	0.0195804	0.0198773	0.0199321	0.0197703		1634.67	0.0189303	0.0183876	0.0184286	0.0184308	0.0180276	0.0185679
1634.35	0.0190958	0.0184129	0.018114	0.0181899	0.0186304			1634.35	0.0190958	0.0186304	0.019754	0.0201688	0.0201215	0.0200745		1634.35	0.0190958	0.0186304	0.0185661	0.0185551	0.018242	0.0188059
1634.03	0.0192777	0.0185884	0.0183138	0.0184338	0.0188871			1634.03	0.0192777	0.0188871	0.0199495	0.0204805	0.0203285	0.020397		1634.03	0.0192777	0.0188871	0.018724	0.0186978	0.0184716	0.0190598
1633.71	0.0194759	0.0187792	0.0185279	0.0186908	0.0191579			1633.71	0.0194759	0.0191579	0.0201668	0.0208127	0.0205531	0.0207386		1633.71	0.0194759	0.0191579	0.0189022	0.0188585	0.0187159	0.0193296
1633.39	0.0196896	0.018985	0.0187562	0.0189612	0.0194431			1633.39	0.0196896	0.0194431	0.0204053	0.0211653	0.020795	0.0210995		1633.39	0.0196896	0.0194431	0.0191004	0.0190367	0.0189739	0.0196151
1633.07	0.019918	0.0192055	0.0189979	0.0192443	0.0197421			1633.07	0.019918	0.0197421	0.0206641	0.0215376	0.0210535	0.0214797		1633.07	0.019918	0.0197421	0.0193182	0.0192315	0.0192445	0.0199155
1632.74	0.0201599	0.0194395	0.0192521	0.0195394	0.0200542			1632.74	0.0201599	0.0200542	0.0209421	0.0219287	0.0213277	0.0218781		1632.74	0.0201599	0.0200542	0.0195545	0.0194414	0.0195258	0.0202293
1632.42	0.0204137	0.0196856	0.0195171	0.0198448	0.0203778			1632.42	0.0204137	0.0203778	0.0212374	0.0223366	0.0216157	0.022293		1632.42	0.0204137	0.0203778	0.0198077	0.0196651	0.0198156	0.0205546
1632.1	0.0206773	0.0199417	0.0197907	0.0201581	0.0207109			1632.1	0.0206773	0.0207109	0.0215477	0.0227584	0.0219152	0.0227216		1632.1	0.0206773	0.0207109	0.0200758	0.0199002	0.0201112	0.0208886
1631.78	0.0209481	0.0202051	0.0200697	0.0204763	0.0210504			1631.78	0.0209481	0.0210504	0.0218697	0.02319	0.0222229	0.0231601		1631.78	0.0209481	0.0210504	0.0203558	0.020144	0.0204093	0.0212277
1631.46	0.0212229	0.0204724	0.0203509	0.0207956	0.0213927			1631.46	0.0212229	0.0213927	0.0221998	0.0236267	0.0225349	0.0236034		1631.46	0.0212229	0.0213927	0.0206442	0.0203932	0.020706	0.0215679
1631.14	0.021498	0.0207398	0.0206301	0.0211116	0.0217333			1631.14	0.021498	0.0217333	0.0225333	0.0240624	0.0228462	0.0240459		1631.14	0.021498	0.0217333	0.020937	0.0206442	0.0209972	0.0219044
1630.82	0.0217688	0.0210027	0.0209028	0.0214194	0.022067			1630.82	0.0217688	0.022067	0.0228645	0.0244903	0.0231513	0.0244806		1630.82	0.0217688	0.022067	0.0212293	0.0208923	0.0212779	0.0222319
1630.49	0.02203	0.0212562	0.0211641	0.0217138	0.0223882			1630.49	0.02203	0.0223882	0.0231877	0.0249033	0.0234441	0.0249004		1630.49	0.02203	0.0223882	0.021516	0.0211331	0.0215433	0.0225447
1630.17	0.0222761	0.0214953	0.0214092	0.0219893	0.0226907			1630.17	0.0222761	0.0226907	0.0234964	0.0252938	0.0237183	0.0252975		1630.17	0.0222761	0.0226907	0.0217914	0.0213618	0.0217882	0.0228369
1629.85	0.022501	0.0217145	0.0216329	0.0222406	0.0229684			1629.85	0.022501	0.0229684	0.0237838	0.0256541	0.0239673	0.0256642		1629.85	0.022501	0.0229684	0.0220495	0.0215729	0.0220075	0.0231026
1629.53	0.0226989	0.0219089	0.0218305	0.0224628	0.0232157			1629.53	0.0226989	0.0232157	0.0240437	0.025977	0.0241851	0.0259931		1629.53	0.0226989	0.0232157	0.0222849	0.021762	0.0221967	0.0233365
1629.21	0.0228647	0.0220741	0.0219977	0.0226515	0.0234276			1629.21	0.0228647	0.0234276	0.02427	0.0262559	0.0243663	0.0262778		1629.21	0.0228647	0.0234276	0.0224922	0.0219245	0.0223521	0.0235336
1628.89	0.022994	0.0222062	0.0221312	0.0228034	0.0236001			1628.89	0.022994	0.0236001	0.0244577	0.0264852	0.0245065	0.0265128		1628.89	0.022994	0.0236001	0.0226668	0.0220568	0.0224707	0.0236903
1628.57	0.0230835	0.0223024	0.0222284	0.0229159	0.0237304			1628.57	0.0230835	0.0237304	0.0246026	0.0266605	0.0246024	0.0266942		1628.57	0.0230835	0.0237304	0.0228051	0.0221556	0.0225507	0.023804
1628.24	0.0231312	0.0223612	0.0222878	0.0229879	0.0238169			1628.24	0.0231312	0.0238169	0.0247022	0.0267795	0.0246523	0.0268195		1628.24	0.0231312	0.0238169	0.0229044	0.0222188	0.0225914	0.0238732
1627.92	0.0231363	0.022382	0.0223094	0.0230193	0.0238597			1627.92	0.0231363	0.0238597	0.0247551	0.026841	0.0246557	0.0268883		1627.92	0.0231363	0.0238597	0.0229631	0.022245	0.0225934	0.023898
1627.6	0.0230995	0.0223657	0.022294	0.0230115	0.0238601			1627.6	0.0230995	0.0238601	0.0247614	0.0268461	0.0246138	0.0269016		1627.6	0.0230995	0.0238601	0.0229811	0.0222342	0.0225583	0.0238798
1627.28	0.023022	0.0223141	0.0222438	0.0229669	0.0238206			1627.28	0.023022	0.0238206	0.0247227	0.0267973	0.0245286	0.0268625		1627.28	0.023022	0.0238206	0.0229588	0.0221869	0.0224886	0.023821
1626.96	0.0229061	0.0222296	0.0221618	0.0228887	0.0237446			1626.96	0.0229061	0.0237446	0.0246413	0.0266987	0.0244034	0.0267751		1626.96	0.0229061	0.0237446	0.022898	0.0221044	0.0223875	0.0237251
1626.64	0.0227547	0.0221155	0.0220512	0.022781	0.0236363			1626.64	0.0227547	0.0236363	0.0245205	0.0265551	0.024242	0.0266446		1626.64	0.0227547	0.0236363	0.0228011	0.0219892	0.0222587	0.0235963
1626.32	0.0225709	0.0219751	0.0219158	0.022648	0.0235002			1626.32	0.0225709	0.0235002	0.0243637	0.026372	0.0240483	0.0264765		1626.32	0.0225709	0.0235002	0.022671	0.0218434	0.0221061	0.0234389
1625.99	0.022358	0.0218121	0.0217593	0.022494	0.0233407			1625.99	0.022358	0.0233407	0.0241745	0.0261551	0.0238266	0.0262767		1625.99	0.022358	0.0233407	0.0225107	0.0216701	0.0219334	0.0232577
1625.67	0.0221197	0.0216298	0.0215852	0.0223232	0.0231621			1625.67	0.0221197	0.0231621	0.0239564	0.0259097	0.0235808	0.0260507		1625.67	0.0221197	0.0231621	0.0223235	0.0214721	0.0217442	0.0230568
1625.35	0.0218594	0.0214314	0.0213969	0.0221392	0.0229684			1625.35	0.0218594	0.0229684	0.0237126	0.0256409	0.0233143	0.0258035		1625.35	0.0218594	0.0229684	0.0221122	0.0212525	0.0215418	0.0228401
1625.03	0.0215801	0.0212196	0.0211969	0.0219452	0.022763			1625.03	0.0215801	0.022763	0.0234461	0.0253526	0.0230301	0.0255393		1625.03	0.0215801	0.022763	0.0218795	0.0210134	0.0213289	0.022611
1624.71	0.0212849	0.0209969	0.0209877	0.0217437	0.0225486			1624.71	0.0212849	0.0225486	0.0231594	0.0250486	0.0227308	0.0252618		1624.71	0.0212849	0.0225486	0.0216275	0.0207574	0.0211077	0.0223719
1624.39	0.0209761	0.0207652	0.020771	0.0215366	0.0223272			1624.39	0.0209761	0.0223272	0.0228546	0.0247315	0.0224182	0.0249733		1624.39	0.0209761	0.0223272	0.021358	0.0204859	0.0208796	0.0221247
1624.07	0.020656	0.0205259	0.0205481	0.0213252	0.0221004			1624.07	0.020656	0.0221004	0.0225337	0.0244035	0.0220939	0.024676		1624.07	0.020656	0.0221004	0.0210728	0.0202006	0.0206458	0.0218707
1623.74	0.0203267	0.0202802	0.02032	0.0211103	0.0218691			1623.74	0.0203267	0.0218691	0.0221985	0.0240663	0.0217589	0.0243708		1623.74	0.0203267	0.0218691	0.0207734	0.0199032	0.0204069	0.0216109
1623.42	0.0199901	0.0200291	0.0200875	0.0208922	0.0216337			1623.42	0.0199901	0.0216337	0.0218507	0.0237208	0.0214143	0.0240586		1623.42	0.0199901	0.0216337	0.0204618	0.0195954	0.0201633	0.0213459
1623.1	0.0196483	0.0197734	0.0198508	0.0206711	0.0213947			1623.1	0.0196483	0.0213947	0.0214917	0.0233679	0.0210608	0.0237393		1623.1	0.0196483	0.0213947	0.0201396	0.0192786	0.0199151	0.021076
1622.78	0.019303	0.0195136	0.0196105	0.0204468	0.0211517			1622.78	0.019303	0.0211517	0.021123	0.0230079	0.0206992	0.0234129		1622.78	0.019303	0.0211517	0.0198086	0.0189547	0.0196623	0.0208014
1622.46	0.0189559	0.0192503	0.0193664	0.0202189	0.0209044			1622.46	0.0189559	0.0209044	0.020746	0.0226406	0.0203301	0.0230787		1622.46	0.0189559	0.0209044	0.0194701	0.0186256	0.0194046	0.020522
1622.14	0.0186081	0.0189837	0.0191184	0.0199871	0.0206521			1622.14	0.0186081	0.0206521	0.0203616	0.0222659	0.019954	0.0227361		1622.14	0.0186081	0.0206521	0.0191255	0.0182926	0.0191417	0.0202372
1621.82	0.0182603	0.0187139	0.0188662	0.0197506	0.0203939			1621.82	0.0182603	0.0203939	0.0199707	0.0218833	0.0195711	0.022384		1621.82	0.0182603	0.0203939	0.0187757	0.0179569	0.0188733	0.0199466
1621.49	0.0179129	0.0184409	0.0186095	0.0195088	0.020129			1621.49	0.0179129	0.020129	0.0195741	0.0214922	0.0191818	0.0220214		1621.49	0.0179129	0.020129	0.0184215	0.0176194	0.0185991	0.0196497
1621.17	0.017566	0.0181645	0.018348	0.019261	0.0198565			1621.17	0.017566	0.0198565	0.0191728	0.0210924	0.0187866	0.0216475		1621.17	0.017566	0.0198565	0.0180638	0.017281	0.0183189	0.0193459
1620.85	0.0172198	0.0178848	0.0180815	0.0190065	0.0195758			1620.85	0.0172198	0.0195758	0.0187674	0.0206838	0.018386	0.0212614		1620.85	0.0172198	0.0195758	0.0177037	0.0169424	0.0180326	0.019035
1620.53	0.0168742	0.0176018	0.0178101	0.018745	0.0192864			1620.53	0.0168742	0.0192864	0.0183588	0.0202664	0.0179806	0.020863		1620.53	0.0168742	0.0192864	0.0173422	0.0166039	0.0177405	0.018717
1620.21	0.0165297	0.0173155	0.0175338	0.018476	0.0189881			1620.21	0.0165297	0.0189881	0.0179479	0.0198406	0.0175712	0.0204518		1620.21	0.0165297	0.0189881	0.0169803	0.016266	0.0174429	0.018392
1619.89	0.0161866	0.0170261	0.0172529	0.0181994	0.0186809			1619.89	0.0161866	0.0186809	0.0175353	0.0194067	0.0171588	0.0200281		1619.89	0.0161866	0.0186809	0.016619	0.0159291	0.0171404	0.0180603
1619.57	0.0158455	0.0167338	0.0169677	0.0179153	0.0183648			1619.57	0.0158455	0.0183648	0.0171217	0.0189654	0.0167442	0.0195923		1619.57	0.0158455	0.0183648	0.0162589	0.0155937	0.0168335	0.0177221
1619.24	0.0155068	0.0164387	0.0166786	0.0176238	0.0180402			1619.24	0.0155068	0.0180402	0.0167076	0.0185172	0.0163283	0.0191451		1619.24	0.0155068	0.0180402	0.0159004	0.0152602	0.0165229	0.0173779
1618.92	0.0151709	0.016141	0.0163859	0.0173252	0.0177075			1618.92	0.0151709	0.0177075	0.0162933	0.0180625	0.0159118	0.0186872		1618.92	0.0151709	0.0177075	0.0155437	0.0149289	0.0162092	0.017028
1618.6	0.0148379	0.015841	0.0160898	0.0170198	0.0173671			1618.6	0.0148379	0.0173671	0.015879	0.017602	0.0154953	0.0182198		1618.6	0.0148379	0.0173671	0.0151885	0.0146	0.015893	0.0166728
1618.28	0.0145078	0.0155386	0.0157908	0.0167081	0.0170195			1618.28	0.0145078	0.0170195	0.0154647	0.0171363	0.0150793	0.017744		1618.28	0.0145078	0.0170195	0.0148349	0.0142737	0.015575	0.0163128
1617.96	0.0141804	0.015234	0.0154892	0.0163908	0.0166655			1617.96	0.0141804	0.0166655	0.0150506	0.0166664	0.0146641	0.0172609		1617.96	0.0141804	0.0166655	0.0144827	0.0139505	0.0152558	0.0159489
1617.64	0.0138554	0.0149274	0.0151854	0.0160684	0.0163059			1617.64	0.0138554	0.0163059	0.0146365	0.0161934	0.0142502	0.0167721		1617.64	0.0138554	0.0163059	0.0141321	0.0136301	0.0149361	0.0155821
1617.32	0.0135329	0.014619	0.0148801	0.015742	0.0159421			1617.32	0.0135329	0.0159421	0.0142229	0.0157187	0.013838	0.0162791		1617.32	0.0135329	0.0159421	0.0137834	0.0133125	0.0146167	0.0152134
1616.99	0.0132129	0.0143095	0.014574	0.0154127	0.0155753			1616.99	0.0132129	0.0155753	0.0138102	0.015244	0.0134282	0.0157839		1616.99	0.0132129	0.0155753	0.0134372	0.0129978	0.0142982	0.0148445
1616.67	0.0128958	0.0139995	0.014268	0.0150819	0.0152074			1616.67	0.0128958	0.0152074	0.0133994	0.0147714	0.0130217	0.0152886		1616.67	0.0128958	0.0152074	0.0130942	0.012686	0.0139816	0.0144768
1616.35	0.0125822	0.0136901	0.013963	0.0147511	0.0148401			1616.35	0.0125822	0.0148401	0.0129915	0.0143023	0.0126196	0.0147956		1616.35	0.0125822	0.0148401	0.0127553	0.0123771	0.0136678	0.0141119
1616.03	0.0122725	0.013382	0.0136597	0.0144216	0.0144748			1616.03	0.0122725	0.0144748	0.0125875	0.0138385	0.0122228	0.014307		1616.03	0.0122725	0.0144748	0.0124211	0.0120711	0.0133575	0.0137508
1615.71	0.0119672	0.0130763	0.0133589	0.0140947	0.0141131			1615.71	0.0119672	0.0141131	0.0121887	0.0133808	0.0118322	0.0138246		1615.71	0.0119672	0.0141131	0.0120921	0.0117683	0.0130515	0.0133946
1615.39	0.0116667	0.0127736	0.0130612	0.0137712	0.0137558			1615.39	0.0116667	0.0137558	0.0117957	0.01293	0.0114487	0.01335		1615.39	0.0116667	0.0137558	0.0117687	0.0114686	0.0127501	0.0130436
1615.07	0.0113714	0.0124747	0.0127672	0.0134518	0.0134038			1615.07	0.0113714	0.0134038	0.0114096	0.0124868	0.0110728	0.0128842		1615.07	0.0113714	0.0134038	0.0114512	0.0111728	0.0124539	0.0126984
1614.74	0.0110814	0.0121801	0.0124774	0.0131373	0.0130576			1614.74	0.0110814	0.0130576	0.011031	0.0120517	0.010705	0.0124283		1614.74	0.0110814	0.0130576	0.0111394	0.0108812	0.0121632	0.0123592
1614.42	0.0107973	0.0118904	0.0121924	0.0128284	0.0127179			1614.42	0.0107973	0.0127179	0.0106611	0.0116258	0.0103463	0.0119833		1614.42	0.0107973	0.0127179	0.010834	0.0105946	0.0118783	0.0120264
1614.1	0.0105199	0.0116063	0.0119131	0.0125258	0.0123856			1614.1	0.0105199	0.0123856	0.010301	0.01121	0.00999724	0.0115502		1614.1	0.0105199	0.0123856	0.0105352	0.0103142	0.0115999	0.0117008
1613.78	0.0102498	0.0113285	0.01164	0.0122305	0.0120615			1613.78	0.0102498	0.0120615	0.00995169	0.0108059	0.00965896	0.01113		1613.78	0.0102498	0.0120615	0.0102436	0.0100407	0.0113283	0.0113831
1613.46	0.00998798	0.0110577	0.0113741	0.0119433	0.0117464			1613.46	0.00998798	0.0117464	0.00961439	0.0104149	0.00933232	0.010724		1613.46	0.00998798	0.0117464	0.00995993	0.00977509	0.0110642	0.0110742
1613.14	0.00973498	0.0107948	0.0111159	0.011665	0.0114411			1613.14	0.00973498	0.0114411	0.00928995	0.010038	0.00901807	0.0103329		1613.14	0.00973498	0.0114411	0.00968497	0.00951806	0.0108079	0.0107749
1612.82	0.00949116	0.0105403	0.0108659	0.0113961	0.011146			1612.82	0.00949116	0.011146	0.00897903	0.00967604	0.00871681	0.00995717		1612.82	0.00949116	0.011146	0.00941923	0.00926979	0.0105598	0.0104857
1612.5	0.00925685	0.0102946	0.0106244	0.011137	0.0108616			1612.5	0.00925685	0.0108616	0.00868188	0.00932936	0.00842887	0.00959733		1612.5	0.00925685	0.0108616	0.00916313	0.00903027	0.0103201	0.0102071
1612.17	0.00903199	0.0100582	0.0103917	0.0108878	0.0105881			1612.17	0.00903199	0.0105881	0.00839864	0.00899818	0.00815442	0.00925349		1612.17	0.00903199	0.0105881	0.00891708	0.00879946	0.0100892	0.0099391
1611.85	0.00881646	0.00983128	0.0101679	0.0106487	0.0103256			1611.85	0.00881646	0.0103256	0.00812917	0.00868243	0.00789345	0.00892568		1611.85	0.00881646	0.0103256	0.00868105	0.00857691	0.00986725	0.00968176
1611.53	0.0086102	0.009614	0.00995331	0.0104196	0.0100742			1611.53	0.0086102	0.0100742	0.00787332	0.00838216	0.00764594	0.0086139		1611.53	0.0086102	0.0100742	0.00845514	0.00836237	0.00965448	0.00943504
1611.21	0.00841303	0.00940643	0.00974792	0.0102005	0.00983389			1611.21	0.00841303	0.00983389	0.00763086	0.00809726	0.00741174	0.00831809		1611.21	0.00841303	0.00983389	0.00823939	0.00815557	0.00945108	0.00919888
1610.89	0.00822475	0.00920862	0.00955174	0.00999131	0.00960473			1610.89	0.00822475	0.00960473	0.00740159	0.00782764	0.00719072	0.00803813		1610.89	0.00822475	0.00960473	0.00803367	0.00795666	0.00925717	0.00897321
1610.57	0.00804533	0.00902058	0.00936478	0.0097919	0.00938665			1610.57	0.00804533	0.00938665	0.00718531	0.00757315	0.00698272	0.00777381		1610.57	0.00804533	0.00938665	0.0078382	0.0077658	0.00907284	0.00875798
1610.25	0.0078746	0.0088422	0.00918701	0.00960216	0.00917949			1610.25	0.0078746	0.00917949	0.00698189	0.00733357	0.0067876	0.0075248		1610.25	0.0078746	0.00917949	0.00765299	0.00758322	0.00889801	0.00855315
1609.92	0.00771243	0.00867341	0.00901827	0.00942195	0.00898302			1609.92	0.00771243	0.00898302	0.00679125	0.00710851	0.00660511	0.00729065		1609.92	0.00771243	0.00898302	0.00747824	0.00740937	0.00873253	0.00835866
1609.6	0.00755896	0.00851413	0.00885852	0.00925114	0.00879701			1609.6	0.00755896	0.00879701	0.00661333	0.00689757	0.00643506	0.0070709		1609.6	0.00755896	0.00879701	0.0073141	0.00724471	0.00857625	0.00817447
1609.28	0.00741405	0.00836409	0.00870752	0.00908948	0.00862102			1609.28	0.00741405	0.00862102	0.00644789	0.0067001	0.00627693	0.00686478		1609.28	0.00741405	0.00862102	0.00716032	0.00708917	0.0084288	0.00800022
1608.96	0.00727769	0.00822308	0.00856512	0.00893672	0.00845471			1608.96	0.00727769	0.00845471	0.00629471	0.00651552	0.0061303	0.00667164		1608.96	0.00727769	0.00845471	0.00701673	0.00694279	0.00828992	0.00783575
1608.64	0.00714986	0.00809075	0.00843106	0.00879243	0.00829755			1608.64	0.00714986	0.00829755	0.00615332	0.00634311	0.00599452	0.00649068		1608.64	0.00714986	0.00829755	0.00688279	0.00680535	0.00815924	0.00768052
1608.32	0.00703016	0.00796675	0.00830494	0.00865615	0.00814896			1608.32	0.00703016	0.00814896	0.00602314	0.00618207	0.00586893	0.00632102		1608.32	0.00703016	0.00814896	0.00675791	0.00667661	0.00803631	0.00753404
1608	0.00691838	0.00785061	0.00818643	0.00852731	0.00800849			1608	0.00691838	0.00800849	0.0059035	0.00603171	0.00575289	0.00616189		1608	0.00691838	0.00800849	0.00664142	0.00655601	0.00792082	0.0073958
1607.67	0.00681405	0.00774194	0.00807506	0.00840529	0.00787552			1607.67	0.00681405	0.00787552	0.00579364	0.00589117	0.00564572	0.00601236		1607.67	0.00681405	0.00787552	0.00653278	0.00644333	0.00781234	0.00726526
1607.35	0.00671667	0.0076403	0.00797035	0.00828946	0.00774945			1607.35	0.00671667	0.00774945	0.00569277	0.00575969	0.00554682	0.00587151		1607.35	0.00671667	0.00774945	0.00643148	0.00633787	0.00771051	0.00714194
1607.03	0.00662593	0.0075452	0.00787182	0.00817917	0.00762974			1607.03	0.00662593	0.00762974	0.00560009	0.00563642	0.00545557	0.0057384		1607.03	0.00662593	0.00762974	0.00633718	0.0062395	0.00761496	0.00702538
1606.71	0.00654127	0.00745619	0.00777893	0.00807378	0.00751569			1606.71	0.00654127	0.00751569	0.0055148	0.00552036	0.00537121	0.005612		1606.71	0.00654127	0.00751569	0.00624947	0.00614764	0.00752519	0.00691493
1606.39	0.00646215	0.00737259	0.00769096	0.00797261	0.0074065			1606.39	0.00646215	0.0074065	0.00543591	0.00541036	0.00529281	0.00549116		1606.39	0.00646215	0.0074065	0.00616779	0.00606138	0.00744057	0.00680988
1606.07	0.00638787	0.00729375	0.00760719	0.007875	0.00730135			1606.07	0.00638787	0.00730135	0.00536252	0.00530523	0.00521937	0.00537476		1606.07	0.00638787	0.00730135	0.00609154	0.00597987	0.0073604	0.0067094
1605.75	0.00631768	0.00721887	0.00752688	0.00778026	0.00719933			1605.75	0.00631768	0.00719933	0.00529359	0.00520385	0.00514973	0.0052617		1605.75	0.00631768	0.00719933	0.00601991	0.00590218	0.00728379	0.0066125
1605.42	0.00625058	0.00714705	0.00744921	0.00768776	0.00709958			1605.42	0.00625058	0.00709958	0.00522813	0.00510481	0.00508268	0.00515092		1605.42	0.00625058	0.00709958	0.00595196	0.00582734	0.0072098	0.00651804
1605.1	0.00618567	0.00707736	0.0073734	0.00759681	0.0070013			1605.1	0.00618567	0.0070013	0.00516501	0.00500714	0.005017	0.00504142		1605.1	0.00618567	0.0070013	0.00588668	0.00575428	0.00713734	0.0064249
1604.78	0.00612188	0.00700883	0.00729866	0.00750678	0.00690369			1604.78	0.00612188	0.00690369	0.00510322	0.00490981	0.00495155	0.00493234		1604.78	0.00612188	0.00690369	0.00582288	0.00568224	0.00706544	0.00633207
1604.46	0.00605825	0.0069405	0.00722428	0.00741711	0.00680619			1604.46	0.00605825	0.00680619	0.00504163	0.00481192	0.00488529	0.00482284		1604.46	0.00605825	0.00680619	0.00575957	0.00561036	0.00699307	0.00623855
1604.14	0.00599391	0.00687152	0.00714958	0.00732731	0.00670835			1604.14	0.00599391	0.00670835	0.00497917	0.00471286	0.00481729	0.00471232		1604.14	0.00599391	0.00670835	0.00569583	0.00553813	0.00691948	0.00614365
1603.82	0.00592825	0.00680122	0.00707398	0.00723699	0.00660994			1603.82	0.00592825	0.00660994	0.00491496	0.00461214	0.00474682	0.00460032		1603.82	0.00592825	0.00660994	0.00563104	0.00546521	0.00684399	0.00604695
1603.5	0.00586073	0.00672892	0.00699685	0.00714587	0.00651077			1603.5	0.00586073	0.00651077	0.00484819	0.00450935	0.00467326	0.00448642		1603.5	0.00586073	0.00651077	0.0055645	0.00539112	0.00676617	0.00594815
1603.17	0.00579099	0.00665421	0.00691778	0.00705378	0.00641079			1603.17	0.00579099	0.00641079	0.00477829	0.00440439	0.00459616	0.00437064		1603.17	0.00579099	0.00641079	0.0054959	0.00531557	0.0066858	0.00584728
1602.85	0.00571895	0.00657676	0.00683639	0.00696071	0.00631007			1602.85	0.00571895	0.00631007	0.00470485	0.00429712	0.00451521	0.00425297		1602.85	0.00571895	0.00631007	0.00542504	0.00523845	0.00660282	0.00574445
1602.53	0.00564449	0.00649633	0.00675245	0.00686666	0.0062085			1602.53	0.00564449	0.0062085	0.00462761	0.0041876	0.0044302	0.0041337		1602.53	0.00564449	0.0062085	0.00535167	0.00515924	0.00651724	0.00563976
1602.21	0.00556773	0.00641282	0.0066659	0.00677177	0.00610619			1602.21	0.00556773	0.00610619	0.00454655	0.00407601	0.00434115	0.00401317		1602.21	0.00556773	0.00610619	0.00527567	0.00507773	0.00642917	0.00553354
1601.89	0.00548863	0.00632624	0.00657678	0.0066762	0.00600304			1601.89	0.00548863	0.00600304	0.00446169	0.00396257	0.0042481	0.00389183		1601.89	0.00548863	0.00600304	0.00519677	0.00499361	0.00633864	0.00542586
1601.57	0.00540731	0.00623668	0.00648535	0.00658017	0.00589918			1601.57	0.00540731	0.00589918	0.00437309	0.00384774	0.00415136	0.00377023		1601.57	0.00540731	0.00589918	0.00511484	0.00490668	0.00624591	0.00531701
1601.25	0.00532363	0.00614437	0.00639189	0.00648396	0.0057948			1601.25	0.00532363	0.0057948	0.00428095	0.00373187	0.00405133	0.00364881		1601.25	0.00532363	0.0057948	0.00502967	0.00481683	0.00615101	0.0052072
1600.92	0.00523753	0.00604966	0.00629677	0.00638783	0.0056901			1600.92	0.00523753	0.0056901	0.00418551	0.00361543	0.00394851	0.00352805		1600.92	0.00523753	0.0056901	0.00494112	0.00472406	0.00605421	0.00509673
1600.6	0.00514902	0.00595299	0.00620044	0.00629213	0.00558552			1600.6	0.00514902	0.00558552	0.00408707	0.00349897	0.00384354	0.00340835		1600.6	0.00514902	0.00558552	0.00484927	0.00462876	0.00595586	0.00498584
1600.28	0.00505815	0.00585491	0.00610334	0.00619718	0.00548154			1600.28	0.00505815	0.00548154	0.00398603	0.00338297	0.0037371	0.00329011		1600.28	0.00505815	0.00548154	0.00475436	0.00453134	0.00585638	0.00487507
1599.96	0.0049652	0.00575588	0.00600579	0.0061033	0.00537867			1599.96	0.0049652	0.00537867	0.00388297	0.00326797	0.00362988	0.00317367		1599.96	0.0049652	0.00537867	0.00465694	0.00443248	0.00575633	0.00476476
1599.64	0.00487065	0.00565642	0.00590817	0.00601074	0.0052773			1599.64	0.00487065	0.0052773	0.0037784	0.00315434	0.00352256	0.00305933		1599.64	0.00487065	0.0052773	0.00455759	0.00433265	0.00565627	0.0046554
1599.32	0.00477515	0.00555698	0.0058109	0.00591976	0.00517784			1599.32	0.00477515	0.00517784	0.00367305	0.00304252	0.00341582	0.00294745		1599.32	0.00477515	0.00517784	0.00445714	0.00423258	0.00555687	0.00454735
1599	0.00467943	0.00545791	0.0057143	0.00583059	0.00508055			1599	0.00467943	0.00508055	0.00356761	0.00293278	0.00331028	0.00283832		1599	0.00467943	0.00508055	0.00435634	0.00413271	0.00545863	0.00444098
1598.67	0.00458411	0.00535962	0.00561878	0.00574337	0.00498569			1598.67	0.00458411	0.00498569	0.0034628	0.00282553	0.00320657	0.00273226		1598.67	0.00458411	0.00498569	0.00425597	0.00403351	0.00536203	0.00433669
1598.35	0.00448972	0.00526234	0.00552463	0.00565817	0.00489333			1598.35	0.00448972	0.00489333	0.00335927	0.00272072	0.00310513	0.00262947		1598.35	0.00448972	0.00489333	0.00415659	0.00393487	0.00526732	0.00423454
1598.03	0.00439672	0.00516637	0.00543232	0.0055751	0.00480355			1598.03	0.00439672	0.00480355	0.00325764	0.00261867	0.00300642	0.00253011		1598.03	0.00439672	0.00480355	0.00405858	0.00383706	0.00517475	0.00413476
1597.71	0.00430526	0.00507196	0.00534194	0.00549414	0.00471626			1597.71	0.00430526	0.00471626	0.00315841	0.00251941	0.00291067	0.00243424		1597.71	0.00430526	0.00471626	0.00396209	0.00373973	0.00508437	0.00403739
1597.39	0.00421552	0.00497935	0.00525376	0.00541532	0.00463139			1597.39	0.00421552	0.00463139	0.00306196	0.00242289	0.00281807	0.00234183		1597.39	0.00421552	0.00463139	0.00386733	0.00364292	0.0049962	0.00394236
1597.07	0.00412773	0.00488886	0.00516789	0.00533866	0.00454893			1597.07	0.00412773	0.00454893	0.00296872	0.00232937	0.00272881	0.00225291		1597.07	0.00412773	0.00454893	0.00377447	0.00354686	0.00491033	0.00384975
1596.75	0.00404217	0.00480075	0.00508436	0.00526417	0.00446882			1596.75	0.00404217	0.00446882	0.00287894	0.00223899	0.00264297	0.00216745		1596.75	0.00404217	0.00446882	0.00368365	0.00345182	0.00482688	0.00375962
1596.42	0.00395922	0.00471532	0.0050033	0.00519195	0.00439119			1596.42	0.00395922	0.00439119	0.00279295	0.00215188	0.00256068	0.00208549		1596.42	0.00395922	0.00439119	0.00359534	0.00335839	0.00474589	0.00367206
1596.1	0.00387921	0.00463277	0.00492478	0.00512204	0.004316			1596.1	0.00387921	0.004316	0.00271087	0.00206832	0.00248199	0.00200713		1596.1	0.00387921	0.004316	0.00350981	0.00326734	0.00466751	0.00358727
1595.78	0.00380245	0.00455325	0.00484886	0.00505447	0.00424342			1595.78	0.00380245	0.00424342	0.00263291	0.00198842	0.00240705	0.00193237		1595.78	0.00380245	0.00424342	0.00342761	0.00317921	0.00459178	0.0035054
1595.46	0.00372909	0.00447684	0.00477563	0.00498925	0.00417339			1595.46	0.00372909	0.00417339	0.00255899	0.00191226	0.00233578	0.00186122		1595.46	0.00372909	0.00417339	0.00334897	0.00309465	0.00451864	0.00342661
1595.14	0.00365891	0.00440348	0.00470504	0.00492627	0.00410584			1595.14	0.00365891	0.00410584	0.002489	0.0018396	0.00226813	0.00179356		1595.14	0.00365891	0.00410584	0.00327388	0.00301354	0.00444802	0.00335084
1594.82	0.00359187	0.00433305	0.00463717	0.00486546	0.0040407			1594.82	0.00359187	0.0040407	0.00242275	0.00177041	0.00220403	0.00172923		1594.82	0.00359187	0.0040407	0.00320247	0.00293591	0.00437988	0.00327809
1594.5	0.00352778	0.00426551	0.00457186	0.00480672	0.00397782			1594.5	0.00352778	0.00397782	0.00236001	0.00170437	0.00214331	0.00166814		1594.5	0.00352778	0.00397782	0.00313454	0.00286128	0.00431411	0.00320824
1594.17	0.00346629	0.00420066	0.00450896	0.00474991	0.00391701			1594.17	0.00346629	0.00391701	0.00230049	0.00164121	0.00208581	0.00160996		1594.17	0.00346629	0.00391701	0.00306963	0.00278924	0.00425064	0.00314117
1593.85	0.0034074	0.00413842	0.00444834	0.00469497	0.00385832			1593.85	0.0034074	0.00385832	0.00224394	0.0015808	0.00203134	0.00155452		1593.85	0.0034074	0.00385832	0.0030075	0.00271947	0.00418951	0.00307664
1593.53	0.003351	0.00407862	0.00438977	0.00464183	0.00380164			1593.53	0.003351	0.00380164	0.00219014	0.0015229	0.00197969	0.0015016		1593.53	0.003351	0.00380164	0.00294771	0.00265173	0.0041306	0.00301445
1593.21	0.00329709	0.00402116	0.00433318	0.00459049	0.00374703			1593.21	0.00329709	0.00374703	0.00213892	0.0014675	0.00193068	0.00145098		1593.21	0.00329709	0.00374703	0.00289007	0.00258617	0.00407385	0.00295457
1592.89	0.00324576	0.00396595	0.00427856	0.00454095	0.00369465			1592.89	0.00324576	0.00369465	0.00209028	0.00141473	0.00188421	0.0014026		1592.89	0.00324576	0.00369465	0.00283467	0.00252322	0.00401925	0.00289692
1592.57	0.00319707	0.00391293	0.00422598	0.00449324	0.0036445			1592.57	0.00319707	0.0036445	0.00204416	0.00136473	0.00184013	0.00135639		1592.57	0.00319707	0.0036445	0.0027814	0.00246293	0.00396664	0.00284145
1592.25	0.00315099	0.00386206	0.00417556	0.00444741	0.00359668			1592.25	0.00315099	0.00359668	0.00200067	0.00131773	0.00179838	0.00131243		1592.25	0.00315099	0.00359668	0.00273055	0.00240586	0.00391597	0.00278823
1591.93	0.0031075	0.00381331	0.00412732	0.00440346	0.00355109			1591.93	0.0031075	0.00355109	0.00195975	0.00127378	0.00175886	0.00127069		1591.93	0.0031075	0.00355109	0.00268204	0.00235202	0.00386713	0.00273721
1591.6	0.00306633	0.00376659	0.00408121	0.0043613	0.00350754			1591.6	0.00306633	0.00350754	0.00192131	0.00123268	0.00172143	0.00123122		1591.6	0.00306633	0.00350754	0.00263582	0.00230094	0.00382003	0.00268831
1591.28	0.00302736	0.00372188	0.00403713	0.00432087	0.00346579			1591.28	0.00302736	0.00346579	0.00188521	0.0011942	0.00168593	0.00119397		1591.28	0.00302736	0.00346579	0.00259167	0.00225242	0.00377459	0.00264134
1590.96	0.0029903	0.00367903	0.00399482	0.00428198	0.00342553			1590.96	0.0029903	0.00342553	0.00185115	0.00115781	0.00165221	0.00115887		1590.96	0.0029903	0.00342553	0.00254923	0.00220566	0.0037307	0.00259622
1590.64	0.00295501	0.00363793	0.0039541	0.0042445	0.00338653			1590.64	0.00295501	0.00338653	0.0018189	0.00112309	0.00162007	0.00112575		1590.64	0.00295501	0.00338653	0.0025082	0.00216028	0.0036883	0.00255277
1590.32	0.00292118	0.00359838	0.00391467	0.00420822	0.00334854			1590.32	0.00292118	0.00334854	0.00178814	0.0010894	0.0015893	0.00109447		1590.32	0.00292118	0.00334854	0.00246825	0.00211578	0.00364733	0.00251079
1590	0.00288895	0.00356033	0.00387646	0.00417305	0.00331157			1590	0.00288895	0.00331157	0.0017588	0.00105651	0.00155989	0.00106492		1590	0.00288895	0.00331157	0.00242946	0.00207226	0.00360778	0.00247033
1589.68	0.00285832	0.00352366	0.00383939	0.00413892	0.00327565			1589.68	0.00285832	0.00327565	0.00173074	0.00102439	0.00153178	0.00103709		1589.68	0.00285832	0.00327565	0.00239176	0.00203001	0.0035697	0.00243141
1589.35	0.0028294	0.00348834	0.00380343	0.00410581	0.00324092			1589.35	0.0028294	0.00324092	0.00170405	0.0009931	0.00150498	0.00101082		1589.35	0.0028294	0.00324092	0.00235548	0.00198943	0.0035331	0.00239398
1589.03	0.00280236	0.00345431	0.00376862	0.00407373	0.00320746			1589.03	0.00280236	0.00320746	0.00167871	0.000962922	0.00147946	0.000986014		1589.03	0.00280236	0.00320746	0.00232059	0.00195108	0.00349794	0.00235803
1588.71	0.00277712	0.00342151	0.00373491	0.00404265	0.00317539			1588.71	0.00277712	0.00317539	0.00165469	0.000934071	0.00145517	0.000962466		1588.71	0.00277712	0.00317539	0.00228722	0.00191491	0.00346413	0.00232338
1588.39	0.00275355	0.0033899	0.00370222	0.00401257	0.00314458			1588.39	0.00275355	0.00314458	0.00163183	0.000906543	0.00143196	0.000939873		1588.39	0.00275355	0.00314458	0.00225503	0.00188101	0.00343149	0.00228987
1588.07	0.00273157	0.00335935	0.0036705	0.00398347	0.00311505			1588.07	0.00273157	0.00311505	0.00161002	0.000880482	0.00140972	0.000918111		1588.07	0.00273157	0.00311505	0.00222402	0.00184908	0.0033999	0.00225722
1587.75	0.00271076	0.0033298	0.00363966	0.00395527	0.00308653			1587.75	0.00271076	0.00308653	0.00158899	0.000855636	0.00138827	0.000896929		1587.75	0.00271076	0.00308653	0.00219387	0.00181862	0.00336911	0.00222528
1587.43	0.00269087	0.0033011	0.00360961	0.00392788	0.00305887			1587.43	0.00269087	0.00305887	0.0015686	0.00083171	0.00136754	0.000876301		1587.43	0.00269087	0.00305887	0.00216439	0.0017889	0.00333901	0.00219392
1587.1	0.00267161	0.00327316	0.00358024	0.00390123	0.00303176			1587.1	0.00267161	0.00303176	0.00154869	0.000808335	0.00134736	0.000856238		1587.1	0.00267161	0.00303176	0.0021355	0.00175949	0.00330945	0.00216301
1586.78	0.00265279	0.00324585	0.00355152	0.00387518	0.00300499			1586.78	0.00265279	0.00300499	0.00152914	0.00078529	0.00132773	0.0008368		1586.78	0.00265279	0.00300499	0.00210708	0.00173002	0.00328039	0.00213261
1586.46	0.00263439	0.00321907	0.00352344	0.00384961	0.00297844			1586.46	0.00263439	0.00297844	0.00150999	0.000762323	0.0013086	0.000818086		1586.46	0.00263439	0.00297844	0.00207941	0.00170034	0.00325175	0.00210277
1586.14	0.00261636	0.0031927	0.00349587	0.00382438	0.00295192			1586.14	0.00261636	0.00295192	0.00149124	0.000739397	0.00128982	0.000800053		1586.14	0.00261636	0.00295192	0.00205235	0.00167048	0.00322346	0.00207338
1585.82	0.00259864	0.00316661	0.00346871	0.00379939	0.00292534			1585.82	0.00259864	0.00292534	0.00147287	0.000716437	0.00127127	0.000782631		1585.82	0.00259864	0.00292534	0.00202579	0.00164022	0.00319538	0.00204448
1585.5	0.00258123	0.00314072	0.00344185	0.00377452	0.00289865			1585.5	0.00258123	0.00289865	0.00145493	0.000693515	0.00125284	0.000765607		1585.5	0.00258123	0.00289865	0.00199968	0.00160975	0.00316743	0.00201587
1585.18	0.00256412	0.00311497	0.0034151	0.00374971	0.00287181			1585.18	0.00256412	0.00287181	0.00143739	0.000670702	0.00123429	0.000748808		1585.18	0.00256412	0.00287181	0.00197359	0.0015788	0.00313935	0.00198742
1584.85	0.00254713	0.00308927	0.00338835	0.00372494	0.00284499			1584.85	0.00254713	0.00284499	0.00142021	0.000648024	0.00121555	0.000732107		1584.85	0.00254713	0.00284499	0.00194736	0.00154725	0.00311107	0.00195891
1584.53	0.00253042	0.00306367	0.0033616	0.00370025	0.00281829			1584.53	0.00253042	0.00281829	0.00140339	0.000625713	0.00119664	0.000715429		1584.53	0.00253042	0.00281829	0.00192072	0.00151535	0.00308257	0.00193038
1584.21	0.00251399	0.00303817	0.00333482	0.00367569	0.00279178			1584.21	0.00251399	0.00279178	0.00138682	0.000603862	0.00117758	0.000698824		1584.21	0.00251399	0.00279178	0.0018937	0.00148294	0.00305381	0.00190172
1583.89	0.00249783	0.00301284	0.00330807	0.00365133	0.00276562			1583.89	0.00249783	0.00276562	0.00137038	0.000582552	0.0011585	0.000682403		1583.89	0.00249783	0.00276562	0.00186619	0.0014504	0.0030249	0.00187298
1583.57	0.00248227	0.00298778	0.00328151	0.00362732	0.00273993			1583.57	0.00248227	0.00273993	0.00135413	0.000561941	0.00113959	0.000666275		1583.57	0.00248227	0.00273993	0.00183845	0.00141815	0.00299609	0.0018443
1583.25	0.00246735	0.0029631	0.00325529	0.00360374	0.00271477			1583.25	0.00246735	0.00271477	0.00133809	0.000542076	0.00112103	0.000650586		1583.25	0.00246735	0.00271477	0.00181072	0.00138643	0.00296761	0.00181593
1582.93	0.00245316	0.00293896	0.00322954	0.00358073	0.00269022			1582.93	0.00245316	0.00269022	0.00132244	0.000523029	0.00110303	0.000635505		1582.93	0.00245316	0.00269022	0.00178326	0.00135555	0.0029397	0.00178809
1582.6	0.00243985	0.00291548	0.00320436	0.00355829	0.00266633			1582.6	0.00243985	0.00266633	0.00130732	0.000504751	0.00108576	0.000621175		1582.6	0.00243985	0.00266633	0.00175627	0.00132588	0.00291256	0.00176097
1582.28	0.00242745	0.00289284	0.00317987	0.00353656	0.00264322			1582.28	0.00242745	0.00264322	0.0012931	0.000487431	0.00106942	0.000607836		1582.28	0.00242745	0.00264322	0.00173017	0.00129755	0.00288637	0.00173492
1581.96	0.00241585	0.00287109	0.00315611	0.00351554	0.00262095			1581.96	0.00241585	0.00262095	0.00127997	0.000471018	0.00105416	0.000595583		1581.96	0.00241585	0.00262095	0.00170512	0.00127054	0.00286116	0.00171005
1581.64	0.00240509	0.00285033	0.00313311	0.00349529	0.00259963			1581.64	0.00240509	0.00259963	0.00126814	0.000455611	0.00104012	0.000584554		1581.64	0.00240509	0.00259963	0.00168126	0.00124491	0.00283686	0.0016865
1581.32	0.00239511	0.00283058	0.00311087	0.0034758	0.00257931			1581.32	0.00239511	0.00257931	0.00125766	0.000441263	0.00102737	0.000574813		1581.32	0.00239511	0.00257931	0.00165872	0.00122038	0.00281337	0.00166424
1581	0.00238595	0.00281188	0.00308945	0.00345714	0.00256008			1581	0.00238595	0.00256008	0.00124854	0.000428127	0.00101596	0.000566428		1581	0.00238595	0.00256008	0.00163756	0.00119698	0.00279061	0.0016432
1580.68	0.00237749	0.00279422	0.00306885	0.00343931	0.00254183			1580.68	0.00237749	0.00254183	0.00124063	0.000416096	0.00100587	0.00055932		1580.68	0.00237749	0.00254183	0.00161766	0.00117443	0.00276845	0.00162315
1580.35	0.00236987	0.0027776	0.00304916	0.00342235	0.00252454			1580.35	0.00236987	0.00252454	0.00123385	0.000405291	0.000997048	0.000553436		1580.35	0.00236987	0.00252454	0.00159907	0.00115279	0.00274696	0.00160397
1580.03	0.00236294	0.00276198	0.00303032	0.00340627	0.00250805			1580.03	0.00236294	0.00250805	0.00122805	0.000395656	0.000989374	0.000548651		1580.03	0.00236294	0.00250805	0.00158158	0.00113208	0.00272618	0.00158539

## Sheet: Derivatives
Wavenumber	0,2 mM D	0,4 mM D	0,6 mM D	0,8 mM D	1,0 mM D			Wavenumber	0,2 mM D	1,0 mM D	0,2 -> 0,2 5% D	1,0 -> 0,2 5% D	0,2 -> 1,0 5% D	1,0 -> 1,0 5% D			Wavenumber	0,2 mM D	1,0 mM D	0,2 -> 0,2 0,0001% D	1,0 -> 0,2 0,0001% D	0,2 -> 1,0 0,0001% D	1,0 -> 1,0 0,0001% D
1750.06	-1.78028e-08	2.35991e-07	2.31787e-07	2.97665e-07	2.87754e-07			1750.06	-1.78028e-08	2.87754e-07	2.41402e-07	3.07578e-07	2.34903e-07	3.33271e-07			1750.06	-1.78028e-08	2.87754e-07	2.32312e-07	2.30191e-07	2.26733e-07	3.01272e-07
1749.74	-5.91323e-08	2.43138e-07	2.30547e-07	3.11246e-07	2.9176e-07			1749.74	-5.91323e-08	2.9176e-07	2.29846e-07	3.1062e-07	2.39763e-07	3.39223e-07			1749.74	-5.91323e-08	2.9176e-07	2.24128e-07	2.26486e-07	2.25025e-07	3.11209e-07
1749.41	-1.05077e-07	2.48216e-07	2.2876e-07	3.23873e-07	2.92748e-07			1749.41	-1.05077e-07	2.92748e-07	2.15127e-07	3.11362e-07	2.43339e-07	3.41263e-07			1749.41	-1.05077e-07	2.92748e-07	2.12192e-07	2.11695e-07	2.2065e-07	3.16766e-07
1749.09	-1.56698e-07	2.50303e-07	2.26131e-07	3.35075e-07	2.90532e-07			1749.09	-1.56698e-07	2.90532e-07	1.97863e-07	3.0936e-07	2.45213e-07	3.40004e-07			1749.09	-1.56698e-07	2.90532e-07	1.96371e-07	1.84805e-07	2.13994e-07	3.17292e-07
1748.77	-2.1369e-07	2.4889e-07	2.23131e-07	3.44547e-07	2.8557e-07			1748.77	-2.1369e-07	2.8557e-07	1.79292e-07	3.0541e-07	2.45204e-07	3.36494e-07			1748.77	-2.1369e-07	2.8557e-07	1.77659e-07	1.45695e-07	2.05734e-07	3.13022e-07
1748.45	-2.75035e-07	2.4398e-07	2.20293e-07	3.52102e-07	2.78712e-07			1748.45	-2.75035e-07	2.78712e-07	1.6056e-07	2.99721e-07	2.43124e-07	3.31519e-07			1748.45	-2.75035e-07	2.78712e-07	1.57812e-07	9.55802e-08	1.96433e-07	3.04757e-07
1748.13	-3.38542e-07	2.36042e-07	2.18447e-07	3.57684e-07	2.71065e-07			1748.13	-3.38542e-07	2.71065e-07	1.43183e-07	2.93913e-07	2.39345e-07	3.26352e-07			1748.13	-3.38542e-07	2.71065e-07	1.39899e-07	3.78636e-08	1.86872e-07	2.94256e-07
1747.81	-4.01567e-07	2.26007e-07	2.18648e-07	3.61402e-07	2.63909e-07			1747.81	-4.01567e-07	2.63909e-07	1.28132e-07	2.88908e-07	2.34392e-07	3.21858e-07			1747.81	-4.01567e-07	2.63909e-07	1.26691e-07	-2.3977e-08	1.77768e-07	2.83041e-07
1747.49	-4.61528e-07	2.15284e-07	2.21602e-07	3.63358e-07	2.58324e-07			1747.49	-4.61528e-07	2.58324e-07	1.16285e-07	2.85766e-07	2.29066e-07	3.18885e-07			1747.49	-4.61528e-07	2.58324e-07	1.20083e-07	-8.52488e-08	1.69475e-07	2.72606e-07
1747.16	-5.16624e-07	2.05176e-07	2.27704e-07	3.63761e-07	2.55085e-07			1747.16	-5.16624e-07	2.55085e-07	1.08212e-07	2.84808e-07	2.24177e-07	3.18077e-07			1747.16	-5.16624e-07	2.55085e-07	1.21008e-07	-1.41713e-07	1.62702e-07	2.63983e-07
1746.84	-5.65676e-07	1.96938e-07	2.36925e-07	3.62728e-07	2.54272e-07			1746.84	-5.65676e-07	2.54272e-07	1.03693e-07	2.86163e-07	2.2029e-07	3.19941e-07			1746.84	-5.65676e-07	2.54272e-07	1.28927e-07	-1.89254e-07	1.57828e-07	2.57171e-07
1746.52	-6.08655e-07	1.91197e-07	2.48733e-07	3.60531e-07	2.55877e-07			1746.52	-6.08655e-07	2.55877e-07	1.02473e-07	2.89711e-07	2.17926e-07	3.24927e-07			1746.52	-6.08655e-07	2.55877e-07	1.4239e-07	-2.2516e-07	1.55414e-07	2.51704e-07
1746.2	-6.47065e-07	1.88114e-07	2.61931e-07	3.57162e-07	2.58864e-07			1746.2	-6.47065e-07	2.58864e-07	1.03789e-07	2.94281e-07	2.17018e-07	3.32694e-07			1746.2	-6.47065e-07	2.58864e-07	1.58985e-07	-2.49137e-07	1.55623e-07	2.46153e-07
1745.88	-6.82075e-07	1.87427e-07	2.75599e-07	3.52842e-07	2.62379e-07			1745.88	-6.82075e-07	2.62379e-07	1.07086e-07	2.99327e-07	2.17446e-07	3.43132e-07			1745.88	-6.82075e-07	2.62379e-07	1.76416e-07	-2.61728e-07	1.58417e-07	2.38806e-07
1745.56	-7.15856e-07	1.88339e-07	2.88317e-07	3.47711e-07	2.65006e-07			1745.56	-7.15856e-07	2.65006e-07	1.11342e-07	3.03658e-07	2.18947e-07	3.55387e-07			1745.56	-7.15856e-07	2.65006e-07	1.92508e-07	-2.65335e-07	1.63435e-07	2.28594e-07
1745.24	-7.50111e-07	1.89874e-07	2.99036e-07	3.41905e-07	2.65285e-07			1745.24	-7.50111e-07	2.65285e-07	1.15362e-07	3.0584e-07	2.21106e-07	3.68353e-07			1745.24	-7.50111e-07	2.65285e-07	2.05626e-07	-2.63702e-07	1.69621e-07	2.14364e-07
1744.91	-7.86277e-07	1.91249e-07	3.0679e-07	3.35597e-07	2.61926e-07			1744.91	-7.86277e-07	2.61926e-07	1.18028e-07	3.0511e-07	2.23812e-07	3.80716e-07			1744.91	-7.86277e-07	2.61926e-07	2.15507e-07	-2.59703e-07	1.75994e-07	1.95836e-07
1744.59	-8.24169e-07	1.92006e-07	3.11367e-07	3.29095e-07	2.54425e-07			1744.59	-8.24169e-07	2.54425e-07	1.19043e-07	3.01065e-07	2.27344e-07	3.91643e-07			1744.59	-8.24169e-07	2.54425e-07	2.22384e-07	-2.55195e-07	1.8165e-07	1.74088e-07
1744.27	-8.63085e-07	1.92035e-07	3.12557e-07	3.228e-07	2.42956e-07			1744.27	-8.63085e-07	2.42956e-07	1.17993e-07	2.93889e-07	2.31978e-07	4.00224e-07			1744.27	-8.63085e-07	2.42956e-07	2.27316e-07	-2.50114e-07	1.85846e-07	1.50577e-07
1743.95	-9.01266e-07	1.91515e-07	3.10959e-07	3.17269e-07	2.28657e-07			1743.95	-9.01266e-07	2.28657e-07	1.15519e-07	2.85321e-07	2.38416e-07	4.06681e-07			1743.95	-9.01266e-07	2.28657e-07	2.32009e-07	-2.43069e-07	1.88887e-07	1.2794e-07
1743.63	-9.37149e-07	1.90654e-07	3.07137e-07	3.13167e-07	2.1321e-07			1743.63	-9.37149e-07	2.1321e-07	1.12473e-07	2.76905e-07	2.47105e-07	4.11459e-07			1743.63	-9.37149e-07	2.1321e-07	2.37208e-07	-2.32673e-07	1.91193e-07	1.07971e-07
1743.31	-9.68537e-07	1.89751e-07	3.02115e-07	3.11251e-07	1.98896e-07			1743.31	-9.68537e-07	1.98896e-07	1.10167e-07	2.70685e-07	2.58477e-07	4.15486e-07			1743.31	-9.68537e-07	1.98896e-07	2.4414e-07	-2.17555e-07	1.9394e-07	9.27785e-08
1742.99	-9.94022e-07	1.89168e-07	2.96943e-07	3.12225e-07	1.88052e-07			1742.99	-9.94022e-07	1.88052e-07	1.0986e-07	2.68281e-07	2.72509e-07	4.19509e-07			1742.99	-9.94022e-07	1.88052e-07	2.52645e-07	-1.97835e-07	1.9829e-07	8.3475e-08
1742.66	-1.01306e-06	1.89081e-07	2.92026e-07	3.16585e-07	1.82089e-07			1742.66	-1.01306e-06	1.82089e-07	1.12271e-07	2.70118e-07	2.8852e-07	4.23862e-07			1742.66	-1.01306e-06	1.82089e-07	2.62414e-07	-1.76049e-07	2.04978e-07	8.0367e-08
1742.34	-1.02553e-06	1.89832e-07	2.88109e-07	3.24724e-07	1.81873e-07			1742.34	-1.02553e-06	1.81873e-07	1.17819e-07	2.75736e-07	3.05774e-07	4.28527e-07			1742.34	-1.02553e-06	1.81873e-07	2.72786e-07	-1.55469e-07	2.14429e-07	8.31776e-08
1742.02	-1.03142e-06	1.91662e-07	2.85794e-07	3.36779e-07	1.87233e-07			1742.02	-1.03142e-06	1.87233e-07	1.26506e-07	2.84437e-07	3.23563e-07	4.33425e-07			1742.02	-1.03142e-06	1.87233e-07	2.83207e-07	-1.40396e-07	2.26687e-07	9.11041e-08
1741.7	-1.0309e-06	1.95143e-07	2.85304e-07	3.52495e-07	1.97186e-07			1741.7	-1.0309e-06	1.97186e-07	1.38043e-07	2.94733e-07	3.41305e-07	4.38054e-07			1741.7	-1.0309e-06	1.97186e-07	2.93581e-07	-1.33642e-07	2.41356e-07	1.02831e-07
1741.38	-1.02319e-06	2.01045e-07	2.87474e-07	3.71665e-07	2.10692e-07			1741.38	-1.02319e-06	2.10692e-07	1.52457e-07	3.06296e-07	3.59101e-07	4.42676e-07			1741.38	-1.02319e-06	2.10692e-07	3.05268e-07	-1.35779e-07	2.58207e-07	1.17564e-07
1741.06	-1.0077e-06	2.10033e-07	2.92805e-07	3.93822e-07	2.26469e-07			1741.06	-1.0077e-06	2.26469e-07	1.69704e-07	3.18382e-07	3.77305e-07	4.47663e-07			1741.06	-1.0077e-06	2.26469e-07	3.18915e-07	-1.45256e-07	2.76922e-07	1.34079e-07
1740.74	-9.83399e-07	2.23029e-07	3.02134e-07	4.18674e-07	2.43809e-07			1740.74	-9.83399e-07	2.43809e-07	1.90095e-07	3.30849e-07	3.96851e-07	4.5422e-07			1740.74	-9.83399e-07	2.43809e-07	3.35787e-07	-1.57715e-07	2.97453e-07	1.51797e-07
1740.41	-9.49085e-07	2.40997e-07	3.16218e-07	4.46125e-07	2.62455e-07			1740.41	-9.49085e-07	2.62455e-07	2.14257e-07	3.44125e-07	4.18799e-07	4.63796e-07			1740.41	-9.49085e-07	2.62455e-07	3.56468e-07	-1.68319e-07	3.19943e-07	1.70477e-07
1740.09	-9.03639e-07	2.64994e-07	3.36299e-07	4.76706e-07	2.83238e-07			1740.09	-9.03639e-07	2.83238e-07	2.43167e-07	3.5861e-07	4.44333e-07	4.78205e-07			1740.09	-9.03639e-07	2.83238e-07	3.80737e-07	-1.71548e-07	3.45078e-07	1.90292e-07
1739.77	-8.4609e-07	2.96153e-07	3.63399e-07	5.11326e-07	3.07504e-07			1739.77	-8.4609e-07	3.07504e-07	2.77706e-07	3.75283e-07	4.74478e-07	4.98972e-07			1739.77	-8.4609e-07	3.07504e-07	4.07504e-07	-1.63396e-07	3.7365e-07	2.12141e-07
1739.45	-7.75393e-07	3.35584e-07	3.98796e-07	5.51528e-07	3.37205e-07			1739.45	-7.75393e-07	3.37205e-07	3.18848e-07	3.95254e-07	5.1041e-07	5.2778e-07			1739.45	-7.75393e-07	3.37205e-07	4.36171e-07	-1.40579e-07	4.07268e-07	2.37245e-07
1739.13	-6.90825e-07	3.84264e-07	4.43208e-07	5.99024e-07	3.7411e-07			1739.13	-6.90825e-07	3.7411e-07	3.67272e-07	4.20303e-07	5.52872e-07	5.6568e-07			1739.13	-6.90825e-07	3.7411e-07	4.6606e-07	-1.02079e-07	4.47184e-07	2.67071e-07
1738.81	-5.92213e-07	4.43051e-07	4.97621e-07	6.55568e-07	4.20407e-07			1738.81	-5.92213e-07	4.20407e-07	4.23846e-07	4.5247e-07	6.0299e-07	6.13557e-07			1738.81	-5.92213e-07	4.20407e-07	4.97448e-07	-4.80759e-08	4.95182e-07	3.03493e-07
1738.49	-4.79292e-07	5.12665e-07	5.62463e-07	7.22799e-07	4.77201e-07			1738.49	-4.79292e-07	4.77201e-07	4.89121e-07	4.93967e-07	6.61676e-07	6.71939e-07			1738.49	-4.79292e-07	4.77201e-07	5.31652e-07	2.09384e-08	5.52455e-07	3.48434e-07
1738.16	-3.51473e-07	5.93695e-07	6.38315e-07	8.01996e-07	5.45747e-07			1738.16	-3.51473e-07	5.45747e-07	5.6414e-07	5.48244e-07	7.30095e-07	7.41628e-07			1738.16	-3.51473e-07	5.45747e-07	5.71296e-07	1.06588e-07	6.20291e-07	4.04366e-07
1737.84	-2.08678e-07	6.86428e-07	7.2504e-07	8.93744e-07	6.26491e-07			1737.84	-2.08678e-07	6.26491e-07	6.49591e-07	6.17718e-07	8.0916e-07	8.22801e-07			1737.84	-2.08678e-07	6.26491e-07	6.19394e-07	2.10736e-07	6.99343e-07	4.73661e-07
1737.52	-5.08404e-08	7.90746e-07	8.22593e-07	9.97913e-07	7.19564e-07			1737.52	-5.08404e-08	7.19564e-07	7.46159e-07	7.05111e-07	8.99373e-07	9.1576e-07			1737.52	-5.08404e-08	7.19564e-07	6.79408e-07	3.36276e-07	7.89864e-07	5.58196e-07
1737.2	1.21275e-07	9.06021e-07	9.29953e-07	1.11348e-06	8.24686e-07			1737.2	1.21275e-07	8.24686e-07	8.54027e-07	8.11822e-07	1.00058e-06	1.01944e-06			1737.2	1.21275e-07	8.24686e-07	7.53651e-07	4.85533e-07	8.91158e-07	6.59338e-07
1736.88	3.06465e-07	1.03069e-06	1.04557e-06	1.23849e-06	9.40904e-07			1736.88	3.06465e-07	9.40904e-07	9.72415e-07	9.38042e-07	1.1113e-06	1.13233e-06			1736.88	3.06465e-07	9.40904e-07	8.42995e-07	6.58275e-07	1.00173e-06	7.77383e-07
1736.56	5.01376e-07	1.16195e-06	1.16661e-06	1.3698e-06	1.06602e-06			1736.56	5.01376e-07	1.06602e-06	1.0986e-06	1.08125e-06	1.22858e-06	1.25086e-06			1736.56	5.01376e-07	1.06602e-06	9.45965e-07	8.5048e-07	1.11885e-06	9.09831e-07
1736.24	7.01081e-07	1.29557e-06	1.28892e-06	1.50303e-06	1.19616e-06			1736.24	7.01081e-07	1.19616e-06	1.22816e-06	1.23634e-06	1.34781e-06	1.37024e-06			1736.24	7.01081e-07	1.19616e-06	1.0582e-06	1.05253e-06	1.23842e-06	1.05213e-06
1735.92	8.98686e-07	1.42575e-06	1.40708e-06	1.63259e-06	1.32564e-06			1735.92	8.98686e-07	1.32564e-06	1.35451e-06	1.39466e-06	1.46286e-06	1.48386e-06			1735.92	8.98686e-07	1.32564e-06	1.17264e-06	1.25156e-06	1.35452e-06	1.19656e-06
1735.59	1.08509e-06	1.54517e-06	1.51417e-06	1.75145e-06	1.4466e-06			1735.59	1.08509e-06	1.4466e-06	1.46899e-06	1.54495e-06	1.5659e-06	1.58374e-06			1735.59	1.08509e-06	1.4466e-06	1.27977e-06	1.43102e-06	1.45969e-06	1.33302e-06
1735.27	1.24992e-06	1.64516e-06	1.60196e-06	1.85142e-06	1.54949e-06			1735.27	1.24992e-06	1.54949e-06	1.56162e-06	1.67426e-06	1.64824e-06	1.66138e-06			1735.27	1.24992e-06	1.54949e-06	1.36793e-06	1.57464e-06	1.54534e-06	1.44959e-06
1734.95	1.38173e-06	1.716e-06	1.66106e-06	1.92331e-06	1.62335e-06			1734.95	1.38173e-06	1.62335e-06	1.62183e-06	1.7691e-06	1.70049e-06	1.70818e-06			1734.95	1.38173e-06	1.62335e-06	1.4252e-06	1.6673e-06	1.60189e-06	1.5338e-06
1734.63	1.46941e-06	1.74757e-06	1.68186e-06	1.95733e-06	1.65714e-06			1734.63	1.46941e-06	1.65714e-06	1.6395e-06	1.81671e-06	1.71351e-06	1.71634e-06			1734.63	1.46941e-06	1.65714e-06	1.43991e-06	1.69877e-06	1.62006e-06	1.57383e-06
1734.31	1.50213e-06	1.72935e-06	1.65437e-06	1.94317e-06	1.64002e-06			1734.31	1.50213e-06	1.64002e-06	1.60503e-06	1.80604e-06	1.67816e-06	1.6788e-06			1734.31	1.50213e-06	1.64002e-06	1.40157e-06	1.66104e-06	1.59063e-06	1.55886e-06
1733.99	1.47031e-06	1.65149e-06	1.56909e-06	1.8709e-06	1.56276e-06			1733.99	1.47031e-06	1.56276e-06	1.51031e-06	1.72805e-06	1.58621e-06	1.58937e-06			1733.99	1.47031e-06	1.56276e-06	1.30147e-06	1.55075e-06	1.50549e-06	1.48029e-06
1733.67	1.36602e-06	1.50531e-06	1.41785e-06	1.73145e-06	1.41795e-06			1733.67	1.36602e-06	1.41795e-06	1.34875e-06	1.5763e-06	1.43055e-06	1.44324e-06			1733.67	1.36602e-06	1.41795e-06	1.13281e-06	1.36659e-06	1.35747e-06	1.33173e-06
1733.34	1.18348e-06	1.28399e-06	1.19424e-06	1.5175e-06	1.20091e-06			1733.34	1.18348e-06	1.20091e-06	1.11547e-06	1.34618e-06	1.2059e-06	1.23631e-06			1733.34	1.18348e-06	1.20091e-06	8.90451e-07	1.1079e-06	1.14131e-06	1.10896e-06
1733.02	9.20144e-07	9.83904e-07	8.95363e-07	1.22433e-06	9.1024e-07			1733.02	9.20144e-07	9.1024e-07	8.08431e-07	1.03667e-06	9.09568e-07	9.66435e-07			1733.02	9.20144e-07	9.1024e-07	5.72657e-07	7.75628e-07	8.54155e-07	8.11238e-07
1732.7	5.7782e-07	6.0539e-07	5.21856e-07	8.50936e-07	5.48346e-07			1732.7	5.7782e-07	5.48346e-07	4.28984e-07	6.50138e-07	5.42323e-07	6.33447e-07			1732.7	5.7782e-07	5.48346e-07	1.81001e-07	3.72154e-07	4.96539e-07	4.40923e-07
1732.38	1.62856e-07	1.53257e-07	7.94803e-08	4.00679e-07	1.21758e-07			1732.38	1.62856e-07	1.21758e-07	-1.73719e-08	1.93492e-07	1.09318e-07	2.40628e-07			1732.38	1.62856e-07	1.21758e-07	-2.78189e-07	-9.5516e-08	7.30575e-08	4.89604e-09
1732.06	-3.12825e-07	-3.62517e-07	-4.21492e-07	-1.18424e-07	-3.59059e-07			1732.06	-3.12825e-07	-3.59059e-07	-5.20059e-07	-3.214e-07	-3.79566e-07	-2.04965e-07			1732.06	-3.12825e-07	-3.59059e-07	-7.93034e-07	-6.17386e-07	-4.07189e-07	-4.85736e-07
1731.74	-8.32671e-07	-9.27312e-07	-9.66345e-07	-6.93585e-07	-8.80029e-07			1731.74	-8.32671e-07	-8.80029e-07	-1.06389e-06	-8.77951e-07	-9.10067e-07	-6.91896e-07			1731.74	-8.32671e-07	-8.80029e-07	-1.34655e-06	-1.17729e-06	-9.30578e-07	-1.01586e-06
1731.42	-1.37574e-06	-1.52223e-06	-1.53647e-06	-1.30764e-06	-1.4238e-06			1731.42	-1.37574e-06	-1.4238e-06	-1.62907e-06	-1.45534e-06	-1.46391e-06	-1.20474e-06			1731.42	-1.37574e-06	-1.4238e-06	-1.91745e-06	-1.75499e-06	-1.47941e-06	-1.56652e-06
1731.09	-1.91788e-06	-2.12479e-06	-2.11045e-06	-1.94003e-06	-1.97068e-06			1731.09	-1.91788e-06	-1.97068e-06	-2.19228e-06	-2.03039e-06	-2.01964e-06	-1.72453e-06			1731.09	-1.91788e-06	-1.97068e-06	-2.48038e-06	-2.3257e-06	-2.03318e-06	-2.11603e-06
1730.77	-2.43289e-06	-2.71071e-06	-2.6653e-06	-2.56745e-06	-2.49982e-06			1730.77	-2.43289e-06	-2.49982e-06	-2.72866e-06	-2.57794e-06	-2.55415e-06	-2.23032e-06			1730.77	-2.43289e-06	-2.49982e-06	-3.00909e-06	-2.8626e-06	-2.56944e-06	-2.6416e-06
1730.45	-2.89613e-06	-3.25518e-06	-3.17848e-06	-3.16594e-06	-2.99056e-06			1730.45	-2.89613e-06	-2.99056e-06	-3.21395e-06	-3.07495e-06	-3.04475e-06	-2.7011e-06			1730.45	-2.89613e-06	-2.99056e-06	-3.4787e-06	-3.34094e-06	-3.06596e-06	-3.12102e-06
1730.13	-3.28496e-06	-3.73439e-06	-3.62822e-06	-3.71159e-06	-3.42341e-06			1730.13	-3.28496e-06	-3.42341e-06	-3.62584e-06	-3.50061e-06	-3.46984e-06	-3.11698e-06			1730.13	-3.28496e-06	-3.42341e-06	-3.86721e-06	-3.73914e-06	-3.50169e-06	-3.53426e-06
1729.81	-3.58016e-06	-4.12695e-06	-3.99503e-06	-4.18213e-06	-3.78084e-06			1729.81	-3.58016e-06	-3.78084e-06	-3.9455e-06	-3.83719e-06	-3.81058e-06	-3.46051e-06			1729.81	-3.58016e-06	-3.78084e-06	-4.15711e-06	-4.04036e-06	-3.85774e-06	-3.86429e-06
1729.49	-3.76824e-06	-4.41514e-06	-4.26342e-06	-4.5582e-06	-4.04872e-06			1729.49	-3.76824e-06	-4.04872e-06	-4.1593e-06	-4.07196e-06	-4.05203e-06	-3.7182e-06			1729.49	-3.76824e-06	-4.04872e-06	-4.33675e-06	-4.23389e-06	-4.11911e-06	-4.09815e-06
1729.17	-3.84094e-06	-4.58625e-06	-4.42166e-06	-4.82414e-06	-4.21676e-06			1729.17	-3.84094e-06	-4.21676e-06	-4.25869e-06	-4.19613e-06	-4.1838e-06	-3.87986e-06			1729.17	-3.84094e-06	-4.21676e-06	-4.40011e-06	-4.31478e-06	-4.27471e-06	-4.22747e-06
1728.84	-3.79633e-06	-4.63303e-06	-4.46328e-06	-4.9691e-06	-4.27915e-06			1728.84	-3.79633e-06	-4.27915e-06	-4.24094e-06	-4.20638e-06	-4.20053e-06	-3.94009e-06			1728.84	-3.79633e-06	-4.27915e-06	-4.34727e-06	-4.28347e-06	-4.31864e-06	-4.24897e-06
1728.52	-3.63809e-06	-4.55424e-06	-4.38722e-06	-4.98733e-06	-4.23457e-06			1728.52	-3.63809e-06	-4.23457e-06	-4.10851e-06	-4.10378e-06	-4.10219e-06	-3.89716e-06			1728.52	-3.63809e-06	-4.23457e-06	-4.18326e-06	-4.14396e-06	-4.2501e-06	-4.1636e-06
1728.2	-3.37504e-06	-4.35449e-06	-4.19733e-06	-4.87861e-06	-4.08599e-06			1728.2	-3.37504e-06	-4.08599e-06	-3.86835e-06	-3.89347e-06	-3.89386e-06	-3.75346e-06			1728.2	-3.37504e-06	-4.08599e-06	-3.9171e-06	-3.90255e-06	-4.07329e-06	-3.9763e-06
1727.88	-3.02067e-06	-4.04413e-06	-3.9033e-06	-4.64851e-06	-3.84071e-06			1727.88	-3.02067e-06	-3.84071e-06	-3.53214e-06	-3.58525e-06	-3.58577e-06	-3.51547e-06			1727.88	-3.02067e-06	-3.84071e-06	-3.56163e-06	-3.56849e-06	-3.79732e-06	-3.69612e-06
1727.56	-2.59163e-06	-3.63843e-06	-3.51929e-06	-4.30803e-06	-3.50998e-06			1727.56	-2.59163e-06	-3.50998e-06	-3.11482e-06	-3.19221e-06	-3.19231e-06	-3.19309e-06			1727.56	-2.59163e-06	-3.50998e-06	-3.1324e-06	-3.15307e-06	-3.43521e-06	-3.33485e-06
1727.24	-2.10814e-06	-3.15669e-06	-3.06332e-06	-3.8731e-06	-3.10826e-06			1727.24	-2.10814e-06	-3.10826e-06	-2.63452e-06	-2.73093e-06	-2.73167e-06	-2.79991e-06			1727.24	-2.10814e-06	-3.10826e-06	-2.64694e-06	-2.67137e-06	-3.00351e-06	-2.90717e-06
1726.92	-1.59094e-06	-2.62105e-06	-2.55617e-06	-3.36375e-06	-2.65254e-06			1726.92	-1.59094e-06	-2.65254e-06	-2.11174e-06	-2.22041e-06	-2.2245e-06	-2.35246e-06			1726.92	-1.59094e-06	-2.65254e-06	-2.12451e-06	-2.14087e-06	-2.52087e-06	-2.42952e-06
1726.59	-1.06304e-06	-2.0556e-06	-2.02048e-06	-2.80325e-06	-2.1619e-06			1726.59	-1.06304e-06	-2.1619e-06	-1.56865e-06	-1.68241e-06	-1.6932e-06	-1.87001e-06			1726.59	-1.06304e-06	-2.1619e-06	-1.58625e-06	-1.58464e-06	-2.00789e-06	-1.92038e-06
1726.27	-5.46092e-07	-1.48413e-06	-1.4788e-06	-2.21596e-06	-1.65597e-06			1726.27	-5.46092e-07	-1.65597e-06	-1.02753e-06	-1.13882e-06	-1.16011e-06	-1.37299e-06			1726.27	-5.46092e-07	-1.65597e-06	-1.05349e-06	-1.02643e-06	-1.48523e-06	-1.39918e-06
1725.95	-6.04433e-08	-9.2923e-07	-9.52203e-07	-1.62611e-06	-1.15416e-06			1725.95	-6.04433e-08	-1.15416e-06	-5.09942e-07	-6.11479e-07	-6.46255e-07	-8.81834e-07			1725.95	-6.04433e-08	-1.15416e-06	-5.46562e-07	-4.9059e-07	-9.72953e-07	-8.8528e-07
1725.63	3.76796e-07	-4.10712e-07	-4.59202e-07	-1.05605e-06	-6.7426e-07			1725.63	3.76796e-07	-6.7426e-07	-3.45367e-08	-1.20173e-07	-1.69891e-07	-4.15672e-07			1725.63	3.76796e-07	-6.7426e-07	-8.36246e-08	-6.58929e-10	-4.89134e-07	-3.97437e-07
1725.31	7.52952e-07	5.58105e-08	-1.42365e-08	-5.24881e-07	-2.31606e-07			1725.31	7.52952e-07	-2.31606e-07	3.84183e-07	3.1883e-07	2.54306e-07	9.22739e-09			1725.31	7.52952e-07	-2.31606e-07	3.21051e-07	4.26179e-07	-4.89844e-08	4.81396e-08
1724.99	1.06068e-06	4.59362e-07	3.72422e-07	-4.73008e-08	1.62088e-07			1724.99	1.06068e-06	1.62088e-07	7.36318e-07	6.93554e-07	6.16375e-07	3.80156e-07			1724.99	1.06068e-06	1.62088e-07	6.58528e-07	7.78803e-07	3.36125e-07	4.3843e-07
1724.67	1.29771e-06	7.93761e-07	6.95133e-07	3.66451e-07	4.98636e-07			1724.67	1.29771e-06	4.98636e-07	1.01736e-06	9.96321e-07	9.1063e-07	6.89055e-07			1724.67	1.29771e-06	4.98636e-07	9.2507e-07	1.05243e-06	6.58757e-07	7.64424e-07
1724.34	1.46692e-06	1.05765e-06	9.52122e-07	7.10865e-07	7.73899e-07			1724.34	1.46692e-06	7.73899e-07	1.22748e-06	1.22497e-06	1.1357e-06	9.32188e-07			1724.34	1.46692e-06	7.73899e-07	1.12181e-06	1.24824e-06	9.15746e-07	1.02191e-06
1724.02	1.57417e-06	1.25315e-06	1.14466e-06	9.84389e-07	9.86852e-07			1724.02	1.57417e-06	9.86852e-07	1.37031e-06	1.38109e-06	1.2936e-06	1.1095e-06			1724.02	1.57417e-06	9.86852e-07	1.25326e-06	1.37186e-06	1.10724e-06	1.21042e-06
1723.7	1.62836e-06	1.38551e-06	1.27702e-06	1.18924e-06	1.14001e-06			1723.7	1.62836e-06	1.14001e-06	1.45272e-06	1.47e-06	1.38947e-06	1.22483e-06			1723.7	1.62836e-06	1.14001e-06	1.32696e-06	1.43297e-06	1.23689e-06	1.33407e-06
1723.38	1.63907e-06	1.46179e-06	1.35499e-06	1.33005e-06	1.23811e-06			1723.38	1.63907e-06	1.23811e-06	1.48317e-06	1.49951e-06	1.43029e-06	1.28423e-06			1723.38	1.63907e-06	1.23811e-06	1.35194e-06	1.442e-06	1.31052e-06	1.39976e-06
1723.06	1.61561e-06	1.48984e-06	1.3859e-06	1.4136e-06	1.28753e-06			1723.06	1.61561e-06	1.28753e-06	1.47033e-06	1.4795e-06	1.42444e-06	1.29557e-06			1723.06	1.61561e-06	1.28753e-06	1.33681e-06	1.4107e-06	1.33593e-06	1.41628e-06
1722.74	1.56654e-06	1.47825e-06	1.37749e-06	1.44763e-06	1.29566e-06			1722.74	1.56654e-06	1.29566e-06	1.42308e-06	1.42023e-06	1.3809e-06	1.26757e-06			1722.74	1.56654e-06	1.29566e-06	1.29092e-06	1.35108e-06	1.32169e-06	1.39358e-06
1722.42	1.49988e-06	1.43534e-06	1.33842e-06	1.44064e-06	1.27063e-06			1722.42	1.49988e-06	1.27063e-06	1.35061e-06	1.33269e-06	1.30903e-06	1.20937e-06			1722.42	1.49988e-06	1.27063e-06	1.22302e-06	1.27521e-06	1.27717e-06	1.34163e-06
1722.09	1.42303e-06	1.36911e-06	1.27703e-06	1.40131e-06	1.22078e-06			1722.09	1.42303e-06	1.22078e-06	1.26103e-06	1.22764e-06	1.21778e-06	1.12977e-06			1722.09	1.42303e-06	1.22078e-06	1.14211e-06	1.19409e-06	1.21176e-06	1.27006e-06
1721.77	1.3413e-06	1.28678e-06	1.20055e-06	1.33773e-06	1.15339e-06			1721.77	1.3413e-06	1.15339e-06	1.16133e-06	1.11381e-06	1.11492e-06	1.03644e-06			1721.77	1.3413e-06	1.15339e-06	1.05571e-06	1.11675e-06	1.13347e-06	1.18694e-06
1721.45	1.25963e-06	1.19463e-06	1.11537e-06	1.25746e-06	1.07492e-06			1721.45	1.25963e-06	1.07492e-06	1.05775e-06	9.98083e-07	1.00704e-06	9.35894e-07			1721.45	1.25963e-06	1.07492e-06	9.69962e-07	1.0488e-06	1.04894e-06	1.0987e-06
1721.13	1.1815e-06	1.09777e-06	1.02607e-06	1.16681e-06	9.9072e-07			1721.13	1.1815e-06	9.9072e-07	9.54576e-07	8.84546e-07	8.99084e-07	8.32757e-07			1721.13	1.1815e-06	9.9072e-07	8.89264e-07	9.92409e-07	9.63214e-07	1.00989e-06
1720.81	1.10961e-06	1.00029e-06	9.36033e-07	1.07115e-06	9.05057e-07			1720.81	1.10961e-06	9.05057e-07	8.55179e-07	7.75624e-07	7.94358e-07	7.30564e-07			1720.81	1.10961e-06	9.05057e-07	8.16381e-07	9.47515e-07	8.79713e-07	9.23639e-07
1720.49	1.04517e-06	9.04706e-07	8.47385e-07	9.7437e-07	8.20859e-07			1720.49	1.04517e-06	8.20859e-07	7.61102e-07	6.71861e-07	6.94788e-07	6.31097e-07			1720.49	1.04517e-06	8.20859e-07	7.52025e-07	9.10469e-07	8.00233e-07	8.41499e-07
1720.17	9.88568e-07	8.12634e-07	7.61311e-07	8.79106e-07	7.4015e-07			1720.17	9.88568e-07	7.4015e-07	6.72803e-07	5.72358e-07	6.01219e-07	5.35433e-07			1720.17	9.88568e-07	7.4015e-07	6.95175e-07	8.77414e-07	7.25507e-07	7.63808e-07
1719.84	9.39285e-07	7.24734e-07	6.78657e-07	7.86957e-07	6.63933e-07			1719.84	9.39285e-07	6.63933e-07	5.90082e-07	4.76415e-07	5.13855e-07	4.44012e-07			1719.84	9.39285e-07	6.63933e-07	6.44352e-07	8.43459e-07	6.55792e-07	6.90681e-07
1719.52	8.95868e-07	6.41065e-07	6.00272e-07	6.98737e-07	5.92964e-07			1719.52	8.95868e-07	5.92964e-07	5.12579e-07	3.83437e-07	4.32643e-07	3.57109e-07			1719.52	8.95868e-07	5.92964e-07	5.97854e-07	8.05016e-07	5.91109e-07	6.21705e-07
1719.2	8.56887e-07	5.6136e-07	5.26659e-07	6.14673e-07	5.27301e-07			1719.2	8.56887e-07	5.27301e-07	4.3974e-07	2.9351e-07	3.57305e-07	2.74815e-07			1719.2	8.56887e-07	5.27301e-07	5.54124e-07	7.60615e-07	5.31387e-07	5.56767e-07
1718.88	8.2043e-07	4.8545e-07	4.58183e-07	5.3482e-07	4.66907e-07			1718.88	8.2043e-07	4.66907e-07	3.71578e-07	2.072e-07	2.87746e-07	1.97419e-07			1718.88	8.2043e-07	4.66907e-07	5.12349e-07	7.09333e-07	4.76614e-07	4.95431e-07
1718.56	7.85256e-07	4.1363e-07	3.95153e-07	4.594e-07	4.11681e-07			1718.56	7.85256e-07	4.11681e-07	3.0836e-07	1.26048e-07	2.23888e-07	1.25107e-07			1718.56	7.85256e-07	4.11681e-07	4.72842e-07	6.53341e-07	4.26975e-07	4.37154e-07
1718.24	7.50411e-07	3.46387e-07	3.37587e-07	3.88596e-07	3.61367e-07			1718.24	7.50411e-07	3.61367e-07	2.50528e-07	5.13987e-08	1.65677e-07	5.78488e-08			1718.24	7.50411e-07	3.61367e-07	4.36395e-07	5.95148e-07	3.8236e-07	3.81855e-07
1717.92	7.1572e-07	2.84687e-07	2.85217e-07	3.22788e-07	3.15545e-07			1717.92	7.1572e-07	3.15545e-07	1.98591e-07	-1.59719e-08	1.12878e-07	-4.57851e-09			1717.92	7.1572e-07	3.15545e-07	4.0364e-07	5.37669e-07	3.42399e-07	3.28905e-07
1717.59	6.8169e-07	2.29519e-07	2.37951e-07	2.62415e-07	2.74002e-07			1717.59	6.8169e-07	2.74002e-07	1.5281e-07	-7.56113e-08	6.48495e-08	-6.2837e-08			1717.59	6.8169e-07	2.74002e-07	3.7522e-07	4.84537e-07	3.06643e-07	2.78521e-07
1717.27	6.48859e-07	1.81596e-07	1.95562e-07	2.07675e-07	2.36403e-07			1717.27	6.48859e-07	2.36403e-07	1.12501e-07	-1.27965e-07	2.10022e-08	-1.17692e-07			1717.27	6.48859e-07	2.36403e-07	3.50809e-07	4.3763e-07	2.74259e-07	2.30884e-07
1716.95	6.17346e-07	1.4107e-07	1.57591e-07	1.585e-07	2.02366e-07			1716.95	6.17346e-07	2.02366e-07	7.71058e-08	-1.74324e-07	-1.95881e-08	-1.6978e-07			1716.95	6.17346e-07	2.02366e-07	3.28729e-07	3.97285e-07	2.44368e-07	1.86541e-07
1716.63	5.86906e-07	1.07506e-07	1.23992e-07	1.14808e-07	1.71652e-07			1716.63	5.86906e-07	1.71652e-07	4.54504e-08	-2.15247e-07	-5.74648e-08	-2.19664e-07			1716.63	5.86906e-07	1.71652e-07	3.07453e-07	3.62874e-07	2.16098e-07	1.46985e-07
1716.31	5.56626e-07	7.96767e-08	9.43791e-08	7.62365e-08	1.44093e-07			1716.31	5.56626e-07	1.44093e-07	1.65878e-08	-2.515e-07	-9.29266e-08	-2.67294e-07			1716.31	5.56626e-07	1.44093e-07	2.85256e-07	3.32594e-07	1.88995e-07	1.13351e-07
1715.99	5.25562e-07	5.6298e-08	6.84532e-08	4.25393e-08	1.20138e-07			1715.99	5.25562e-07	1.20138e-07	-1.01537e-08	-2.83256e-07	-1.25955e-07	-3.11883e-07			1715.99	5.25562e-07	1.20138e-07	2.61371e-07	3.04411e-07	1.63158e-07	8.71132e-08
1715.67	4.92636e-07	3.60428e-08	4.58757e-08	1.33275e-08	1.0005e-07			1715.67	4.92636e-07	1.0005e-07	-3.49571e-08	-3.09961e-07	-1.56176e-07	-3.52404e-07			1715.67	4.92636e-07	1.0005e-07	2.36278e-07	2.76957e-07	1.38994e-07	6.93008e-08
1715.35	4.57435e-07	1.81759e-08	2.66558e-08	-1.14374e-08	8.44628e-08			1715.35	4.57435e-07	8.44628e-08	-5.7271e-08	-3.30495e-07	-1.82878e-07	-3.87207e-07			1715.35	4.57435e-07	8.44628e-08	2.12156e-07	2.50611e-07	1.17458e-07	6.05546e-08
1715.02	4.20061e-07	2.49804e-09	1.0476e-08	-3.19641e-08	7.39524e-08			1715.02	4.20061e-07	7.39524e-08	-7.65701e-08	-3.44287e-07	-2.05403e-07	-4.1503e-07			1715.02	4.20061e-07	7.39524e-08	1.91804e-07	2.26341e-07	9.94694e-08	6.0727e-08
1714.7	3.80941e-07	-1.08077e-08	-2.8943e-09	-4.84497e-08	6.87958e-08			1714.7	3.80941e-07	6.87958e-08	-9.20826e-08	-3.51397e-07	-2.23459e-07	-4.35112e-07			1714.7	3.80941e-07	6.87958e-08	1.77375e-07	2.05328e-07	8.577e-08	6.91944e-08
1714.38	3.40906e-07	-2.12104e-08	-1.35969e-08	-6.09853e-08	6.88242e-08			1714.38	3.40906e-07	6.88242e-08	-1.03644e-07	-3.52306e-07	-2.37158e-07	-4.47216e-07			1714.38	3.40906e-07	6.88242e-08	1.70577e-07	1.88893e-07	7.69377e-08	8.46028e-08
1714.06	2.99971e-07	-2.82318e-08	-2.20274e-08	-6.98623e-08	7.31401e-08			1714.06	2.99971e-07	7.31401e-08	-1.11622e-07	-3.48934e-07	-2.46984e-07	-4.52243e-07			1714.06	2.99971e-07	7.31401e-08	1.70635e-07	1.77282e-07	7.26808e-08	1.05174e-07
1713.74	2.57278e-07	-3.20401e-08	-2.85176e-08	-7.55756e-08	8.03221e-08			1713.74	2.57278e-07	8.03221e-08	-1.16787e-07	-3.43594e-07	-2.53898e-07	-4.51771e-07			1713.74	2.57278e-07	8.03221e-08	1.74882e-07	1.68663e-07	7.20116e-08	1.27892e-07
1713.42	2.11464e-07	-3.33515e-08	-3.34413e-08	-7.86149e-08	8.87728e-08			1713.42	2.11464e-07	8.87728e-08	-1.20659e-07	-3.38688e-07	-2.58699e-07	-4.47618e-07			1713.42	2.11464e-07	8.87728e-08	1.79885e-07	1.61311e-07	7.38623e-08	1.49721e-07
1713.1	1.6082e-07	-3.31684e-08	-3.68273e-08	-7.93818e-08	9.70241e-08			1713.1	1.6082e-07	9.70241e-08	-1.24455e-07	-3.35716e-07	-2.6208e-07	-4.41519e-07			1713.1	1.6082e-07	9.70241e-08	1.82225e-07	1.53249e-07	7.67408e-08	1.67592e-07
1712.77	1.03553e-07	-3.32091e-08	-3.88623e-08	-7.8483e-08	1.03585e-07			1712.77	1.03553e-07	1.03585e-07	-1.29398e-07	-3.36151e-07	-2.64379e-07	-4.35192e-07			1712.77	1.03553e-07	1.03585e-07	1.78915e-07	1.41965e-07	7.91296e-08	1.7824e-07
1712.45	3.947e-08	-3.4383e-08	-3.93066e-08	-7.63164e-08	1.08082e-07			1712.45	3.947e-08	1.08082e-07	-1.35543e-07	-3.3967e-07	-2.65454e-07	-4.29451e-07			1712.45	3.947e-08	1.08082e-07	1.69415e-07	1.27811e-07	7.99812e-08	1.80051e-07
1712.13	-3.11562e-08	-3.75966e-08	-3.82001e-08	-7.34279e-08	1.10119e-07			1712.13	-3.11562e-08	1.10119e-07	-1.42556e-07	-3.45697e-07	-2.64888e-07	-4.24762e-07			1712.13	-3.11562e-08	1.10119e-07	1.55014e-07	1.11914e-07	7.87488e-08	1.72298e-07
1711.81	-1.05844e-07	-4.26706e-08	-3.51938e-08	-7.0035e-08	1.10203e-07			1711.81	-1.05844e-07	1.10203e-07	-1.48923e-07	-3.52406e-07	-2.61996e-07	-4.20902e-07			1711.81	-1.05844e-07	1.10203e-07	1.38484e-07	9.74178e-08	7.5569e-08	1.56226e-07
1711.49	-1.80791e-07	-4.87484e-08	-3.01616e-08	-6.62534e-08	1.09066e-07			1711.49	-1.80791e-07	1.09066e-07	-1.5288e-07	-3.57843e-07	-2.56226e-07	-4.17294e-07			1711.49	-1.80791e-07	1.09066e-07	1.23621e-07	8.82706e-08	7.12092e-08	1.3447e-07
1711.17	-2.52213e-07	-5.43662e-08	-2.33662e-08	-6.21388e-08	1.07529e-07			1711.17	-2.52213e-07	1.07529e-07	-1.52774e-07	-3.59961e-07	-2.47185e-07	-4.13231e-07			1711.17	-2.52213e-07	1.07529e-07	1.13865e-07	8.72619e-08	6.66773e-08	1.0987e-07
1710.85	-3.16949e-07	-5.81376e-08	-1.52078e-08	-5.7811e-08	1.05794e-07			1710.85	-3.16949e-07	1.05794e-07	-1.47697e-07	-3.57508e-07	-2.3502e-07	-4.08304e-07			1710.85	-3.16949e-07	1.05794e-07	1.10691e-07	9.67243e-08	6.32192e-08	8.52774e-08
1710.52	-3.72639e-07	-5.87905e-08	-6.20912e-09	-5.33609e-08	1.03837e-07			1710.52	-3.72639e-07	1.03837e-07	-1.37534e-07	-3.49816e-07	-2.20322e-07	-4.02268e-07			1710.52	-3.72639e-07	1.03837e-07	1.14279e-07	1.16888e-07	6.16018e-08	6.32315e-08
1710.2	-4.18863e-07	-5.59232e-08	2.64572e-09	-4.90475e-08	1.01165e-07			1710.2	-4.18863e-07	1.01165e-07	-1.23627e-07	-3.37632e-07	-2.04058e-07	-3.95226e-07			1710.2	-4.18863e-07	1.01165e-07	1.22373e-07	1.45185e-07	6.21832e-08	4.46382e-08
1709.88	-4.56381e-07	-4.98538e-08	1.05665e-08	-4.52842e-08	9.71392e-08			1709.88	-4.56381e-07	9.71392e-08	-1.07501e-07	-3.22131e-07	-1.87396e-07	-3.87429e-07			1709.88	-4.56381e-07	9.71392e-08	1.32206e-07	1.78274e-07	6.45878e-08	3.01263e-08
1709.56	-4.87227e-07	-4.16056e-08	1.69944e-08	-4.23817e-08	9.12599e-08			1709.56	-4.87227e-07	9.12599e-08	-9.12753e-08	-3.05088e-07	-1.71049e-07	-3.78888e-07			1709.56	-4.87227e-07	9.12599e-08	1.40668e-07	2.10782e-07	6.84109e-08	1.9832e-08
1709.24	-5.13089e-07	-3.24978e-08	2.16876e-08	-4.03617e-08	8.33952e-08			1709.24	-5.13089e-07	8.33952e-08	-7.60532e-08	-2.87965e-07	-1.55627e-07	-3.69444e-07			1709.24	-5.13089e-07	8.33952e-08	1.46156e-07	2.37585e-07	7.29493e-08	1.4031e-08
1708.92	-5.34767e-07	-2.36603e-08	2.5423e-08	-3.88386e-08	7.42309e-08			1708.92	-5.34767e-07	7.42309e-08	-6.21899e-08	-2.70968e-07	-1.41045e-07	-3.58341e-07			1708.92	-5.34767e-07	7.42309e-08	1.48607e-07	2.54417e-07	7.7962e-08	1.36486e-08
1708.6	-5.51889e-07	-1.58087e-08	2.90121e-08	-3.71216e-08	6.52863e-08			1708.6	-5.51889e-07	6.52863e-08	-4.87734e-08	-2.53689e-07	-1.26904e-07	-3.44384e-07			1708.6	-5.51889e-07	6.52863e-08	1.49601e-07	2.5909e-07	8.38395e-08	1.98845e-08
1708.27	-5.63178e-07	-9.00508e-09	3.35211e-08	-3.42341e-08	5.84555e-08			1708.27	-5.63178e-07	5.84555e-08	-3.44841e-08	-2.34987e-07	-1.12565e-07	-3.265e-07			1708.27	-5.63178e-07	5.84555e-08	1.51526e-07	2.51138e-07	9.12387e-08	3.372e-08
1707.95	-5.66211e-07	-2.61048e-09	4.03701e-08	-2.89365e-08	5.57141e-08			1707.95	-5.66211e-07	5.57141e-08	-1.74259e-08	-2.12826e-07	-9.72682e-08	-3.03348e-07			1707.95	-5.66211e-07	5.57141e-08	1.57172e-07	2.34284e-07	1.01168e-07	5.64874e-08
1707.63	-5.58975e-07	4.35813e-09	5.04023e-08	-2.02609e-08	5.8922e-08			1707.63	-5.58975e-07	5.8922e-08	3.77315e-09	-1.85868e-07	-8.05652e-08	-2.74101e-07			1707.63	-5.58975e-07	5.8922e-08	1.6835e-07	2.12501e-07	1.14708e-07	8.78701e-08
1707.31	-5.39995e-07	1.28592e-08	6.39607e-08	-7.56683e-09	6.89348e-08			1707.31	-5.39995e-07	6.89348e-08	2.87777e-08	-1.53936e-07	-6.23967e-08	-2.38723e-07			1707.31	-5.39995e-07	6.89348e-08	1.84835e-07	1.91559e-07	1.32383e-07	1.26331e-07
1706.99	-5.09122e-07	2.3766e-08	8.0802e-08	9.21611e-09	8.53361e-08			1706.99	-5.09122e-07	8.53361e-08	5.67027e-08	-1.17966e-07	-4.31988e-08	-1.98145e-07			1706.99	-5.09122e-07	8.53361e-08	2.0529e-07	1.75818e-07	1.54167e-07	1.69448e-07
1706.67	-4.66969e-07	3.72557e-08	1.00425e-07	2.99054e-08	1.06907e-07			1706.67	-4.66969e-07	1.06907e-07	8.52095e-08	-8.02229e-08	-2.37232e-08	-1.53828e-07			1706.67	-4.66969e-07	1.06907e-07	2.27051e-07	1.6813e-07	1.79229e-07	2.13575e-07
1706.35	-4.15841e-07	5.29481e-08	1.21691e-07	5.36562e-08	1.31388e-07			1706.35	-4.15841e-07	1.31388e-07	1.11287e-07	-4.38679e-08	-4.71897e-09	-1.08236e-07			1706.35	-4.15841e-07	1.31388e-07	2.47161e-07	1.68725e-07	2.05672e-07	2.54717e-07
1706.02	-3.58602e-07	6.98276e-08	1.43222e-07	7.9431e-08	1.55908e-07			1706.02	-3.58602e-07	1.55908e-07	1.32067e-07	-1.27277e-08	1.28092e-08	-6.38966e-08			1706.02	-3.58602e-07	1.55908e-07	2.62562e-07	1.75482e-07	2.31069e-07	2.88367e-07
1705.7	-2.97359e-07	8.6935e-08	1.63983e-07	1.06436e-07	1.78332e-07			1705.7	-2.97359e-07	1.78332e-07	1.45636e-07	1.11338e-08	2.87301e-08	-2.28981e-08			1705.7	-2.97359e-07	1.78332e-07	2.72442e-07	1.86404e-07	2.53403e-07	3.12112e-07
1705.38	-2.33886e-07	1.03386e-07	1.8317e-07	1.34088e-07	1.9738e-07			1705.38	-2.33886e-07	1.9738e-07	1.51559e-07	2.69345e-08	4.31662e-08	1.33692e-08			1705.38	-2.33886e-07	1.9738e-07	2.77106e-07	1.9928e-07	2.71238e-07	3.2465e-07
1705.06	-1.68615e-07	1.1866e-07	2.00476e-07	1.62135e-07	2.1314e-07			1705.06	-1.68615e-07	2.1314e-07	1.51072e-07	3.63218e-08	5.71316e-08	4.49536e-08			1705.06	-1.68615e-07	2.1314e-07	2.78821e-07	2.14656e-07	2.84134e-07	3.27093e-07
1704.74	-1.00894e-07	1.3294e-07	2.1624e-07	1.90886e-07	2.2716e-07			1704.74	-1.00894e-07	2.2716e-07	1.46918e-07	4.33226e-08	7.18962e-08	7.32035e-08			1704.74	-1.00894e-07	2.2716e-07	2.80974e-07	2.35484e-07	2.93017e-07	3.22824e-07
1704.42	-2.94795e-08	1.4683e-07	2.31637e-07	2.20978e-07	2.41961e-07			1704.42	-2.94795e-08	2.41961e-07	1.4261e-07	5.3242e-08	8.91224e-08	1.00734e-07			1704.42	-2.94795e-08	2.41961e-07	2.87742e-07	2.66491e-07	2.99977e-07	3.1687e-07
1704.1	4.76113e-08	1.61326e-07	2.48098e-07	2.53325e-07	2.60555e-07			1704.1	4.76113e-08	2.60555e-07	1.4154e-07	7.16814e-08	1.10212e-07	1.30637e-07			1704.1	4.76113e-08	2.60555e-07	3.02213e-07	3.12066e-07	3.07607e-07	3.14923e-07
1703.77	1.31332e-07	1.774e-07	2.66961e-07	2.88609e-07	2.85436e-07			1703.77	1.31332e-07	2.85436e-07	1.4632e-07	1.02915e-07	1.35854e-07	1.65709e-07			1703.77	1.31332e-07	2.85436e-07	3.26435e-07	3.74718e-07	3.18482e-07	3.21734e-07
1703.45	2.20629e-07	1.95487e-07	2.88772e-07	3.26869e-07	3.17457e-07			1703.45	2.20629e-07	3.17457e-07	1.57309e-07	1.48677e-07	1.65779e-07	2.07356e-07			1703.45	2.20629e-07	3.17457e-07	3.59424e-07	4.52232e-07	3.33782e-07	3.39494e-07
1703.13	3.13319e-07	2.15519e-07	3.13778e-07	3.67631e-07	3.56219e-07			1703.13	3.13319e-07	3.56219e-07	1.73911e-07	2.07787e-07	1.99162e-07	2.55664e-07			1703.13	3.13319e-07	3.56219e-07	3.98451e-07	5.39014e-07	3.53844e-07	3.68442e-07
1702.81	4.05363e-07	2.37149e-07	3.41296e-07	4.09984e-07	3.99976e-07			1702.81	4.05363e-07	3.99976e-07	1.94086e-07	2.76846e-07	2.345e-07	3.09051e-07			1702.81	4.05363e-07	3.99976e-07	4.39559e-07	6.26255e-07	3.77646e-07	4.061e-07
1702.49	4.91693e-07	2.59366e-07	3.70202e-07	4.52586e-07	4.45797e-07			1702.49	4.91693e-07	4.45797e-07	2.154e-07	3.50193e-07	2.70273e-07	3.64708e-07			1702.49	4.91693e-07	4.45797e-07	4.78055e-07	7.03772e-07	4.03404e-07	4.48361e-07
1702.17	5.67855e-07	2.81624e-07	3.99667e-07	4.94283e-07	4.90697e-07			1702.17	5.67855e-07	4.90697e-07	2.36211e-07	4.22512e-07	3.05385e-07	4.19556e-07			1702.17	5.67855e-07	4.90697e-07	5.10689e-07	7.62685e-07	4.29253e-07	4.90907e-07
1701.85	6.30274e-07	3.03534e-07	4.29272e-07	5.34326e-07	5.32142e-07			1701.85	6.30274e-07	5.32142e-07	2.55896e-07	4.89291e-07	3.39244e-07	4.70662e-07			1701.85	6.30274e-07	5.32142e-07	5.35054e-07	7.97238e-07	4.54184e-07	5.30159e-07
1701.52	6.77755e-07	3.25237e-07	4.59182e-07	5.72572e-07	5.68623e-07			1701.52	6.77755e-07	5.68623e-07	2.74939e-07	5.48055e-07	3.71868e-07	5.16042e-07			1701.52	6.77755e-07	5.68623e-07	5.50807e-07	8.05516e-07	4.77661e-07	5.63587e-07
1701.2	7.10214e-07	3.4734e-07	4.90048e-07	6.09293e-07	5.99546e-07			1701.2	7.10214e-07	5.99546e-07	2.94583e-07	5.97943e-07	4.0376e-07	5.54928e-07			1701.2	7.10214e-07	5.99546e-07	5.58541e-07	7.90239e-07	5.00246e-07	5.90221e-07
1700.88	7.29738e-07	3.70965e-07	5.22383e-07	6.45085e-07	6.25107e-07			1700.88	7.29738e-07	6.25107e-07	3.16384e-07	6.39401e-07	4.35502e-07	5.87587e-07			1700.88	7.29738e-07	6.25107e-07	5.60419e-07	7.56866e-07	5.23017e-07	6.10155e-07
1700.56	7.39402e-07	3.97252e-07	5.56551e-07	6.80669e-07	6.45911e-07			1700.56	7.39402e-07	6.45911e-07	3.41469e-07	6.73498e-07	4.67761e-07	6.15277e-07			1700.56	7.39402e-07	6.45911e-07	5.58219e-07	7.13012e-07	5.47204e-07	6.24367e-07
1700.24	7.42995e-07	4.27406e-07	5.92423e-07	7.16447e-07	6.62923e-07			1700.24	7.42995e-07	6.62923e-07	3.70598e-07	7.01482e-07	5.00854e-07	6.39894e-07			1700.24	7.42995e-07	6.62923e-07	5.54135e-07	6.67813e-07	5.7381e-07	6.3459e-07
1699.92	7.44254e-07	4.62279e-07	6.29194e-07	7.52309e-07	6.76825e-07			1699.92	7.44254e-07	6.76825e-07	4.03538e-07	7.23948e-07	5.34961e-07	6.63311e-07			1699.92	7.44254e-07	6.76825e-07	5.50302e-07	6.28275e-07	6.0331e-07	6.42032e-07
1699.6	7.47081e-07	5.02474e-07	6.6607e-07	7.8791e-07	6.88103e-07			1699.6	7.47081e-07	6.88103e-07	4.39733e-07	7.41485e-07	5.7018e-07	6.87313e-07			1699.6	7.47081e-07	6.88103e-07	5.48942e-07	6.0052e-07	6.35523e-07	6.48741e-07
1699.27	7.54388e-07	5.47653e-07	7.01901e-07	8.22502e-07	6.96925e-07			1699.27	7.54388e-07	6.96925e-07	4.78537e-07	7.54473e-07	6.06406e-07	7.12763e-07			1699.27	7.54388e-07	6.96925e-07	5.51516e-07	5.87719e-07	6.69526e-07	6.56452e-07
1698.95	7.68731e-07	5.97108e-07	7.36121e-07	8.55512e-07	7.03792e-07			1698.95	7.68731e-07	7.03792e-07	5.19428e-07	7.63535e-07	6.43692e-07	7.40251e-07			1698.95	7.68731e-07	7.03792e-07	5.59298e-07	5.91594e-07	7.04189e-07	6.66882e-07
1698.63	7.91427e-07	6.49786e-07	7.68516e-07	8.86469e-07	7.09433e-07			1698.63	7.91427e-07	7.09433e-07	5.62026e-07	7.70093e-07	6.82265e-07	7.6966e-07			1698.63	7.91427e-07	7.09433e-07	5.73389e-07	6.12327e-07	7.38244e-07	6.81573e-07
1698.31	8.22423e-07	7.04388e-07	7.99432e-07	9.1546e-07	7.1515e-07			1698.31	8.22423e-07	7.1515e-07	6.06403e-07	7.75915e-07	7.22404e-07	8.00861e-07			1698.31	8.22423e-07	7.1515e-07	5.9399e-07	6.49305e-07	7.71006e-07	7.01809e-07
1697.99	8.6056e-07	7.59597e-07	8.2971e-07	9.42894e-07	7.22898e-07			1697.99	8.6056e-07	7.22898e-07	6.53071e-07	7.84094e-07	7.64667e-07	8.33621e-07			1697.99	8.6056e-07	7.22898e-07	6.21266e-07	7.02165e-07	8.02251e-07	7.28679e-07
1697.67	9.03741e-07	8.14229e-07	8.59978e-07	9.69666e-07	7.35108e-07			1697.67	9.03741e-07	7.35108e-07	7.02253e-07	7.97486e-07	8.09395e-07	8.68066e-07			1697.67	9.03741e-07	7.35108e-07	6.55292e-07	7.69591e-07	8.32247e-07	7.62647e-07
1697.35	9.49219e-07	8.67143e-07	8.90762e-07	9.96431e-07	7.54001e-07			1697.35	9.49219e-07	7.54001e-07	7.53671e-07	8.18407e-07	8.56546e-07	9.04248e-07			1697.35	9.49219e-07	7.54001e-07	6.95328e-07	8.50005e-07	8.61191e-07	8.03776e-07
1697.02	9.93821e-07	9.17137e-07	9.21702e-07	1.0236e-06	7.80662e-07			1697.02	9.93821e-07	7.80662e-07	8.06197e-07	8.47215e-07	9.05236e-07	9.41843e-07			1697.02	9.93821e-07	7.80662e-07	7.40013e-07	9.39195e-07	8.89375e-07	8.50578e-07
1696.7	1.035e-06	9.63349e-07	9.51967e-07	1.05105e-06	8.15142e-07			1696.7	1.035e-06	8.15142e-07	8.57601e-07	8.8315e-07	9.54143e-07	9.80079e-07			1696.7	1.035e-06	8.15142e-07	7.88371e-07	1.03127e-06	9.16618e-07	9.0136e-07
1696.38	1.07084e-06	1.00467e-06	9.79963e-07	1.07806e-06	8.55824e-07			1696.38	1.07084e-06	8.55824e-07	9.04898e-07	9.23108e-07	1.00111e-06	1.01742e-06			1696.38	1.07084e-06	8.55824e-07	8.37317e-07	1.11786e-06	9.42176e-07	9.53052e-07
1696.06	1.09989e-06	1.04031e-06	1.00408e-06	1.1036e-06	8.99581e-07			1696.06	1.09989e-06	8.99581e-07	9.45074e-07	9.63542e-07	1.04364e-06	1.05176e-06			1696.06	1.09989e-06	8.99581e-07	8.83857e-07	1.18962e-06	9.64978e-07	1.00168e-06
1695.74	1.12114e-06	1.06939e-06	1.0227e-06	1.12642e-06	9.42445e-07			1695.74	1.12114e-06	9.42445e-07	9.75134e-07	9.99817e-07	1.07951e-06	1.0807e-06			1695.74	1.12114e-06	9.42445e-07	9.24208e-07	1.23775e-06	9.83723e-07	1.04318e-06
1695.42	1.13397e-06	1.0916e-06	1.03505e-06	1.14557e-06	9.80639e-07			1695.42	1.13397e-06	9.80639e-07	9.93345e-07	1.02826e-06	1.10701e-06	1.10217e-06			1695.42	1.13397e-06	9.80639e-07	9.55094e-07	1.2563e-06	9.97615e-07	1.07382e-06
1695.1	1.13844e-06	1.10709e-06	1.04141e-06	1.16097e-06	1.01123e-06			1695.1	1.13844e-06	1.01123e-06	9.99668e-07	1.04731e-06	1.12553e-06	1.11521e-06			1695.1	1.13844e-06	1.01123e-06	9.74354e-07	1.24397e-06	1.00689e-06	1.09114e-06
1694.78	1.135e-06	1.11649e-06	1.04327e-06	1.17302e-06	1.03292e-06			1694.78	1.135e-06	1.03292e-06	9.9566e-07	1.05689e-06	1.13572e-06	1.12009e-06			1694.78	1.135e-06	1.03292e-06	9.81961e-07	1.20493e-06	1.01226e-06	1.09481e-06
1694.45	1.12509e-06	1.12106e-06	1.04311e-06	1.18291e-06	1.04615e-06			1694.45	1.12509e-06	1.04615e-06	9.84061e-07	1.05948e-06	1.13899e-06	1.11828e-06			1694.45	1.12509e-06	1.04615e-06	9.79612e-07	1.14623e-06	1.01537e-06	1.08649e-06
1694.13	1.1116e-06	1.12238e-06	1.0439e-06	1.19238e-06	1.05301e-06			1694.13	1.1116e-06	1.05301e-06	9.69011e-07	1.05853e-06	1.13747e-06	1.11263e-06			1694.13	1.1116e-06	1.05301e-06	9.70795e-07	1.07938e-06	1.01871e-06	1.07006e-06
1693.81	1.09787e-06	1.12227e-06	1.04827e-06	1.20327e-06	1.05643e-06			1693.81	1.09787e-06	1.05643e-06	9.54496e-07	1.05768e-06	1.13347e-06	1.10664e-06			1693.81	1.09787e-06	1.05643e-06	9.60468e-07	1.01573e-06	1.02464e-06	1.05061e-06
1693.49	1.08807e-06	1.12273e-06	1.05852e-06	1.21718e-06	1.05988e-06			1693.49	1.08807e-06	1.05988e-06	9.44589e-07	1.06038e-06	1.12921e-06	1.1038e-06			1693.49	1.08807e-06	1.05988e-06	9.54277e-07	9.65939e-07	1.03568e-06	1.03394e-06
1693.17	1.08635e-06	1.12559e-06	1.0756e-06	1.23533e-06	1.06631e-06			1693.17	1.08635e-06	1.06631e-06	9.42349e-07	1.06861e-06	1.12663e-06	1.10707e-06			1693.17	1.08635e-06	1.06631e-06	9.57054e-07	9.37622e-07	1.05361e-06	1.02524e-06
1692.85	1.09588e-06	1.13231e-06	1.09989e-06	1.25816e-06	1.0781e-06			1692.85	1.09588e-06	1.0781e-06	9.49955e-07	1.08346e-06	1.12731e-06	1.11861e-06			1692.85	1.09588e-06	1.0781e-06	9.72348e-07	9.35637e-07	1.07951e-06	1.0285e-06
1692.53	1.11914e-06	1.14405e-06	1.13095e-06	1.2856e-06	1.09693e-06			1692.53	1.11914e-06	1.09693e-06	9.68625e-07	1.10546e-06	1.13262e-06	1.13923e-06			1692.53	1.11914e-06	1.09693e-06	1.00274e-06	9.61259e-07	1.11367e-06	1.04629e-06
1692.2	1.15666e-06	1.1615e-06	1.16787e-06	1.31709e-06	1.12302e-06			1692.2	1.15666e-06	1.12302e-06	9.98144e-07	1.13399e-06	1.14337e-06	1.16876e-06			1692.2	1.15666e-06	1.12302e-06	1.04849e-06	1.012e-06	1.15526e-06	1.07872e-06
1691.88	1.20753e-06	1.18502e-06	1.20974e-06	1.35164e-06	1.15613e-06			1691.88	1.20753e-06	1.15613e-06	1.03726e-06	1.16865e-06	1.16008e-06	1.20574e-06			1691.88	1.20753e-06	1.15613e-06	1.10784e-06	1.08432e-06	1.20282e-06	1.12468e-06
1691.56	1.26894e-06	1.21433e-06	1.2556e-06	1.38837e-06	1.19557e-06			1691.56	1.26894e-06	1.19557e-06	1.08382e-06	1.20843e-06	1.18275e-06	1.24798e-06			1691.56	1.26894e-06	1.19557e-06	1.17681e-06	1.1725e-06	1.25425e-06	1.1814e-06
1691.24	1.33746e-06	1.24933e-06	1.30485e-06	1.42639e-06	1.24032e-06			1691.24	1.33746e-06	1.24032e-06	1.13508e-06	1.25218e-06	1.21102e-06	1.29303e-06			1691.24	1.33746e-06	1.24032e-06	1.25142e-06	1.27151e-06	1.30759e-06	1.24589e-06
1690.92	1.40968e-06	1.28987e-06	1.35716e-06	1.46512e-06	1.28953e-06			1690.92	1.40968e-06	1.28953e-06	1.18856e-06	1.29924e-06	1.24426e-06	1.33866e-06			1690.92	1.40968e-06	1.28953e-06	1.32736e-06	1.37665e-06	1.36113e-06	1.31517e-06
1690.6	1.48145e-06	1.33533e-06	1.41197e-06	1.50414e-06	1.34212e-06			1690.6	1.48145e-06	1.34212e-06	1.24193e-06	1.34788e-06	1.28141e-06	1.38292e-06			1690.6	1.48145e-06	1.34212e-06	1.40039e-06	1.48286e-06	1.41356e-06	1.38648e-06
1690.28	1.54969e-06	1.38536e-06	1.46863e-06	1.54321e-06	1.3972e-06			1690.28	1.54969e-06	1.3972e-06	1.29366e-06	1.39714e-06	1.32156e-06	1.42449e-06			1690.28	1.54969e-06	1.3972e-06	1.46787e-06	1.58614e-06	1.46424e-06	1.45782e-06
1689.95	1.61233e-06	1.43945e-06	1.52608e-06	1.58247e-06	1.45431e-06			1689.95	1.61233e-06	1.45431e-06	1.34296e-06	1.4454e-06	1.36367e-06	1.46302e-06			1689.95	1.61233e-06	1.45431e-06	1.52866e-06	1.68294e-06	1.51313e-06	1.52801e-06
1689.63	1.66897e-06	1.49731e-06	1.58352e-06	1.62224e-06	1.51288e-06			1689.63	1.66897e-06	1.51288e-06	1.38993e-06	1.49194e-06	1.40741e-06	1.49897e-06			1689.63	1.66897e-06	1.51288e-06	1.58277e-06	1.77155e-06	1.56093e-06	1.59682e-06
1689.31	1.71957e-06	1.55848e-06	1.63961e-06	1.66289e-06	1.57191e-06			1689.31	1.71957e-06	1.57191e-06	1.43507e-06	1.53623e-06	1.45263e-06	1.53331e-06			1689.31	1.71957e-06	1.57191e-06	1.63114e-06	1.84908e-06	1.60841e-06	1.6641e-06
1688.99	1.76712e-06	1.62328e-06	1.69417e-06	1.70541e-06	1.63141e-06			1688.99	1.76712e-06	1.63141e-06	1.48018e-06	1.57983e-06	1.49999e-06	1.56827e-06			1688.99	1.76712e-06	1.63141e-06	1.67626e-06	1.91637e-06	1.65717e-06	1.7313e-06
1688.67	1.81433e-06	1.69169e-06	1.74747e-06	1.75075e-06	1.6911e-06			1688.67	1.81433e-06	1.6911e-06	1.52709e-06	1.62412e-06	1.55031e-06	1.60608e-06			1688.67	1.81433e-06	1.6911e-06	1.7202e-06	1.97462e-06	1.70861e-06	1.7991e-06
1688.35	1.86442e-06	1.76405e-06	1.80028e-06	1.79982e-06	1.75114e-06			1688.35	1.86442e-06	1.75114e-06	1.57796e-06	1.67146e-06	1.60457e-06	1.6492e-06			1688.35	1.86442e-06	1.75114e-06	1.76545e-06	2.02676e-06	1.76438e-06	1.86866e-06
1688.03	1.92031e-06	1.8406e-06	1.85393e-06	1.85334e-06	1.81205e-06			1688.03	1.92031e-06	1.81205e-06	1.6347e-06	1.72417e-06	1.66377e-06	1.69956e-06			1688.03	1.92031e-06	1.81205e-06	1.81441e-06	2.0771e-06	1.82578e-06	1.94112e-06
1687.7	1.98383e-06	1.92145e-06	1.90998e-06	1.91153e-06	1.87454e-06			1687.7	1.98383e-06	1.87454e-06	1.69899e-06	1.78442e-06	1.72872e-06	1.75858e-06			1687.7	1.98383e-06	1.87454e-06	1.86945e-06	2.12968e-06	1.89377e-06	2.017e-06
1687.38	2.05601e-06	2.00649e-06	1.96989e-06	1.97426e-06	1.93971e-06			1687.38	2.05601e-06	1.93971e-06	1.77201e-06	1.8538e-06	1.80014e-06	1.82688e-06			1687.38	2.05601e-06	1.93971e-06	1.93302e-06	2.18873e-06	1.96908e-06	2.09697e-06
1687.06	2.13627e-06	2.09542e-06	2.03461e-06	2.04077e-06	2.00835e-06			1687.06	2.13627e-06	2.00835e-06	1.85424e-06	1.93253e-06	1.87833e-06	1.90395e-06			1687.06	2.13627e-06	2.00835e-06	2.00693e-06	2.25737e-06	2.05138e-06	2.18111e-06
1686.74	2.22361e-06	2.18772e-06	2.10419e-06	2.10996e-06	2.08076e-06			1686.74	2.22361e-06	2.08076e-06	1.94553e-06	2.01966e-06	1.96302e-06	1.98827e-06			1686.74	2.22361e-06	2.08076e-06	2.0919e-06	2.33562e-06	2.13988e-06	2.26816e-06
1686.42	2.31658e-06	2.28287e-06	2.17801e-06	2.18058e-06	2.15652e-06			1686.42	2.31658e-06	2.15652e-06	2.04544e-06	2.11307e-06	2.0539e-06	2.0779e-06			1686.42	2.31658e-06	2.15652e-06	2.18763e-06	2.42338e-06	2.23278e-06	2.35651e-06
1686.1	2.41281e-06	2.38037e-06	2.25521e-06	2.25126e-06	2.23446e-06			1686.1	2.41281e-06	2.23446e-06	2.1525e-06	2.21019e-06	2.15036e-06	2.17022e-06			1686.1	2.41281e-06	2.23446e-06	2.29232e-06	2.51773e-06	2.32762e-06	2.44369e-06
1685.78	2.51025e-06	2.47962e-06	2.3346e-06	2.3207e-06	2.31298e-06			1685.78	2.51025e-06	2.31298e-06	2.265e-06	2.30795e-06	2.25153e-06	2.26241e-06			1685.78	2.51025e-06	2.31298e-06	2.40253e-06	2.61425e-06	2.42133e-06	2.52661e-06
1685.45	2.60709e-06	2.58008e-06	2.41529e-06	2.38788e-06	2.39023e-06			1685.45	2.60709e-06	2.39023e-06	2.38118e-06	2.40407e-06	2.35675e-06	2.35208e-06			1685.45	2.60709e-06	2.39023e-06	2.51447e-06	2.70917e-06	2.51111e-06	2.60271e-06
1685.13	2.70133e-06	2.68134e-06	2.4967e-06	2.45181e-06	2.46443e-06			1685.13	2.70133e-06	2.46443e-06	2.49935e-06	2.49723e-06	2.46546e-06	2.43728e-06			1685.13	2.70133e-06	2.46443e-06	2.62428e-06	2.7984e-06	2.59424e-06	2.66966e-06
1684.81	2.79166e-06	2.78303e-06	2.5785e-06	2.51179e-06	2.53416e-06			1684.81	2.79166e-06	2.53416e-06	2.61812e-06	2.58726e-06	2.57714e-06	2.51687e-06			1684.81	2.79166e-06	2.53416e-06	2.72914e-06	2.87943e-06	2.66898e-06	2.72651e-06
1684.49	2.87693e-06	2.88467e-06	2.66034e-06	2.56706e-06	2.59825e-06			1684.49	2.87693e-06	2.59825e-06	2.73654e-06	2.67485e-06	2.69139e-06	2.59035e-06			1684.49	2.87693e-06	2.59825e-06	2.82732e-06	2.95007e-06	2.73445e-06	2.77287e-06
1684.17	2.95645e-06	2.98562e-06	2.74188e-06	2.61665e-06	2.65583e-06			1684.17	2.95645e-06	2.65583e-06	2.85429e-06	2.76112e-06	2.80763e-06	2.65757e-06			1684.17	2.95645e-06	2.65583e-06	2.91861e-06	3.01054e-06	2.79068e-06	2.80937e-06
1683.85	3.02936e-06	3.08487e-06	2.82216e-06	2.65945e-06	2.70608e-06			1683.85	3.02936e-06	2.70608e-06	2.97142e-06	2.84678e-06	2.92499e-06	2.71834e-06			1683.85	3.02936e-06	2.70608e-06	3.00317e-06	3.06101e-06	2.8383e-06	2.83677e-06
1683.53	3.09463e-06	3.18106e-06	2.8996e-06	2.69382e-06	2.74706e-06			1683.53	3.09463e-06	2.74706e-06	3.08779e-06	2.9308e-06	3.04189e-06	2.77189e-06			1683.53	3.09463e-06	2.74706e-06	3.08115e-06	3.1011e-06	2.87799e-06	2.85522e-06
1683.2	3.15094e-06	3.27234e-06	2.97201e-06	2.71816e-06	2.77702e-06			1683.2	3.15094e-06	2.77702e-06	3.20323e-06	3.01129e-06	3.1564e-06	2.81718e-06			1683.2	3.15094e-06	2.77702e-06	3.15177e-06	3.12967e-06	2.91016e-06	2.86449e-06
1682.88	3.19587e-06	3.35616e-06	3.03637e-06	2.73073e-06	2.7937e-06			1682.88	3.19587e-06	2.7937e-06	3.3164e-06	3.08422e-06	3.26601e-06	2.85256e-06			1682.88	3.19587e-06	2.7937e-06	3.21296e-06	3.14438e-06	2.93456e-06	2.86353e-06
1682.56	3.22713e-06	3.43013e-06	3.08941e-06	2.73013e-06	2.7952e-06			1682.56	3.22713e-06	2.7952e-06	3.42551e-06	3.14566e-06	3.36827e-06	2.87636e-06			1682.56	3.22713e-06	2.7952e-06	3.26241e-06	3.14392e-06	2.95051e-06	2.85145e-06
1682.24	3.24257e-06	3.49152e-06	3.12761e-06	2.71532e-06	2.77993e-06			1682.24	3.24257e-06	2.77993e-06	3.52777e-06	3.19125e-06	3.46029e-06	2.88723e-06			1682.24	3.24257e-06	2.77993e-06	3.29731e-06	3.12658e-06	2.95688e-06	2.82762e-06
1681.92	3.24135e-06	3.53784e-06	3.14829e-06	2.68584e-06	2.74723e-06			1681.92	3.24135e-06	2.74723e-06	3.6203e-06	3.21851e-06	3.53957e-06	2.88457e-06			1681.92	3.24135e-06	2.74723e-06	3.31621e-06	3.09291e-06	2.95289e-06	2.7927e-06
1681.6	3.22276e-06	3.5665e-06	3.14874e-06	2.64132e-06	2.69695e-06			1681.6	3.22276e-06	2.69695e-06	3.69959e-06	3.22501e-06	3.60306e-06	2.86826e-06			1681.6	3.22276e-06	2.69695e-06	3.31786e-06	3.04252e-06	2.93753e-06	2.74708e-06
1681.28	3.18881e-06	3.57554e-06	3.12765e-06	2.58201e-06	2.63018e-06			1681.28	3.18881e-06	2.63018e-06	3.76287e-06	3.21043e-06	3.6481e-06	2.83929e-06			1681.28	3.18881e-06	2.63018e-06	3.30329e-06	2.97956e-06	2.91098e-06	2.69268e-06
1680.95	3.14059e-06	3.56272e-06	3.08443e-06	2.50812e-06	2.54843e-06			1680.95	3.14059e-06	2.54843e-06	3.80708e-06	3.17454e-06	3.672e-06	2.79839e-06			1680.95	3.14059e-06	2.54843e-06	3.27397e-06	2.90575e-06	2.87374e-06	2.63024e-06
1680.63	3.08135e-06	3.52681e-06	3.01979e-06	2.42025e-06	2.45414e-06			1680.63	3.08135e-06	2.45414e-06	3.83055e-06	3.11882e-06	3.67281e-06	2.74738e-06			1680.63	3.08135e-06	2.45414e-06	3.23199e-06	2.82504e-06	2.8272e-06	2.56157e-06
1680.31	3.01367e-06	3.4669e-06	2.93525e-06	2.31926e-06	2.34961e-06			1680.31	3.01367e-06	2.34961e-06	3.8321e-06	3.04528e-06	3.64958e-06	2.6878e-06			1680.31	3.01367e-06	2.34961e-06	3.17971e-06	2.74064e-06	2.77317e-06	2.4872e-06
1679.99	2.93961e-06	3.38287e-06	2.83296e-06	2.20627e-06	2.2377e-06			1679.99	2.93961e-06	2.2377e-06	3.81164e-06	2.9562e-06	3.60245e-06	2.62154e-06			1679.99	2.93961e-06	2.2377e-06	3.11892e-06	2.65524e-06	2.71358e-06	2.40817e-06
1679.67	2.86128e-06	3.27504e-06	2.71541e-06	2.08255e-06	2.12122e-06			1679.67	2.86128e-06	2.12122e-06	3.76987e-06	2.85439e-06	3.53241e-06	2.55027e-06			1679.67	2.86128e-06	2.12122e-06	3.05068e-06	2.57182e-06	2.64986e-06	2.32549e-06
1679.35	2.77906e-06	3.14387e-06	2.58465e-06	1.94922e-06	2.0021e-06			1679.35	2.77906e-06	2.0021e-06	3.70745e-06	2.74212e-06	3.44097e-06	2.47525e-06			1679.35	2.77906e-06	2.0021e-06	2.97484e-06	2.49234e-06	2.58191e-06	2.23926e-06
1679.03	2.69274e-06	2.98985e-06	2.44213e-06	1.80701e-06	1.88219e-06			1679.03	2.69274e-06	1.88219e-06	3.62462e-06	2.62145e-06	3.32951e-06	2.39699e-06			1679.03	2.69274e-06	1.88219e-06	2.8907e-06	2.41689e-06	2.5082e-06	2.14967e-06
1678.7	2.60106e-06	2.81293e-06	2.28898e-06	1.65627e-06	1.76256e-06			1678.7	2.60106e-06	1.76256e-06	3.52078e-06	2.49377e-06	3.19865e-06	2.31524e-06			1678.7	2.60106e-06	1.76256e-06	2.79688e-06	2.34566e-06	2.42548e-06	2.05688e-06
1678.38	2.50103e-06	2.61255e-06	2.12513e-06	1.49658e-06	1.64305e-06			1678.38	2.50103e-06	1.64305e-06	3.39355e-06	2.35859e-06	3.04736e-06	2.22819e-06			1678.38	2.50103e-06	1.64305e-06	2.69024e-06	2.2748e-06	2.32898e-06	1.95924e-06
1678.06	2.38849e-06	2.38742e-06	1.94922e-06	1.32693e-06	1.52302e-06			1678.06	2.38849e-06	1.52302e-06	3.23959e-06	2.21387e-06	2.87314e-06	2.13301e-06			1678.06	2.38849e-06	1.52302e-06	2.56701e-06	2.19882e-06	2.21307e-06	1.85442e-06
1677.74	2.25763e-06	2.13582e-06	1.75911e-06	1.14603e-06	1.40076e-06			1677.74	2.25763e-06	1.40076e-06	3.05417e-06	2.05653e-06	2.67262e-06	2.02589e-06			1677.74	2.25763e-06	1.40076e-06	2.42253e-06	2.10965e-06	2.07194e-06	1.73882e-06
1677.42	2.10083e-06	1.8559e-06	1.55135e-06	9.52129e-07	1.27317e-06			1677.42	2.10083e-06	1.27317e-06	2.83163e-06	1.88178e-06	2.44143e-06	1.90211e-06			1677.42	2.10083e-06	1.27317e-06	2.25037e-06	1.99745e-06	1.8998e-06	1.60754e-06
1677.1	1.91031e-06	1.54563e-06	1.32179e-06	7.43431e-07	1.13645e-06			1677.1	1.91031e-06	1.13645e-06	2.56622e-06	1.68431e-06	2.17529e-06	1.75663e-06			1677.1	1.91031e-06	1.13645e-06	2.04363e-06	1.85083e-06	1.69189e-06	1.45532e-06
1676.78	1.67851e-06	1.20324e-06	1.06589e-06	5.18053e-07	9.85599e-07			1676.78	1.67851e-06	9.85599e-07	2.25251e-06	1.45862e-06	1.87062e-06	1.58428e-06			1676.78	1.67851e-06	9.85599e-07	1.79466e-06	1.65893e-06	1.4442e-06	1.27656e-06
1676.45	1.3977e-06	8.27453e-07	7.79313e-07	2.74069e-07	8.14845e-07			1676.45	1.3977e-06	8.14845e-07	1.88567e-06	1.19917e-06	1.52457e-06	1.37979e-06			1676.45	1.3977e-06	8.14845e-07	1.49541e-06	1.4134e-06	1.15363e-06	1.06586e-06
1676.13	1.06322e-06	4.18643e-07	4.59181e-07	1.00553e-08	6.18852e-07			1676.13	1.06322e-06	6.18852e-07	1.46268e-06	9.02206e-07	1.13639e-06	1.13854e-06			1676.13	1.06322e-06	6.18852e-07	1.13944e-06	1.10731e-06	8.18882e-07	8.19329e-07
1675.81	6.73084e-07	-2.17052e-08	1.04213e-07	-2.74785e-07	3.92619e-07			1675.81	6.73084e-07	3.92619e-07	9.82511e-07	5.64399e-07	7.06905e-07	8.57183e-07			1675.81	6.73084e-07	3.92619e-07	7.22726e-07	7.36853e-07	4.39994e-07	5.33972e-07
1675.49	2.28764e-07	-4.8991e-07	-2.84528e-07	-5.80078e-07	1.33195e-07			1675.49	2.28764e-07	1.33195e-07	4.46961e-07	1.84832e-07	2.39191e-07	5.33931e-07			1675.49	2.28764e-07	1.33195e-07	2.44333e-07	3.02694e-07	1.89013e-08	2.09004e-07
1675.17	-2.63518e-07	-9.79713e-07	-7.02791e-07	-9.04097e-07	-1.60214e-07			1675.17	-2.63518e-07	-1.60214e-07	-1.38511e-07	-2.35318e-07	-2.61021e-07	1.69461e-07			1675.17	-2.63518e-07	-1.60214e-07	-2.91424e-07	-1.90098e-07	-4.39689e-07	-1.53812e-07
1674.85	-7.93487e-07	-1.48221e-06	-1.14338e-06	-1.24337e-06	-4.85555e-07			1674.85	-7.93487e-07	-4.85555e-07	-7.64771e-07	-6.91682e-07	-7.85604e-07	-2.32897e-07			1674.85	-7.93487e-07	-4.85555e-07	-8.75363e-07	-7.32512e-07	-9.2824e-07	-5.50251e-07
1674.53	-1.34785e-06	-1.98642e-06	-1.59636e-06	-1.59265e-06	-8.38292e-07			1674.53	-1.34785e-06	-8.38292e-07	-1.41864e-06	-1.17723e-06	-1.32391e-06	-6.66756e-07			1674.53	-1.34785e-06	-8.38292e-07	-1.49353e-06	-1.31263e-06	-1.43603e-06	-9.73461e-07
1674.21	-1.90879e-06	-2.47886e-06	-2.04869e-06	-1.94458e-06	-1.2104e-06			1674.21	-1.90879e-06	-1.2104e-06	-2.08256e-06	-1.68129e-06	-1.86258e-06	-1.12227e-06			1674.21	-1.90879e-06	-1.2104e-06	-2.12672e-06	-1.91271e-06	-1.94905e-06	-1.41325e-06
1673.88	-2.4586e-06	-2.94486e-06	-2.48633e-06	-2.29046e-06	-1.59238e-06			1673.88	-2.4586e-06	-1.59238e-06	-2.73676e-06	-2.19062e-06	-2.38638e-06	-1.58705e-06			1673.88	-2.4586e-06	-1.59238e-06	-2.75368e-06	-2.5134e-06	-2.45132e-06	-1.85787e-06
1673.56	-2.97776e-06	-3.36918e-06	-2.89411e-06	-2.62023e-06	-1.9727e-06			1673.56	-2.97776e-06	-1.9727e-06	-3.35904e-06	-2.68917e-06	-2.87851e-06	-2.04619e-06			1673.56	-2.97776e-06	-1.9727e-06	-3.35083e-06	-3.09166e-06	-2.92465e-06	-2.29264e-06
1673.24	-3.44773e-06	-3.73694e-06	-3.25685e-06	-2.92333e-06	-2.33876e-06			1673.24	-3.44773e-06	-2.33876e-06	-3.92691e-06	-3.15901e-06	-3.32201e-06	-2.48373e-06			1673.24	-3.44773e-06	-2.33876e-06	-3.89428e-06	-3.62374e-06	-3.35078e-06	-2.70241e-06
1672.92	-3.85096e-06	-4.03452e-06	-3.56135e-06	-3.18969e-06	-2.67811e-06			1672.92	-3.85096e-06	-2.67811e-06	-4.41858e-06	-3.58165e-06	-3.70053e-06	-2.88362e-06			1672.92	-3.85096e-06	-2.67811e-06	-4.36222e-06	-4.08453e-06	-3.71264e-06	-3.071e-06
1672.6	-4.17264e-06	-4.25147e-06	-3.79702e-06	-3.4108e-06	-2.97943e-06			1672.6	-4.17264e-06	-2.97943e-06	-4.81525e-06	-3.94008e-06	-4.00044e-06	-3.2316e-06			1672.6	-4.17264e-06	-2.97943e-06	-4.73569e-06	-4.45192e-06	-3.99608e-06	-3.38432e-06
1672.28	-4.4011e-06	-4.38068e-06	-3.95671e-06	-3.58062e-06	-3.23308e-06			1672.28	-4.4011e-06	-3.23308e-06	-5.10227e-06	-4.22064e-06	-4.21176e-06	-3.51625e-06			1672.28	-4.4011e-06	-3.23308e-06	-5.00042e-06	-4.7081e-06	-4.19106e-06	-3.63007e-06
1671.96	-4.52802e-06	-4.41953e-06	-4.03733e-06	-3.69609e-06	-3.43202e-06			1671.96	-4.52802e-06	-3.43202e-06	-5.27037e-06	-4.41398e-06	-4.32941e-06	-3.73016e-06			1671.96	-4.52802e-06	-3.43202e-06	-5.14664e-06	-4.84116e-06	-4.29263e-06	-3.80012e-06
1671.63	-4.55044e-06	-4.37007e-06	-4.03983e-06	-3.75733e-06	-3.57257e-06			1671.63	-4.55044e-06	-3.57257e-06	-5.31675e-06	-4.51621e-06	-4.35332e-06	-3.87054e-06			1671.63	-4.55044e-06	-3.57257e-06	-5.17106e-06	-4.84866e-06	-4.30104e-06	-3.89093e-06
1671.31	-4.46948e-06	-4.23856e-06	-3.96863e-06	-3.76747e-06	-3.65377e-06			1671.31	-4.46948e-06	-3.65377e-06	-5.24441e-06	-4.52852e-06	-4.28864e-06	-3.93892e-06			1671.31	-4.46948e-06	-3.65377e-06	-5.07561e-06	-4.73561e-06	-4.22155e-06	-3.90331e-06
1670.99	-4.2924e-06	-4.03519e-06	-3.83138e-06	-3.732e-06	-3.67839e-06			1670.99	-4.2924e-06	-3.67839e-06	-5.06251e-06	-4.4578e-06	-4.14495e-06	-3.94089e-06			1670.99	-4.2924e-06	-3.67839e-06	-4.86896e-06	-4.51469e-06	-4.06359e-06	-3.8428e-06
1670.67	-4.0306e-06	-3.77267e-06	-3.63815e-06	-3.65797e-06	-3.65147e-06			1670.67	-4.0306e-06	-3.65147e-06	-4.78449e-06	-4.31438e-06	-3.93479e-06	-3.88492e-06			1670.67	-4.0306e-06	-3.65147e-06	-4.56465e-06	-4.20483e-06	-3.8391e-06	-3.71818e-06
1670.35	-3.69941e-06	-3.46564e-06	-3.40101e-06	-3.55341e-06	-3.58046e-06			1670.35	-3.69941e-06	-3.58046e-06	-4.42741e-06	-4.11158e-06	-3.67268e-06	-3.78119e-06			1670.35	-3.69941e-06	-3.58046e-06	-4.18027e-06	-3.82781e-06	-3.56208e-06	-3.54085e-06
1670.03	-3.31617e-06	-3.12897e-06	-3.13261e-06	-3.42618e-06	-3.47357e-06			1670.03	-3.31617e-06	-3.47357e-06	-4.00978e-06	-3.86282e-06	-3.37301e-06	-3.64055e-06			1670.03	-3.31617e-06	-3.47357e-06	-3.73575e-06	-3.40404e-06	-3.24674e-06	-3.32287e-06
1669.71	-2.89893e-06	-2.77722e-06	-2.846e-06	-3.28406e-06	-3.33995e-06			1669.71	-2.89893e-06	-3.33995e-06	-3.55051e-06	-3.58174e-06	-3.04995e-06	-3.47386e-06			1669.71	-2.89893e-06	-3.33995e-06	-3.25227e-06	-2.95354e-06	-2.90711e-06	-3.07681e-06
1669.38	-2.46429e-06	-2.4236e-06	-2.55347e-06	-3.13374e-06	-3.18826e-06			1669.38	-2.46429e-06	-3.18826e-06	-3.0678e-06	-3.2807e-06	-2.71592e-06	-3.29098e-06			1669.38	-2.46429e-06	-3.18826e-06	-2.75023e-06	-2.49267e-06	-2.55609e-06	-2.81406e-06
1669.06	-2.02687e-06	-2.07918e-06	-2.26536e-06	-2.98053e-06	-3.02624e-06			1669.06	-2.02687e-06	-3.02624e-06	-2.57776e-06	-2.96985e-06	-2.38128e-06	-3.10012e-06			1669.06	-2.02687e-06	-3.02624e-06	-2.2471e-06	-2.03419e-06	-2.20495e-06	-2.54499e-06
1668.74	-1.59903e-06	-1.75287e-06	-1.98994e-06	-2.82824e-06	-2.85988e-06			1668.74	-1.59903e-06	-2.85988e-06	-2.09459e-06	-2.6582e-06	-2.05435e-06	-2.90816e-06			1668.74	-1.59903e-06	-2.85988e-06	-1.75757e-06	-1.58958e-06	-1.86293e-06	-2.27924e-06
1668.42	-1.18883e-06	-1.45055e-06	-1.73244e-06	-2.67876e-06	-2.6934e-06			1668.42	-1.18883e-06	-2.6934e-06	-1.62922e-06	-2.35212e-06	-1.74109e-06	-2.71936e-06			1668.42	-1.18883e-06	-2.6934e-06	-1.29186e-06	-1.1679e-06	-1.53663e-06	-2.02411e-06
1668.1	-8.03439e-07	-1.17647e-06	-1.49595e-06	-2.53227e-06	-2.52962e-06			1668.1	-8.03439e-07	-2.52962e-06	-1.19041e-06	-2.05739e-06	-1.44595e-06	-2.53644e-06			1668.1	-8.03439e-07	-2.52962e-06	-8.5738e-07	-7.78346e-07	-1.23102e-06	-1.78639e-06
1667.78	-4.47242e-07	-9.32042e-07	-1.28069e-06	-2.38719e-06	-2.36912e-06			1667.78	-4.47242e-07	-2.36912e-06	-7.8389e-07	-1.77699e-06	-1.17143e-06	-2.35988e-06			1667.78	-4.47242e-07	-2.36912e-06	-4.58314e-07	-4.27833e-07	-9.48671e-07	-1.57014e-06
1667.46	-1.22952e-07	-7.16993e-07	-1.08482e-06	-2.24057e-06	-2.21077e-06			1667.46	-1.22952e-07	-2.21077e-06	-4.12376e-07	-1.51179e-06	-9.18346e-07	-2.18815e-06			1667.46	-1.22952e-07	-2.21077e-06	-9.50715e-08	-1.19815e-07	-6.89945e-07	-1.3767e-06
1667.13	1.67556e-07	-5.30038e-07	-9.05688e-07	-2.08902e-06	-2.05244e-06			1667.13	1.67556e-07	-2.05244e-06	-7.67272e-08	-1.26091e-06	-6.86602e-07	-2.01846e-06			1667.13	1.67556e-07	-2.05244e-06	2.32823e-07	1.4528e-07	-4.54203e-07	-1.20537e-06
1666.81	4.23281e-07	-3.69385e-07	-7.40466e-07	-1.92899e-06	-1.89136e-06			1666.81	4.23281e-07	-1.89136e-06	2.24159e-07	-1.02166e-06	-4.75343e-07	-1.84724e-06			1666.81	4.23281e-07	-1.89136e-06	5.27611e-07	3.7164e-07	-2.40317e-07	-1.05306e-06
1666.49	6.44291e-07	-2.33387e-07	-5.87008e-07	-1.75792e-06	-1.72484e-06			1666.49	6.44291e-07	-1.72484e-06	4.92212e-07	-7.9101e-07	-2.84034e-07	-1.67118e-06			1666.49	6.44291e-07	-1.72484e-06	7.90989e-07	5.67435e-07	-4.78246e-08	-9.15586e-07
1666.17	8.29446e-07	-1.21497e-07	-4.45405e-07	-1.57525e-06	-1.55191e-06			1666.17	8.29446e-07	-1.55191e-06	7.28393e-07	-5.6721e-07	-1.13317e-07	-1.48862e-06			1666.17	8.29446e-07	-1.55191e-06	1.0235e-06	7.40885e-07	1.22082e-07	-7.89688e-07
1665.85	9.78971e-07	-3.43409e-08	-3.17375e-07	-1.38247e-06	-1.37297e-06			1665.85	9.78971e-07	-1.37297e-06	9.33102e-07	-3.50463e-07	3.4812e-08	-1.29991e-06			1665.85	9.78971e-07	-1.37297e-06	1.2245e-06	9.00052e-07	2.66648e-07	-6.7293e-07
1665.53	1.092e-06	2.57493e-08	-2.0694e-07	-1.18383e-06	-1.19114e-06			1665.53	1.092e-06	-1.19114e-06	1.1046e-06	-1.44777e-07	1.55959e-07	-1.10865e-06			1665.53	1.092e-06	-1.19114e-06	1.39121e-06	1.04784e-06	3.80447e-07	-5.66601e-07
1665.21	1.16711e-06	5.50627e-08	-1.20243e-07	-9.86068e-07	-1.01233e-06			1665.21	1.16711e-06	-1.01233e-06	1.23919e-06	4.19595e-08	2.44038e-07	-9.21515e-07			1665.21	1.16711e-06	-1.01233e-06	1.51822e-06	1.18208e-06	4.56515e-07	-4.74504e-07
1664.88	1.20221e-06	4.89851e-08	-6.44881e-08	-7.97808e-07	-8.44796e-07			1664.88	1.20221e-06	-8.44796e-07	1.33102e-06	1.98809e-07	2.91429e-07	-7.478e-07			1664.88	1.20221e-06	-8.44796e-07	1.59909e-06	1.29407e-06	4.86819e-07	-4.03783e-07
1664.56	1.19539e-06	3.14455e-09	-4.64371e-08	-6.28448e-07	-6.97468e-07			1664.56	1.19539e-06	-6.97468e-07	1.37369e-06	3.13738e-07	2.90652e-07	-5.97929e-07			1664.56	1.19539e-06	-6.97468e-07	1.62773e-06	1.37245e-06	4.63986e-07	-3.61974e-07
1664.24	1.14422e-06	-8.63691e-08	-7.25125e-08	-4.8758e-07	-5.79717e-07			1664.24	1.14422e-06	-5.79717e-07	1.36038e-06	3.75333e-07	2.34414e-07	-4.82922e-07			1664.24	1.14422e-06	-5.79717e-07	1.59811e-06	1.40366e-06	3.81378e-07	-3.57208e-07
1663.92	1.04624e-06	-2.22139e-07	-1.47452e-07	-3.83929e-07	-5.00132e-07			1663.92	1.04624e-06	-5.00132e-07	1.28534e-06	3.73544e-07	1.17305e-07	-4.12762e-07			1663.92	1.04624e-06	-5.00132e-07	1.50516e-06	1.37425e-06	2.34214e-07	-3.96842e-07
1663.6	8.99864e-07	-4.04723e-07	-2.7373e-07	-3.24578e-07	-4.65409e-07			1663.6	8.99864e-07	-4.65409e-07	1.1447e-06	3.02155e-07	-6.39783e-08	-3.9525e-07			1663.6	8.99864e-07	-4.65409e-07	1.34566e-06	1.27457e-06	1.98619e-08	-4.86268e-07
1663.28	7.0437e-07	-6.32403e-07	-4.51278e-07	-3.14083e-07	-4.79514e-07			1663.28	7.0437e-07	-4.79514e-07	9.36992e-07	1.59177e-07	-3.09491e-07	-4.3532e-07			1663.28	7.0437e-07	-4.79514e-07	1.11805e-06	1.09928e-06	-2.61238e-07	-6.27644e-07
1662.96	4.61839e-07	-9.00857e-07	-6.77435e-07	-3.54094e-07	-5.43288e-07			1662.96	4.61839e-07	-5.43288e-07	6.6441e-07	-5.32541e-08	-6.1584e-07	-5.34101e-07			1662.96	4.61839e-07	-5.43288e-07	8.23411e-07	8.47764e-07	-6.0558e-07	-8.21015e-07
1662.63	1.76258e-07	-1.2031e-06	-9.46414e-07	-4.42884e-07	-6.54237e-07			1662.63	1.76258e-07	-6.54237e-07	3.31586e-07	-3.28608e-07	-9.75989e-07	-6.89008e-07			1662.63	1.76258e-07	-6.54237e-07	4.6538e-07	5.24599e-07	-1.00645e-06	-1.06307e-06
1662.31	-1.45177e-07	-1.5295e-06	-1.24938e-06	-5.75028e-07	-8.05819e-07			1662.31	-1.45177e-07	-8.05819e-07	-5.31771e-08	-6.55052e-07	-1.37882e-06	-8.93196e-07			1662.31	-1.45177e-07	-8.05819e-07	5.10624e-08	1.39544e-07	-1.4528e-06	-1.34689e-06
1661.99	-4.93766e-07	-1.86842e-06	-1.57492e-06	-7.41955e-07	-9.88954e-07			1661.99	-4.93766e-07	-9.88954e-07	-4.80234e-07	-1.01854e-06	-1.81023e-06	-1.13653e-06			1661.99	-4.93766e-07	-9.88954e-07	-4.09704e-07	-2.97152e-07	-1.93065e-06	-1.66254e-06
1661.67	-8.58673e-07	-2.20642e-06	-1.9089e-06	-9.31837e-07	-1.19133e-06			1661.67	-8.58673e-07	-1.19133e-06	-9.38022e-07	-1.40097e-06	-2.25275e-06	-1.40521e-06			1661.67	-8.58673e-07	-1.19133e-06	-9.03108e-07	-7.6972e-07	-2.42201e-06	-1.9961e-06
1661.35	-1.22985e-06	-2.52961e-06	-2.23569e-06	-1.13098e-06	-1.39944e-06			1661.35	-1.22985e-06	-1.39944e-06	-1.4147e-06	-1.78385e-06	-2.68731e-06	-1.68351e-06			1661.35	-1.22985e-06	-1.39944e-06	-1.41424e-06	-1.26385e-06	-2.90696e-06	-2.33249e-06
1661.03	-1.59721e-06	-2.82389e-06	-2.53878e-06	-1.32441e-06	-1.5983e-06			1661.03	-1.59721e-06	-1.5983e-06	-1.89827e-06	-2.14753e-06	-3.09379e-06	-1.9541e-06			1661.03	-1.59721e-06	-1.5983e-06	-1.92654e-06	-1.76327e-06	-3.3637e-06	-2.65449e-06
1660.71	-1.95165e-06	-3.07558e-06	-2.80166e-06	-1.497e-06	-1.77329e-06			1660.71	-1.95165e-06	-1.77329e-06	-2.37631e-06	-2.47322e-06	-3.45224e-06	-2.19932e-06			1660.71	-1.95165e-06	-1.77329e-06	-2.42326e-06	-2.25059e-06	-3.77039e-06	-2.94391e-06
1660.38	-2.28561e-06	-3.27276e-06	-3.0089e-06	-1.63461e-06	-1.9105e-06			1660.38	-2.28561e-06	-1.9105e-06	-2.8367e-06	-2.74366e-06	-3.74404e-06	-2.40218e-06			1660.38	-2.28561e-06	-1.9105e-06	-2.88857e-06	-2.71002e-06	-4.10665e-06	-3.18363e-06
1660.06	-2.59112e-06	-3.40464e-06	-3.14668e-06	-1.7247e-06	-1.99745e-06			1660.06	-2.59112e-06	-1.99745e-06	-3.26583e-06	-2.94357e-06	-3.9524e-06	-2.54683e-06			1660.06	-2.59112e-06	-1.99745e-06	-3.30663e-06	-3.12443e-06	-4.35411e-06	-3.35776e-06
1659.74	-2.86042e-06	-3.46268e-06	-3.20406e-06	-1.75737e-06	-2.02412e-06			1659.74	-2.86042e-06	-2.02412e-06	-3.64925e-06	-3.06105e-06	-4.06344e-06	-2.61996e-06			1659.74	-2.86042e-06	-2.02412e-06	-3.66294e-06	-3.47676e-06	-4.49782e-06	-3.45287e-06
1659.42	-3.08452e-06	-3.44084e-06	-3.17348e-06	-1.72574e-06	-1.9835e-06			1659.42	-3.08452e-06	-1.9835e-06	-3.97206e-06	-3.08769e-06	-4.06668e-06	-2.61144e-06			1659.42	-3.08452e-06	-1.9835e-06	-3.94453e-06	-3.75219e-06	-4.52718e-06	-3.4591e-06
1659.1	-3.2541e-06	-3.33538e-06	-3.05101e-06	-1.626e-06	-1.87214e-06			1659.1	-3.2541e-06	-1.87214e-06	-4.21888e-06	-3.01879e-06	-3.95563e-06	-2.51499e-06			1659.1	-3.2541e-06	-1.87214e-06	-4.13932e-06	-3.93779e-06	-4.43645e-06	-3.37063e-06
1658.78	-3.35933e-06	-3.14526e-06	-2.83669e-06	-1.45785e-06	-1.6902e-06			1658.78	-3.35933e-06	-1.6902e-06	-4.37505e-06	-2.85419e-06	-3.72801e-06	-2.3286e-06			1658.78	-3.35933e-06	-1.6902e-06	-4.23739e-06	-4.02367e-06	-4.22466e-06	-3.18566e-06
1658.46	-3.39049e-06	-2.87154e-06	-2.53414e-06	-1.22385e-06	-1.4411e-06			1658.46	-3.39049e-06	-1.4411e-06	-4.42753e-06	-2.59703e-06	-3.38547e-06	-2.05389e-06			1658.46	-3.39049e-06	-1.4411e-06	-4.22962e-06	-4.00225e-06	-3.89534e-06	-2.90616e-06
1658.13	-3.33823e-06	-2.51748e-06	-2.14968e-06	-9.28821e-07	-1.13095e-06			1658.13	-3.33823e-06	-1.13095e-06	-4.36528e-06	-2.25319e-06	-2.93315e-06	-1.6959e-06			1658.13	-3.33823e-06	-1.13095e-06	-4.10856e-06	-3.86885e-06	-3.45576e-06	-2.53693e-06
1657.81	-3.19555e-06	-2.0883e-06	-1.6926e-06	-5.79947e-07	-7.68392e-07			1657.81	-3.19555e-06	-7.68392e-07	-4.18068e-06	-1.83143e-06	-2.38033e-06	-1.26267e-06			1657.81	-3.19555e-06	-7.68392e-07	-3.86943e-06	-3.62219e-06	-2.91681e-06	-2.08645e-06
1657.49	-2.95693e-06	-1.59052e-06	-1.1737e-06	-1.85616e-07	-3.62535e-07			1657.49	-2.95693e-06	-3.62535e-07	-3.86935e-06	-1.34099e-06	-1.73858e-06	-7.64307e-07			1657.49	-2.95693e-06	-3.62535e-07	-3.50949e-06	-3.26142e-06	-2.29165e-06	-1.56399e-06
1657.17	-2.61951e-06	-1.03252e-06	-6.05391e-07	2.44727e-07	7.67855e-08			1657.17	-2.61951e-06	7.67855e-08	-3.43074e-06	-7.92427e-07	-1.02245e-06	-2.12378e-07			1657.17	-2.61951e-06	7.67855e-08	-3.02862e-06	-2.78918e-06	-1.59549e-06	-9.80979e-07
1656.85	-2.1835e-06	-4.24281e-07	-1.11027e-09	7.00664e-07	5.39778e-07			1656.85	-2.1835e-06	5.39778e-07	-2.86817e-06	-1.968e-07	-2.48887e-07	3.80247e-07			1656.85	-2.1835e-06	5.39778e-07	-2.43118e-06	-2.21006e-06	-8.45507e-07	-3.50388e-07
1656.53	-1.65241e-06	2.22302e-07	6.24561e-07	1.17127e-06	1.01657e-06			1656.53	-1.65241e-06	1.01657e-06	-2.18958e-06	4.33815e-07	5.63113e-07	9.99546e-07			1656.53	-1.65241e-06	1.01657e-06	-1.72612e-06	-1.53378e-06	-6.02314e-08	3.13454e-07
1656.21	-1.03375e-06	8.93545e-07	1.25671e-06	1.64564e-06	1.49757e-06			1656.21	-1.03375e-06	1.49757e-06	-1.40711e-06	1.08623e-06	1.39338e-06	1.6309e-06			1656.21	-1.03375e-06	1.49757e-06	-9.27571e-07	-7.74813e-07	7.40369e-07	9.9422e-07
1655.88	-3.37697e-07	1.57484e-06	1.88107e-06	2.11328e-06	1.97354e-06			1655.88	-3.37697e-07	1.97354e-06	-5.36654e-07	1.74772e-06	2.22138e-06	2.25955e-06			1655.88	-3.37697e-07	1.97354e-06	-5.40613e-08	4.94297e-08	1.53671e-06	1.67593e-06
1655.56	4.22083e-07	2.25093e-06	2.4841e-06	2.56487e-06	2.43644e-06			1655.56	4.22083e-07	2.43644e-06	4.02211e-07	2.4051e-06	3.02723e-06	2.87183e-06			1655.56	4.22083e-07	2.43644e-06	8.72941e-07	9.1865e-07	2.3099e-06	2.34306e-06
1655.24	1.22872e-06	2.90685e-06	3.05382e-06	2.99262e-06	2.87899e-06			1655.24	1.22872e-06	2.87899e-06	1.38733e-06	3.04601e-06	3.79257e-06	3.45554e-06			1655.24	1.22872e-06	2.87899e-06	1.82909e-06	1.81012e-06	3.04275e-06	2.98092e-06
1654.92	2.0622e-06	3.52862e-06	3.58046e-06	3.39068e-06	3.29573e-06			1654.92	2.0622e-06	3.29573e-06	2.39424e-06	3.66018e-06	4.50146e-06	4.00082e-06			1654.92	2.0622e-06	3.29573e-06	2.78991e-06	2.70183e-06	3.72058e-06	3.57794e-06
1654.6	2.90163e-06	4.10396e-06	4.05643e-06	3.75545e-06	3.68307e-06			1654.6	2.90163e-06	3.68307e-06	3.39781e-06	4.23916e-06	5.14076e-06	4.50112e-06			1654.6	2.90163e-06	3.68307e-06	3.73141e-06	3.57253e-06	4.33223e-06	4.12543e-06
1654.28	3.72348e-06	4.62229e-06	4.47605e-06	4.08509e-06	4.03865e-06			1654.28	3.72348e-06	4.03865e-06	4.37205e-06	4.77543e-06	5.70004e-06	4.95226e-06			1654.28	3.72348e-06	4.03865e-06	4.62992e-06	4.40138e-06	4.86919e-06	4.61774e-06
1653.96	4.50502e-06	5.07544e-06	4.8356e-06	4.37972e-06	4.36204e-06			1653.96	4.50502e-06	4.36204e-06	5.29227e-06	5.26419e-06	6.17186e-06	5.3534e-06			1653.96	4.50502e-06	4.36204e-06	5.46372e-06	5.17019e-06	5.32711e-06	5.05198e-06
1653.64	5.22399e-06	5.45733e-06	5.13322e-06	4.64063e-06	4.65401e-06			1653.64	5.22399e-06	4.65401e-06	6.13507e-06	5.70103e-06	6.55136e-06	5.70585e-06			1653.64	5.22399e-06	4.65401e-06	6.21214e-06	5.86021e-06	5.70433e-06	5.4271e-06
1653.31	5.86087e-06	5.76455e-06	5.36891e-06	4.87039e-06	4.91688e-06			1653.31	5.86087e-06	4.91688e-06	6.88042e-06	6.08405e-06	6.8367e-06	6.01351e-06			1653.31	5.86087e-06	4.91688e-06	6.85786e-06	6.45536e-06	6.00262e-06	5.74481e-06
1652.99	6.40082e-06	5.99617e-06	5.54501e-06	5.07249e-06	5.15425e-06			1652.99	6.40082e-06	5.15425e-06	7.51312e-06	6.41375e-06	7.02891e-06	6.28197e-06			1652.99	6.40082e-06	5.15425e-06	7.38725e-06	6.94204e-06	6.22699e-06	6.00887e-06
1652.67	6.8335e-06	6.15352e-06	5.66558e-06	5.25068e-06	5.3702e-06			1652.67	6.8335e-06	5.3702e-06	8.02291e-06	6.69305e-06	7.13176e-06	6.51816e-06			1652.67	6.8335e-06	5.3702e-06	7.7913e-06	7.30899e-06	6.38479e-06	6.22456e-06
1652.35	7.15426e-06	6.24082e-06	5.73648e-06	5.40903e-06	5.56904e-06			1652.35	7.15426e-06	5.56904e-06	8.40616e-06	6.92724e-06	7.15221e-06	6.72956e-06			1652.35	7.15426e-06	5.56904e-06	8.06693e-06	7.55097e-06	6.48551e-06	6.39871e-06
1652.03	7.36415e-06	6.26438e-06	5.76558e-06	5.55135e-06	5.75528e-06			1652.03	7.36415e-06	5.75528e-06	8.66512e-06	7.12419e-06	7.10003e-06	6.92351e-06			1652.03	7.36415e-06	5.75528e-06	8.21734e-06	7.66886e-06	6.53998e-06	6.53981e-06
1651.71	7.46975e-06	6.23323e-06	5.7618e-06	5.68119e-06	5.93295e-06			1651.71	7.46975e-06	5.93295e-06	8.80825e-06	7.294e-06	6.98787e-06	7.10679e-06			1651.71	7.46975e-06	5.93295e-06	8.25137e-06	7.6701e-06	6.5594e-06	6.65713e-06
1651.39	7.48201e-06	6.15873e-06	5.73486e-06	5.80135e-06	6.10492e-06			1651.39	7.48201e-06	6.10492e-06	8.84887e-06	7.44749e-06	6.83059e-06	7.28467e-06			1651.39	7.48201e-06	6.10492e-06	8.18304e-06	7.56967e-06	6.55461e-06	6.75997e-06
1651.06	7.41529e-06	6.05411e-06	5.69461e-06	5.91391e-06	6.27316e-06			1651.06	7.41529e-06	6.27316e-06	8.80452e-06	7.5951e-06	6.64504e-06	7.46094e-06			1651.06	7.41529e-06	6.27316e-06	8.03043e-06	7.38828e-06	6.53567e-06	6.8569e-06
1650.74	7.28594e-06	5.93401e-06	5.65076e-06	6.0198e-06	6.43796e-06			1650.74	7.28594e-06	6.43796e-06	8.69539e-06	7.74623e-06	6.44905e-06	7.63719e-06			1650.74	7.28594e-06	6.43796e-06	7.81361e-06	7.15048e-06	6.51066e-06	6.95483e-06
1650.42	7.11037e-06	5.81287e-06	5.61115e-06	6.11819e-06	6.59732e-06			1650.42	7.11037e-06	6.59732e-06	8.54232e-06	7.90671e-06	6.25987e-06	7.81175e-06			1650.42	7.11037e-06	6.59732e-06	7.5523e-06	6.87948e-06	6.48515e-06	7.05704e-06
1650.1	6.90366e-06	5.70392e-06	5.58119e-06	6.20589e-06	6.74622e-06			1650.1	6.90366e-06	6.74622e-06	8.36557e-06	8.07752e-06	6.0926e-06	7.97935e-06			1650.1	6.90366e-06	6.74622e-06	7.26479e-06	6.59653e-06	6.46129e-06	7.16244e-06
1649.78	6.67918e-06	5.61781e-06	5.56332e-06	6.27721e-06	6.87679e-06			1649.78	6.67918e-06	6.87679e-06	8.18326e-06	8.25523e-06	5.95995e-06	8.13062e-06			1649.78	6.67918e-06	6.87679e-06	6.96691e-06	6.31732e-06	6.43797e-06	7.26518e-06
1649.46	6.44615e-06	5.5611e-06	5.55586e-06	6.32346e-06	6.97715e-06			1649.46	6.44615e-06	6.97715e-06	8.00943e-06	8.42981e-06	5.8698e-06	8.25187e-06			1649.46	6.44615e-06	6.97715e-06	6.67038e-06	6.04942e-06	6.41009e-06	7.3533e-06
1649.14	6.2104e-06	5.53636e-06	5.55356e-06	6.33351e-06	7.03238e-06			1649.14	6.2104e-06	7.03238e-06	7.85366e-06	8.58672e-06	5.82569e-06	8.32574e-06			1649.14	6.2104e-06	7.03238e-06	6.38186e-06	5.79352e-06	6.36927e-06	7.41014e-06
1648.81	5.9753e-06	5.5421e-06	5.54865e-06	6.29513e-06	7.02638e-06			1648.81	5.9753e-06	7.02638e-06	7.72118e-06	8.70782e-06	5.82706e-06	8.33318e-06			1648.81	5.9753e-06	7.02638e-06	6.10596e-06	5.5453e-06	6.30508e-06	7.41659e-06
1648.49	5.73984e-06	5.57286e-06	5.53115e-06	6.19566e-06	6.94224e-06			1648.49	5.73984e-06	6.94224e-06	7.61233e-06	8.77354e-06	5.86912e-06	8.25463e-06			1648.49	5.73984e-06	6.94224e-06	5.84205e-06	5.296e-06	6.20544e-06	7.35182e-06
1648.17	5.50152e-06	5.62036e-06	5.49047e-06	6.02364e-06	6.76535e-06			1648.17	5.50152e-06	6.76535e-06	7.52396e-06	8.76431e-06	5.94397e-06	8.07281e-06			1648.17	5.50152e-06	6.76535e-06	5.58788e-06	5.03641e-06	6.05888e-06	7.19741e-06
1647.85	5.25525e-06	5.67343e-06	5.41596e-06	5.77024e-06	6.48447e-06			1647.85	5.25525e-06	6.48447e-06	7.44896e-06	8.6629e-06	6.04076e-06	7.77449e-06			1647.85	5.25525e-06	6.48447e-06	5.33817e-06	4.7568e-06	5.85469e-06	6.93808e-06
1647.53	4.99314e-06	5.71855e-06	5.29724e-06	5.42964e-06	6.09277e-06			1647.53	4.99314e-06	6.09277e-06	7.37678e-06	8.45458e-06	6.14588e-06	7.35111e-06			1647.53	4.99314e-06	6.09277e-06	5.08421e-06	4.44764e-06	5.58354e-06	6.56319e-06
1647.21	4.70552e-06	5.7401e-06	5.12449e-06	5.00022e-06	5.58909e-06			1647.21	4.70552e-06	5.58909e-06	7.29345e-06	8.12824e-06	6.24318e-06	6.80017e-06			1647.21	4.70552e-06	5.58909e-06	4.81487e-06	4.09987e-06	5.23831e-06	6.06797e-06
1646.89	4.38185e-06	5.72084e-06	4.88893e-06	4.48476e-06	4.97784e-06			1646.89	4.38185e-06	4.97784e-06	7.18133e-06	7.67653e-06	6.31395e-06	6.12537e-06			1646.89	4.38185e-06	4.97784e-06	4.51598e-06	3.70465e-06	4.81446e-06	5.4538e-06
1646.56	4.00804e-06	5.64192e-06	4.58189e-06	3.88989e-06	4.2683e-06			1646.56	4.00804e-06	4.2683e-06	7.01879e-06	7.09521e-06	6.33679e-06	5.33594e-06			1646.56	4.00804e-06	4.2683e-06	4.16989e-06	3.2504e-06	4.30903e-06	4.72649e-06
1646.24	3.57104e-06	5.48446e-06	4.19633e-06	3.22657e-06	3.47568e-06			1646.24	3.57104e-06	3.47568e-06	6.78192e-06	6.38498e-06	6.2886e-06	4.44731e-06			1646.24	3.57104e-06	3.47568e-06	3.7581e-06	2.72683e-06	3.72221e-06	3.89783e-06
1645.92	3.05741e-06	5.2301e-06	3.72703e-06	2.50934e-06	2.61946e-06			1645.92	3.05741e-06	2.61946e-06	6.44483e-06	5.55051e-06	6.14526e-06	3.48004e-06			1645.92	3.05741e-06	2.61946e-06	3.26166e-06	2.12295e-06	3.05626e-06	2.98401e-06
1645.6	2.45506e-06	4.8623e-06	3.17089e-06	1.75573e-06	1.72294e-06			1645.6	2.45506e-06	1.72294e-06	5.98161e-06	4.60119e-06	5.88273e-06	2.4593e-06			1645.6	2.45506e-06	1.72294e-06	2.66265e-06	1.42971e-06	2.31602e-06	2.00538e-06
1645.28	1.7553e-06	4.36752e-06	2.52849e-06	9.85963e-07	8.12789e-07			1645.28	1.7553e-06	8.12789e-07	5.36861e-06	3.55207e-06	5.47894e-06	1.41416e-06			1645.28	1.7553e-06	8.12789e-07	1.94669e-06	6.40553e-07	1.5093e-06	9.86039e-07
1644.96	9.52864e-07	3.73615e-06	1.8035e-06	2.21569e-07	-8.29649e-08			1644.96	9.52864e-07	-8.29649e-08	4.58529e-06	2.42218e-06	4.91479e-06	3.75764e-07			1644.96	9.52864e-07	-8.29649e-08	1.10304e-06	-2.48137e-07	6.46029e-07	-4.75027e-08
1644.64	4.75114e-08	2.96344e-06	1.00338e-06	-5.15143e-07	-9.35793e-07			1644.64	4.75114e-08	-9.35793e-07	3.6171e-06	1.23534e-06	4.17622e-06	-6.23918e-07			1644.64	4.75114e-08	-9.35793e-07	1.2617e-07	-1.23507e-06	-2.61436e-07	-1.06733e-06
1644.31	-9.54653e-07	2.05069e-06	1.39837e-07	-1.20207e-06	-1.71764e-06			1644.31	-9.54653e-07	-1.71764e-06	2.45705e-06	1.96596e-08	3.25585e-06	-1.55334e-06			1644.31	-9.54653e-07	-1.71764e-06	-9.82208e-07	-2.31351e-06	-1.19764e-06	-2.04482e-06
1643.99	-2.04272e-06	1.00556e-06	-7.72885e-07	-1.81879e-06	-2.40392e-06			1643.99	-2.04272e-06	-2.40392e-06	1.10639e-06	-1.19479e-06	2.15422e-06	-2.38423e-06			1643.99	-2.04272e-06	-2.40392e-06	-2.21515e-06	-3.47215e-06	-2.14542e-06	-2.95304e-06
1643.67	-3.19982e-06	-1.57483e-07	-1.71697e-06	-2.3475e-06	-2.97422e-06			1643.67	-3.19982e-06	-2.97422e-06	-4.23666e-07	-2.3766e-06	8.81279e-07	-3.09244e-06			1643.67	-3.19982e-06	-2.97422e-06	-3.55744e-06	-4.69415e-06	-3.08477e-06	-3.76767e-06
1643.35	-4.40373e-06	-1.4169e-06	-2.67194e-06	-2.77413e-06	-3.41369e-06			1643.35	-4.40373e-06	-3.41369e-06	-2.11063e-06	-3.49467e-06	-5.42572e-07	-3.65906e-06			1643.35	-4.40373e-06	-3.41369e-06	-4.98633e-06	-5.95774e-06	-3.99353e-06	-4.46845e-06
1643.03	-5.62655e-06	-2.74408e-06	-3.61479e-06	-3.08938e-06	-3.71379e-06			1643.03	-5.62655e-06	-3.71379e-06	-3.92077e-06	-4.51911e-06	-2.08621e-06	-4.07164e-06			1643.03	-5.62655e-06	-3.71379e-06	-6.47051e-06	-7.23589e-06	-4.84785e-06	-5.03935e-06
1642.71	-6.83502e-06	-4.10399e-06	-4.52063e-06	-3.28908e-06	-3.873e-06			1642.71	-6.83502e-06	-3.873e-06	-5.8083e-06	-5.42235e-06	-3.70774e-06	-4.32425e-06			1642.71	-6.83502e-06	-3.873e-06	-7.97042e-06	-8.49632e-06	-5.62222e-06	-5.46953e-06
1642.39	-7.99061e-06	-5.45541e-06	-5.36277e-06	-3.37418e-06	-3.89612e-06			1642.39	-7.99061e-06	-3.89612e-06	-7.71651e-06	-6.1799e-06	-5.35556e-06	-4.4173e-06			1642.39	-7.99061e-06	-3.89612e-06	-9.43823e-06	-9.70037e-06	-6.29058e-06	-5.75262e-06
1642.06	-9.05029e-06	-6.75231e-06	-6.11349e-06	-3.35003e-06	-3.79309e-06			1642.06	-9.05029e-06	-3.79309e-06	-9.57923e-06	-6.76972e-06	-6.96975e-06	-4.35646e-06			1642.06	-9.05029e-06	-3.79309e-06	-1.08194e-05	-1.08035e-05	-6.82662e-06	-5.88649e-06
1641.74	-9.96766e-06	-7.9453e-06	-6.74474e-06	-3.2254e-06	-3.57793e-06			1641.74	-9.96766e-06	-3.57793e-06	-1.13233e-05	-7.17369e-06	-8.48511e-06	-4.15195e-06			1641.74	-9.96766e-06	-3.57793e-06	-1.20556e-05	-1.17587e-05	-7.20517e-06	-5.8718e-06
1641.42	-1.06946e-05	-8.98335e-06	-7.22898e-06	-3.01101e-06	-3.26683e-06			1641.42	-1.06946e-05	-3.26683e-06	-1.28719e-05	-7.37657e-06	-9.8338e-06	-3.8168e-06			1641.42	-1.06946e-05	-3.26683e-06	-1.30863e-05	-1.25149e-05	-7.40328e-06	-5.71154e-06
1641.1	-1.1185e-05	-9.81671e-06	-7.54002e-06	-2.71784e-06	-2.87547e-06			1641.1	-1.1185e-05	-2.87547e-06	-1.41489e-05	-7.36633e-06	-1.09495e-05	-3.36519e-06			1641.1	-1.1185e-05	-2.87547e-06	-1.38526e-05	-1.30227e-05	-7.4012e-06	-5.40951e-06
1640.78	-1.13986e-05	-1.04004e-05	-7.65513e-06	-2.3563e-06	-2.4187e-06			1640.78	-1.13986e-05	-2.4187e-06	-1.50841e-05	-7.13555e-06	-1.17716e-05	-2.81173e-06			1640.78	-1.13986e-05	-2.4187e-06	-1.43024e-05	-1.32392e-05	-7.18436e-06	-4.97056e-06
1640.46	-1.13038e-05	-1.06964e-05	-7.55553e-06	-1.93473e-06	-1.9082e-06			1640.46	-1.13038e-05	-1.9082e-06	-1.56172e-05	-6.68108e-06	-1.22493e-05	-2.16967e-06			1640.46	-1.13038e-05	-1.9082e-06	-1.43925e-05	-1.31297e-05	-6.7442e-06	-4.40002e-06
1640.14	-1.08819e-05	-1.06775e-05	-7.22876e-06	-1.45919e-06	-1.35288e-06			1640.14	-1.08819e-05	-1.35288e-06	-1.57025e-05	-6.00415e-06	-1.23447e-05	-1.45049e-06			1640.14	-1.08819e-05	-1.35288e-06	-1.40934e-05	-1.26728e-05	-6.07945e-06	-3.70401e-06
1639.81	-1.01288e-05	-1.03291e-05	-6.67018e-06	-9.33674e-07	-7.58478e-07			1639.81	-1.01288e-05	-7.58478e-07	-1.53126e-05	-5.11201e-06	-1.20366e-05	-6.63884e-07			1639.81	-1.01288e-05	-7.58478e-07	-1.33912e-05	-1.18629e-05	-5.19709e-06	-2.89042e-06
1639.49	-9.05507e-06	-9.65036e-06	-5.88396e-06	-3.6024e-07	-1.27893e-07			1639.49	-9.05507e-06	-1.27893e-07	-1.44399e-05	-4.01701e-06	-1.13213e-05	1.82907e-07			1639.49	-9.05507e-06	-1.27893e-07	-1.22891e-05	-1.07095e-05	-4.11206e-06	-1.9684e-06
1639.17	-7.68599e-06	-8.65489e-06	-4.88318e-06	2.59923e-07	5.37743e-07			1639.17	-7.68599e-06	5.37743e-07	-1.30981e-05	-2.73699e-06	-1.0214e-05	1.08444e-06			1639.17	-7.68599e-06	5.37743e-07	-1.08072e-05	-9.23718e-06	-2.84738e-06	-9.49498e-07
1638.85	-6.06023e-06	-7.36981e-06	-3.69094e-06	9.25526e-07	1.2383e-06			1638.85	-6.06023e-06	1.2383e-06	-1.13213e-05	-1.29556e-06	-8.74735e-06	2.03628e-06			1638.85	-6.06023e-06	1.2383e-06	-8.98253e-06	-7.48434e-06	-1.43362e-06	1.52236e-07
1638.53	-4.22523e-06	-5.8338e-06	-2.33778e-06	1.63509e-06	1.97437e-06			1638.53	-4.22523e-06	1.97437e-06	-9.16195e-06	2.78745e-07	-6.96982e-06	3.03492e-06			1638.53	-4.22523e-06	1.97437e-06	-6.86551e-06	-5.49834e-06	9.29949e-08	1.3213e-06
1638.21	-2.23672e-06	-4.09536e-06	-8.60797e-07	2.38595e-06	2.74598e-06			1638.21	-2.23672e-06	2.74598e-06	-6.68874e-06	1.95376e-06	-4.94242e-06	4.07698e-06			1638.21	-2.23672e-06	2.74598e-06	-4.51781e-06	-3.33689e-06	1.6915e-06	2.54016e-06
1637.89	-1.54894e-07	-2.20988e-06	6.98588e-07	3.17393e-06	3.55188e-06			1637.89	-1.54894e-07	3.55188e-06	-3.98242e-06	3.69406e-06	-2.73517e-06	5.15832e-06			1637.89	-1.54894e-07	3.55188e-06	-2.00983e-06	-1.06216e-06	3.31807e-06	3.78974e-06
1637.56	1.95864e-06	-2.37029e-07	2.29727e-06	3.99335e-06	4.3895e-06			1637.56	1.95864e-06	4.3895e-06	-1.13185e-06	5.46359e-06	-4.23057e-07	6.2737e-06			1637.56	1.95864e-06	4.3895e-06	5.84052e-07	1.25924e-06	4.92826e-06	5.04994e-06
1637.24	4.04221e-06	1.76193e-06	3.89177e-06	4.836e-06	5.25334e-06			1637.24	4.04221e-06	5.25334e-06	1.77065e-06	7.22651e-06	1.91758e-06	7.41519e-06			1637.24	4.04221e-06	5.25334e-06	3.18839e-06	3.56084e-06	6.478e-06	6.29934e-06
1636.92	6.03618e-06	3.72622e-06	5.43898e-06	5.69004e-06	6.13381e-06			1636.92	6.03618e-06	6.13381e-06	4.63307e-06	8.94658e-06	4.21211e-06	8.57072e-06			1636.92	6.03618e-06	6.13381e-06	5.7292e-06	5.77709e-06	7.92489e-06	7.51426e-06
1636.6	7.8848e-06	5.59768e-06	6.89741e-06	6.53936e-06	7.01636e-06			1636.6	7.8848e-06	7.01636e-06	7.36793e-06	1.05877e-05	6.3906e-06	9.72292e-06			1636.6	7.8848e-06	7.01636e-06	8.13698e-06	7.84671e-06	9.22931e-06	8.66861e-06
1636.28	9.53724e-06	7.32189e-06	8.22699e-06	7.3621e-06	7.87993e-06			1636.28	9.53724e-06	7.87993e-06	9.89497e-06	1.21122e-05	8.38952e-06	1.08468e-05			1636.28	9.53724e-06	7.87993e-06	1.03478e-05	9.71426e-06	1.03544e-05	9.73263e-06
1635.96	1.09505e-05	8.85016e-06	9.38987e-06	8.13052e-06	8.69742e-06			1635.96	1.09505e-05	8.69742e-06	1.21442e-05	1.34804e-05	1.0153e-05	1.191e-05			1635.96	1.09505e-05	8.69742e-06	1.23064e-05	1.13321e-05	1.1267e-05	1.06735e-05
1635.64	1.20887e-05	1.01394e-05	1.035e-05	8.81056e-06	9.43475e-06			1635.64	1.20887e-05	9.43475e-06	1.40566e-05	1.46492e-05	1.16331e-05	1.28716e-05			1635.64	1.20887e-05	9.43475e-06	1.39652e-05	1.26609e-05	1.19373e-05	1.14549e-05
1635.31	1.29245e-05	1.11533e-05	1.10743e-05	9.36295e-06	1.0052e-05			1635.31	1.29245e-05	1.0052e-05	1.55852e-05	1.5573e-05	1.27899e-05	1.36828e-05			1635.31	1.29245e-05	1.0052e-05	1.52862e-05	1.36708e-05	1.23387e-05	1.20383e-05
1634.99	1.34372e-05	1.18614e-05	1.15322e-05	9.74397e-06	1.05038e-05			1634.99	1.34372e-05	1.05038e-05	1.66938e-05	1.62033e-05	1.35898e-05	1.42877e-05			1634.99	1.34372e-05	1.05038e-05	1.6239e-05	1.43405e-05	1.24475e-05	1.23834e-05
1634.67	1.36113e-05	1.22388e-05	1.16957e-05	9.90718e-06	1.07413e-05			1634.67	1.36113e-05	1.07413e-05	1.73546e-05	1.64893e-05	1.40043e-05	1.46246e-05			1634.67	1.36113e-05	1.07413e-05	1.68e-05	1.46554e-05	1.2242e-05	1.24491e-05
1634.35	1.34347e-05	1.22655e-05	1.15399e-05	9.80605e-06	1.07132e-05			1634.35	1.34347e-05	1.07132e-05	1.75476e-05	1.63804e-05	1.40085e-05	1.46287e-05			1634.35	1.34347e-05	1.07132e-05	1.69521e-05	1.46066e-05	1.17033e-05	1.21952e-05
1634.03	1.28969e-05	1.19256e-05	1.10438e-05	9.39605e-06	1.03695e-05			1634.03	1.28969e-05	1.03695e-05	1.72583e-05	1.58285e-05	1.35814e-05	1.42354e-05			1634.03	1.28969e-05	1.03695e-05	1.66822e-05	1.41881e-05	1.08154e-05	1.15842e-05
1633.71	1.19877e-05	1.12067e-05	1.01901e-05	8.63801e-06	9.66378e-06			1633.71	1.19877e-05	9.66378e-06	1.64759e-05	1.47895e-05	1.2705e-05	1.33842e-05			1633.71	1.19877e-05	9.66378e-06	1.59812e-05	1.33957e-05	9.56615e-06	1.0583e-05
1633.39	1.06982e-05	1.01016e-05	8.9683e-06	7.50191e-06	8.5582e-06			1633.39	1.06982e-05	8.5582e-06	1.51952e-05	1.32281e-05	1.13667e-05	1.20239e-05			1633.39	1.06982e-05	8.5582e-06	1.48449e-05	1.22275e-05	7.9505e-06	9.16728e-06
1633.07	9.02273e-06	8.60857e-06	7.37489e-06	5.96944e-06	7.02675e-06			1633.07	9.02273e-06	7.02675e-06	1.34168e-05	1.1121e-05	9.56116e-06	1.01177e-05			1633.07	9.02273e-06	7.02675e-06	1.3274e-05	1.06844e-05	5.9719e-06	7.32335e-06
1632.74	6.96245e-06	6.73437e-06	5.41707e-06	4.0373e-06	5.0594e-06			1632.74	6.96245e-06	5.0594e-06	1.11498e-05	8.46153e-06	7.29394e-06	7.64814e-06			1632.74	6.96245e-06	5.0594e-06	1.12768e-05	8.77389e-06	3.64542e-06	5.0525e-06
1632.42	4.52804e-06	4.49559e-06	3.11283e-06	1.71908e-06	2.66457e-06			1632.42	4.52804e-06	2.66457e-06	8.41469e-06	5.2624e-06	4.58413e-06	4.62064e-06			1632.42	4.52804e-06	2.66457e-06	8.87019e-06	6.51102e-06	9.99558e-07	2.37308e-06
1632.1	1.74358e-06	1.92169e-06	4.94225e-07	-9.53217e-07	-1.28432e-07			1632.1	1.74358e-06	-1.28432e-07	5.24607e-06	1.55914e-06	1.46703e-06	1.06682e-06			1632.1	1.74358e-06	-1.28432e-07	6.08252e-06	3.92253e-06	-1.92252e-06	-6.77541e-07
1631.78	-1.35111e-06	-9.43394e-07	-2.39261e-06	-3.92875e-06	-3.26897e-06			1631.78	-1.35111e-06	-3.26897e-06	1.69505e-06	-2.5886e-06	-2.00357e-06	-2.95382e-06			1631.78	-1.35111e-06	-3.26897e-06	2.95461e-06	1.04862e-06	-5.06259e-06	-4.04213e-06
1631.46	-4.69941e-06	-4.04042e-06	-5.48582e-06	-7.13792e-06	-6.68499e-06			1631.46	-4.69941e-06	-6.68499e-06	-2.16951e-06	-7.09583e-06	-5.7544e-06	-7.3539e-06			1631.46	-4.69941e-06	-6.68499e-06	-4.58215e-07	-2.05707e-06	-8.34803e-06	-7.64405e-06
1631.14	-8.22844e-06	-7.29461e-06	-8.70932e-06	-1.04941e-05	-1.02852e-05			1631.14	-8.22844e-06	-1.02852e-05	-6.26152e-06	-1.1854e-05	-9.69403e-06	-1.20197e-05			1631.14	-8.22844e-06	-1.02852e-05	-4.08594e-06	-5.32788e-06	-1.1694e-05	-1.13889e-05
1630.82	-1.18511e-05	-1.06182e-05	-1.19739e-05	-1.38963e-05	-1.39619e-05			1630.82	-1.18511e-05	-1.39619e-05	-1.04792e-05	-1.67331e-05	-1.37149e-05	-1.68148e-05			1630.82	-1.18511e-05	-1.39619e-05	-7.84459e-06	-8.68653e-06	-1.50061e-05	-1.51684e-05
1630.49	-1.54699e-05	-1.39138e-05	-1.51815e-05	-1.72337e-05	-1.75963e-05			1630.49	-1.54699e-05	-1.75963e-05	-1.47092e-05	-2.15869e-05	-1.76977e-05	-2.15863e-05			1630.49	-1.54699e-05	-1.75963e-05	-1.16381e-05	-1.20478e-05	-1.81848e-05	-1.88641e-05
1630.17	-1.89813e-05	-1.70786e-05	-1.82293e-05	-2.03915e-05	-2.10645e-05			1630.17	-1.89813e-05	-2.10645e-05	-1.88315e-05	-2.62603e-05	-2.1518e-05	-2.61726e-05			1630.17	-1.89813e-05	-2.10645e-05	-1.5363e-05	-1.53214e-05	-2.11304e-05	-2.23551e-05
1629.85	-2.22808e-05	-2.00108e-05	-2.10165e-05	-2.3257e-05	-2.42434e-05			1629.85	-2.22808e-05	-2.42434e-05	-2.27254e-05	-3.05967e-05	-2.50525e-05	-3.04129e-05			1629.85	-2.22808e-05	-2.42434e-05	-1.89124e-05	-1.84175e-05	-2.37478e-05	-2.55226e-05
1629.53	-2.52681e-05	-2.26147e-05	-2.34493e-05	-2.5727e-05	-2.70192e-05			1629.53	-2.52681e-05	-2.70192e-05	-2.62757e-05	-3.44485e-05	-2.81862e-05	-3.41562e-05			1629.53	-2.52681e-05	-2.70192e-05	-2.21831e-05	-2.12489e-05	-2.59527e-05	-2.82583e-05
1629.21	-2.78528e-05	-2.48071e-05	-2.54484e-05	-2.77143e-05	-2.92937e-05			1629.21	-2.78528e-05	-2.92937e-05	-2.93802e-05	-3.76867e-05	-3.08205e-05	-3.72719e-05			1629.21	-2.78528e-05	-2.92937e-05	-2.5082e-05	-2.37373e-05	-2.76763e-05	-3.04712e-05
1628.89	-2.99588e-05	-2.6522e-05	-2.69527e-05	-2.91529e-05	-3.09907e-05			1628.89	-2.99588e-05	-3.09907e-05	-3.19545e-05	-4.02085e-05	-3.2878e-05	-3.96574e-05			1628.89	-2.99588e-05	-3.09907e-05	-2.75314e-05	-2.58175e-05	-2.88699e-05	-3.20932e-05
1628.57	-3.15283e-05	-2.77141e-05	-2.79233e-05	-3.00021e-05	-3.20598e-05			1628.57	-3.15283e-05	-3.20598e-05	-3.39367e-05	-4.19439e-05	-3.43075e-05	-4.1244e-05			1628.57	-3.15283e-05	-3.20598e-05	-2.94731e-05	-2.74403e-05	-2.95072e-05	-3.30823e-05
1628.24	-3.25264e-05	-2.83618e-05	-2.83458e-05	-3.02491e-05	-3.24808e-05			1628.24	-3.25264e-05	-3.24808e-05	-3.52911e-05	-4.28599e-05	-3.50875e-05	-4.20014e-05			1628.24	-3.25264e-05	-3.24808e-05	-3.08722e-05	-2.85775e-05	-2.9587e-05	-3.34265e-05
1627.92	-3.29415e-05	-2.84676e-05	-2.82301e-05	-2.99088e-05	-3.22633e-05			1627.92	-3.29415e-05	-3.22633e-05	-3.60089e-05	-4.29604e-05	-3.52254e-05	-4.19381e-05			1627.92	-3.29415e-05	-3.22633e-05	-3.17169e-05	-2.92201e-05	-2.91323e-05	-3.31425e-05
1627.6	-3.27854e-05	-2.8057e-05	-2.76085e-05	-2.90224e-05	-3.14459e-05			1627.6	-3.27854e-05	-3.14459e-05	-3.61071e-05	-4.22851e-05	-3.47568e-05	-4.11001e-05			1627.6	-3.27854e-05	-3.14459e-05	-3.20168e-05	-2.93788e-05	-2.81889e-05	-3.22738e-05
1627.28	-3.20922e-05	-2.71764e-05	-2.65343e-05	-2.76541e-05	-3.00941e-05			1627.28	-3.20922e-05	-3.00941e-05	-3.56273e-05	-4.0906e-05	-3.37421e-05	-3.9567e-05			1627.28	-3.20922e-05	-3.00941e-05	-3.18019e-05	-2.9081e-05	-2.68223e-05	-3.08882e-05
1626.96	-3.09155e-05	-2.58901e-05	-2.50777e-05	-2.58872e-05	-2.82948e-05			1626.96	-3.09155e-05	-2.82948e-05	-3.46314e-05	-3.89223e-05	-3.22618e-05	-3.74466e-05			1626.96	-3.09155e-05	-2.82948e-05	-3.11191e-05	-2.83695e-05	-2.51136e-05	-2.90729e-05
1626.64	-2.93236e-05	-2.42748e-05	-2.33206e-05	-2.38175e-05	-2.61511e-05			1626.64	-2.93236e-05	-2.61511e-05	-3.31969e-05	-3.6453e-05	-3.04102e-05	-3.48673e-05			1626.64	-2.93236e-05	-2.61511e-05	-3.00286e-05	-2.72969e-05	-2.31539e-05	-2.69281e-05
1626.32	-2.73957e-05	-2.24159e-05	-2.13525e-05	-2.15485e-05	-2.37752e-05			1626.32	-2.73957e-05	-2.37752e-05	-3.14121e-05	-3.36311e-05	-2.82894e-05	-3.19702e-05			1626.32	-2.73957e-05	-2.37752e-05	-2.86007e-05	-2.59227e-05	-2.10386e-05	-2.45621e-05
1625.99	-2.52166e-05	-2.04014e-05	-1.92657e-05	-1.91851e-05	-2.12823e-05			1625.99	-2.52166e-05	-2.12823e-05	-2.93704e-05	-3.0595e-05	-2.60031e-05	-2.89009e-05			1625.99	-2.52166e-05	-2.12823e-05	-2.69117e-05	-2.43117e-05	-1.88625e-05	-2.20847e-05
1625.67	-2.28723e-05	-1.83174e-05	-1.71488e-05	-1.68272e-05	-1.87828e-05			1625.67	-2.28723e-05	-1.87828e-05	-2.71641e-05	-2.74803e-05	-2.36498e-05	-2.58002e-05			1625.67	-2.28723e-05	-1.87828e-05	-2.5038e-05	-2.25279e-05	-1.67131e-05	-1.96006e-05
1625.35	-2.04455e-05	-1.62431e-05	-1.50832e-05	-1.45652e-05	-1.63772e-05			1625.35	-2.04455e-05	-1.63772e-05	-2.48801e-05	-2.44127e-05	-2.13179e-05	-2.27973e-05			1625.35	-2.04455e-05	-1.63772e-05	-2.30537e-05	-2.06348e-05	-1.46673e-05	-1.72046e-05
1625.03	-1.80111e-05	-1.4247e-05	-1.31379e-05	-1.24757e-05	-1.41504e-05			1625.03	-1.80111e-05	-1.41504e-05	-2.2594e-05	-2.15004e-05	-1.90814e-05	-2.00026e-05			1625.03	-1.80111e-05	-1.41504e-05	-2.10254e-05	-1.86898e-05	-1.27868e-05	-1.4976e-05
1624.71	-1.56341e-05	-1.23843e-05	-1.13667e-05	-1.06178e-05	-1.21681e-05			1624.71	-1.56341e-05	-1.21681e-05	-2.0368e-05	-1.88297e-05	-1.69963e-05	-1.75027e-05			1624.71	-1.56341e-05	-1.21681e-05	-1.90087e-05	-1.67442e-05	-1.11158e-05	-1.29751e-05
1624.39	-1.33664e-05	-1.06944e-05	-9.80611e-06	-9.03187e-06	-1.04749e-05			1624.39	-1.33664e-05	-1.04749e-05	-1.82479e-05	-1.64608e-05	-1.50994e-05	-1.53569e-05			1624.39	-1.33664e-05	-1.04749e-05	-1.70469e-05	-1.48405e-05	-9.6806e-06	-1.12421e-05
1624.07	-1.12466e-05	-9.20135e-06	-8.47531e-06	-7.73842e-06	-9.0938e-06			1624.07	-1.12466e-05	-9.0938e-06	-1.62637e-05	-1.44272e-05	-1.34087e-05	-1.35966e-05			1624.07	-1.12466e-05	-9.0938e-06	-1.51704e-05	-1.30113e-05	-8.48969e-06	-9.79604e-06
1623.74	-9.29977e-06	-7.91464e-06	-7.37682e-06	-6.73939e-06	-8.02697e-06			1623.74	-9.29977e-06	-8.02697e-06	-1.44305e-05	-1.27374e-05	-1.19249e-05	-1.22263e-05			1623.74	-9.29977e-06	-8.02697e-06	-1.33974e-05	-1.12801e-05	-7.53556e-06	-8.63655e-06
1623.42	-7.53878e-06	-6.83128e-06	-6.4998e-06	-6.02055e-06	-7.25972e-06			1623.42	-7.53878e-06	-7.25972e-06	-1.27522e-05	-1.13781e-05	-1.06355e-05	-1.12268e-05			1623.42	-7.53878e-06	-7.25972e-06	-1.17365e-05	-9.66133e-06	-6.79794e-06	-7.74719e-06
1623.1	-5.96698e-06	-5.93884e-06	-5.82307e-06	-5.55469e-06	-6.76266e-06			1623.1	-5.96698e-06	-6.76266e-06	-1.12235e-05	-1.03194e-05	-9.51769e-06	-1.05598e-05			1623.1	-5.96698e-06	-6.76266e-06	-1.01895e-05	-8.16178e-06	-6.24698e-06	-7.09877e-06
1622.78	-4.57973e-06	-5.218e-06	-5.31874e-06	-5.30524e-06	-6.49669e-06			1622.78	-4.57973e-06	-6.49669e-06	-9.83508e-06	-9.52023e-06	-8.54341e-06	-1.01732e-05			1622.78	-4.57973e-06	-6.49669e-06	-8.75363e-06	-6.78229e-06	-5.84683e-06	-6.65408e-06
1622.46	-3.36767e-06	-4.64561e-06	-4.95522e-06	-5.23022e-06	-6.41659e-06			1622.46	-3.36767e-06	-6.41659e-06	-8.57509e-06	-8.93282e-06	-7.68299e-06	-1.00068e-05			1622.46	-3.36767e-06	-6.41659e-06	-7.42514e-06	-5.52057e-06	-5.55944e-06	-6.37151e-06
1622.14	-2.3186e-06	-4.19716e-06	-4.70033e-06	-5.28548e-06	-6.47475e-06			1622.14	-2.3186e-06	-6.47475e-06	-7.43222e-06	-8.50736e-06	-6.90811e-06	-9.99708e-06			1622.14	-2.3186e-06	-6.47475e-06	-6.20016e-06	-4.37194e-06	-5.34682e-06	-6.20801e-06
1621.82	-1.41882e-06	-3.84861e-06	-4.52247e-06	-5.4277e-06	-6.62379e-06			1621.82	-1.41882e-06	-6.62379e-06	-6.39606e-06	-8.19479e-06	-6.19388e-06	-1.00811e-05			1621.82	-1.41882e-06	-6.62379e-06	-5.07575e-06	-3.3298e-06	-5.17391e-06	-6.12218e-06
1621.49	-6.55097e-07	-3.57743e-06	-4.39317e-06	-5.61627e-06	-6.81888e-06			1621.49	-6.55097e-07	-6.81888e-06	-5.45818e-06	-7.94954e-06	-5.52049e-06	-1.02006e-05			1621.49	-6.55097e-07	-6.81888e-06	-4.04986e-06	-2.39025e-06	-5.01045e-06	-6.07565e-06
1621.17	-1.40461e-08	-3.36345e-06	-4.28716e-06	-5.81445e-06	-7.01871e-06			1621.17	-1.40461e-08	-7.01871e-06	-4.61111e-06	-7.72958e-06	-4.87264e-06	-1.03032e-05			1621.17	-1.40461e-08	-7.01871e-06	-3.12046e-06	-1.55033e-06	-4.83126e-06	-6.03408e-06
1620.85	5.17801e-07	-3.18815e-06	-4.18247e-06	-5.98999e-06	-7.18638e-06			1620.85	5.17801e-07	-7.18638e-06	-3.8469e-06	-7.49723e-06	-4.23918e-06	-1.0343e-05			1620.85	5.17801e-07	-7.18638e-06	-2.28476e-06	-8.06909e-07	-4.61719e-06	-5.9671e-06
1620.53	9.54643e-07	-3.03489e-06	-4.06086e-06	-6.11486e-06	-7.28944e-06			1620.53	9.54643e-07	-7.28944e-06	-3.15675e-06	-7.21974e-06	-3.6119e-06	-1.02814e-05			1620.53	9.54643e-07	-7.28944e-06	-1.53736e-06	-1.57409e-07	-4.35445e-06	-5.84885e-06
1620.21	1.31258e-06	-2.88781e-06	-3.90701e-06	-6.1654e-06	-7.30014e-06			1620.21	1.31258e-06	-7.30014e-06	-2.52935e-06	-6.87012e-06	-2.9839e-06	-1.00867e-05			1620.21	1.31258e-06	-7.30014e-06	-8.6999e-07	4.02995e-07	-4.03361e-06	-5.65758e-06
1619.89	1.60878e-06	-2.73216e-06	-3.70937e-06	-6.1229e-06	-7.19697e-06			1619.89	1.60878e-06	-7.19697e-06	-1.95223e-06	-6.4279e-06	-2.35007e-06	-9.73549e-06			1619.89	1.60878e-06	-7.19697e-06	-2.71788e-07	8.80351e-07	-3.65053e-06	-5.37763e-06
1619.57	1.86017e-06	-2.55473e-06	-3.45998e-06	-5.97391e-06	-6.96544e-06			1619.57	1.86017e-06	-6.96544e-06	-1.41164e-06	-5.88128e-06	-1.70647e-06	-9.2131e-06			1619.57	1.86017e-06	-6.96544e-06	2.68733e-07	1.28355e-06	-3.20474e-06	-4.99926e-06
1619.24	2.08294e-06	-2.34466e-06	-3.15483e-06	-5.71098e-06	-6.59821e-06			1619.24	2.08294e-06	-6.59821e-06	-8.94413e-07	-5.22643e-06	-1.05115e-06	-8.51428e-06			1619.24	2.08294e-06	-6.59821e-06	7.62495e-07	1.62206e-06	-2.70002e-06	-4.52013e-06
1618.92	2.29083e-06	-2.09374e-06	-2.793e-06	-5.33257e-06	-6.09606e-06			1618.92	2.29083e-06	-6.09606e-06	-3.87915e-07	-4.4676e-06	-3.83638e-07	-7.64299e-06			1618.92	2.29083e-06	-6.09606e-06	1.21933e-06	1.90794e-06	-2.1435e-06	-3.94416e-06
1618.6	2.49393e-06	-1.79718e-06	-2.37772e-06	-4.84287e-06	-5.46697e-06			1618.6	2.49393e-06	-5.46697e-06	1.18863e-07	-3.61527e-06	2.94453e-07	-6.61189e-06			1618.6	2.49393e-06	-5.46697e-06	1.64591e-06	2.15304e-06	-1.54507e-06	-3.28176e-06
1618.28	2.69968e-06	-1.45264e-06	-1.9135e-06	-4.25027e-06	-4.72388e-06			1618.28	2.69968e-06	-4.72388e-06	6.36212e-07	-2.68238e-06	9.81379e-07	-5.43996e-06			1618.28	2.69968e-06	-4.72388e-06	2.04902e-06	2.36933e-06	-9.15828e-07	-2.54674e-06
1617.96	2.91362e-06	-1.05991e-06	-1.40593e-06	-3.56618e-06	-3.88297e-06			1617.96	2.91362e-06	-3.88297e-06	1.17364e-06	-1.6835e-06	1.67536e-06	-4.15027e-06			1617.96	2.91362e-06	-3.88297e-06	2.43444e-06	2.5697e-06	-2.66837e-07	-1.75417e-06
1617.64	3.14086e-06	-6.20075e-07	-8.60961e-07	-2.80362e-06	-2.96216e-06			1617.64	3.14086e-06	-2.96216e-06	1.74068e-06	-6.31209e-07	2.37589e-06	-2.76782e-06			1617.64	3.14086e-06	-2.96216e-06	2.80892e-06	2.76674e-06	3.91796e-07	-9.1928e-07
1617.32	3.38654e-06	-1.34934e-07	-2.83732e-07	-1.97652e-06	-1.97943e-06			1617.32	3.38654e-06	-1.97943e-06	2.34574e-06	4.6305e-07	3.0838e-06	-1.31803e-06			1617.32	3.38654e-06	-1.97943e-06	3.18036e-06	2.97252e-06	1.0517e-06	-5.53628e-08
1616.99	3.65531e-06	3.92955e-07	3.20929e-07	-1.09924e-06	-9.52553e-07			1616.99	3.65531e-06	-9.52553e-07	2.99527e-06	1.58897e-06	3.8005e-06	1.73928e-07			1616.99	3.65531e-06	-9.52553e-07	3.55738e-06	3.19771e-06	1.70615e-06	8.25602e-07
1616.67	3.95133e-06	9.59933e-07	9.47795e-07	-1.86442e-07	1.00665e-07			1616.67	3.95133e-06	1.00665e-07	3.69274e-06	2.73606e-06	4.52712e-06	1.6833e-06			1616.67	3.95133e-06	1.00665e-07	3.94703e-06	3.44946e-06	2.34948e-06	1.71195e-06
1616.35	4.27772e-06	1.56142e-06	1.59126e-06	7.46724e-07	1.16278e-06			1616.35	4.27772e-06	1.16278e-06	4.43713e-06	3.89253e-06	5.26322e-06	3.18592e-06			1616.35	4.27772e-06	1.16278e-06	4.35395e-06	3.73224e-06	2.97702e-06	2.59303e-06
1616.03	4.6349e-06	2.19113e-06	2.24508e-06	1.68496e-06	2.21667e-06			1616.03	4.6349e-06	2.21667e-06	5.22284e-06	5.04475e-06	6.0064e-06	4.65885e-06			1616.03	4.6349e-06	2.21667e-06	4.78e-06	4.04702e-06	3.58495e-06	3.45742e-06
1615.71	5.02033e-06	2.84122e-06	2.90172e-06	2.61275e-06	3.24549e-06			1615.71	5.02033e-06	3.24549e-06	6.0392e-06	6.17786e-06	6.75146e-06	6.08051e-06			1615.71	5.02033e-06	3.24549e-06	5.22268e-06	4.39131e-06	4.16978e-06	4.29357e-06
1615.39	5.42824e-06	3.50252e-06	3.55329e-06	3.51514e-06	4.234e-06			1615.39	5.42824e-06	4.234e-06	6.87182e-06	7.27658e-06	7.4908e-06	7.43132e-06			1615.39	5.42824e-06	4.234e-06	5.676e-06	4.7592e-06	4.72863e-06	5.09031e-06
1615.07	5.84999e-06	4.16449e-06	4.19141e-06	4.3781e-06	5.16834e-06			1615.07	5.84999e-06	5.16834e-06	7.70311e-06	8.32588e-06	8.21458e-06	8.69421e-06			1615.07	5.84999e-06	5.16834e-06	6.13221e-06	5.14237e-06	5.25903e-06	5.8373e-06
1614.74	6.27448e-06	4.81603e-06	4.80778e-06	5.1891e-06	6.03676e-06			1614.74	6.27448e-06	6.03676e-06	8.51438e-06	9.31284e-06	8.91169e-06	9.85508e-06			1614.74	6.27448e-06	6.03676e-06	6.58232e-06	5.53236e-06	5.75882e-06	6.52674e-06
1614.42	6.68994e-06	5.44598e-06	5.39447e-06	5.93772e-06	6.83051e-06			1614.42	6.68994e-06	6.83051e-06	9.28702e-06	1.02267e-05	9.57067e-06	1.0903e-05			1614.42	6.68994e-06	6.83051e-06	7.01862e-06	5.92033e-06	6.22643e-06	7.15329e-06
1614.1	7.08497e-06	6.04415e-06	5.94492e-06	6.61621e-06	7.54386e-06			1614.1	7.08497e-06	7.54386e-06	1.00046e-05	1.10598e-05	1.01811e-05	1.18304e-05			1614.1	7.08497e-06	7.54386e-06	7.43503e-06	6.29832e-06	6.66036e-06	7.71492e-06
1613.78	7.44932e-06	6.60179e-06	6.45327e-06	7.21967e-06	8.17385e-06			1613.78	7.44932e-06	8.17385e-06	1.06539e-05	1.18067e-05	1.07339e-05	1.26332e-05			1613.78	7.44932e-06	8.17385e-06	7.82766e-06	6.65831e-06	7.05916e-06	8.21202e-06
1613.46	7.77619e-06	7.11245e-06	6.91562e-06	7.74621e-06	8.72077e-06			1613.46	7.77619e-06	8.72077e-06	1.12258e-05	1.24648e-05	1.12226e-05	1.33111e-05			1613.46	7.77619e-06	8.72077e-06	8.19493e-06	6.99525e-06	7.42202e-06	8.64738e-06
1613.14	8.06075e-06	7.57138e-06	7.32902e-06	8.19621e-06	9.18643e-06			1613.14	8.06075e-06	9.18643e-06	1.17149e-05	1.30317e-05	1.16422e-05	1.38663e-05			1613.14	8.06075e-06	9.18643e-06	8.53536e-06	7.304e-06	7.74759e-06	9.02412e-06
1612.82	8.30084e-06	7.97552e-06	7.69145e-06	8.57163e-06	9.57384e-06			1612.82	8.30084e-06	9.57384e-06	1.21191e-05	1.35055e-05	1.19892e-05	1.43025e-05			1612.82	8.30084e-06	9.57384e-06	8.84772e-06	7.58048e-06	8.03479e-06	9.34525e-06
1612.49	8.49567e-06	8.32265e-06	8.00115e-06	8.87442e-06	9.88546e-06			1612.49	8.49567e-06	9.88546e-06	1.24376e-05	1.3883e-05	1.22611e-05	1.46237e-05			1612.49	8.49567e-06	9.88546e-06	9.12867e-06	7.82091e-06	8.28181e-06	9.61146e-06
1612.17	8.64434e-06	8.61096e-06	8.25618e-06	9.10596e-06	1.01223e-05			1612.17	8.64434e-06	1.01223e-05	1.26706e-05	1.41602e-05	1.24551e-05	1.48332e-05			1612.17	8.64434e-06	1.01223e-05	9.37317e-06	8.02261e-06	8.48574e-06	9.82141e-06
1611.85	8.74663e-06	8.83847e-06	8.4549e-06	9.26693e-06	1.0285e-05			1611.85	8.74663e-06	1.0285e-05	1.28189e-05	1.43328e-05	1.25693e-05	1.49336e-05			1611.85	8.74663e-06	1.0285e-05	9.57434e-06	8.18386e-06	8.64408e-06	9.97276e-06
1611.53	8.80262e-06	9.00353e-06	8.59589e-06	9.35731e-06	1.03733e-05			1611.53	8.80262e-06	1.03733e-05	1.28834e-05	1.43981e-05	1.26023e-05	1.49271e-05			1611.53	8.80262e-06	1.03733e-05	9.72537e-06	8.30426e-06	8.75385e-06	1.00623e-05
1611.21	8.81269e-06	9.10527e-06	8.67869e-06	9.37759e-06	1.03872e-05			1611.21	8.81269e-06	1.03872e-05	1.28666e-05	1.43558e-05	1.25547e-05	1.48162e-05			1611.21	8.81269e-06	1.03872e-05	9.8205e-06	8.38491e-06	8.81296e-06	1.00884e-05
1610.89	8.77897e-06	9.14388e-06	8.70375e-06	9.32924e-06	1.03282e-05			1610.89	8.77897e-06	1.03282e-05	1.27721e-05	1.42094e-05	1.2429e-05	1.46046e-05			1610.89	8.77897e-06	1.03282e-05	9.856e-06	8.42838e-06	8.82059e-06	1.00511e-05
1610.57	8.70493e-06	9.12129e-06	8.67318e-06	9.21536e-06	1.01997e-05			1610.57	8.70493e-06	1.01997e-05	1.26051e-05	1.39652e-05	1.22298e-05	1.42977e-05			1610.57	8.70493e-06	1.01997e-05	9.83211e-06	8.43843e-06	8.77707e-06	9.95306e-06
1610.25	8.59438e-06	9.03995e-06	8.5889e-06	9.03983e-06	1.00053e-05			1610.25	8.59438e-06	1.00053e-05	1.23709e-05	1.36311e-05	1.19619e-05	1.39016e-05			1610.25	8.59438e-06	1.00053e-05	9.74934e-06	8.41649e-06	8.68301e-06	9.79756e-06
1609.92	8.45043e-06	8.90288e-06	8.45277e-06	8.80731e-06	9.74926e-06			1609.92	8.45043e-06	9.74926e-06	1.20745e-05	1.32151e-05	1.16305e-05	1.34231e-05			1609.92	8.45043e-06	9.74926e-06	9.61059e-06	8.36191e-06	8.53936e-06	9.58814e-06
1609.6	8.27444e-06	8.71282e-06	8.26663e-06	8.52218e-06	9.43527e-06			1609.6	8.27444e-06	9.43527e-06	1.17197e-05	1.27244e-05	1.12393e-05	1.28683e-05			1609.6	8.27444e-06	9.43527e-06	9.41831e-06	8.27146e-06	8.3464e-06	9.32755e-06
1609.28	8.06512e-06	8.47164e-06	8.03101e-06	8.18842e-06	9.06634e-06			1609.28	8.06512e-06	9.06634e-06	1.13085e-05	1.21635e-05	1.07903e-05	1.22432e-05			1609.28	8.06512e-06	9.06634e-06	9.17398e-06	8.13916e-06	8.10383e-06	9.01638e-06
1608.96	7.81937e-06	8.18029e-06	7.74621e-06	7.80921e-06	8.64499e-06			1608.96	7.81937e-06	8.64499e-06	1.08412e-05	1.15363e-05	1.02843e-05	1.15534e-05			1608.96	7.81937e-06	8.64499e-06	8.87781e-06	7.95678e-06	7.81035e-06	8.65348e-06
1608.64	7.5326e-06	7.83899e-06	7.41256e-06	7.38744e-06	8.17385e-06			1608.64	7.5326e-06	8.17385e-06	1.0317e-05	1.0846e-05	9.72123e-06	1.08047e-05			1608.64	7.5326e-06	8.17385e-06	8.52853e-06	7.71665e-06	7.46484e-06	8.23734e-06
1608.32	7.19945e-06	7.44745e-06	7.03083e-06	6.9262e-06	7.65649e-06			1608.32	7.19945e-06	7.65649e-06	9.73491e-06	1.00967e-05	9.10121e-06	1.0004e-05			1608.32	7.19945e-06	7.65649e-06	8.12476e-06	7.41226e-06	7.06655e-06	7.76583e-06
1608	6.81544e-06	7.00574e-06	6.60234e-06	6.42913e-06	7.09773e-06			1608	6.81544e-06	7.09773e-06	9.09426e-06	9.29423e-06	8.42534e-06	9.15915e-06			1608	6.81544e-06	7.09773e-06	7.66514e-06	7.03962e-06	6.61591e-06	7.23884e-06
1607.67	6.3784e-06	6.51501e-06	6.12986e-06	5.90127e-06	6.50458e-06			1607.67	6.3784e-06	6.50458e-06	8.39621e-06	8.44705e-06	7.69665e-06	8.28015e-06			1607.67	6.3784e-06	6.50458e-06	7.1509e-06	6.59962e-06	6.11478e-06	6.65892e-06
1607.35	5.88823e-06	5.9774e-06	5.61646e-06	5.34868e-06	5.88539e-06			1607.35	5.88823e-06	5.88539e-06	7.64389e-06	7.56522e-06	6.92016e-06	7.37789e-06			1607.35	5.88823e-06	5.88539e-06	6.58482e-06	6.09666e-06	5.56694e-06	6.03147e-06
1607.03	5.34777e-06	5.39698e-06	5.06679e-06	4.77886e-06	5.24972e-06			1607.03	5.34777e-06	5.24972e-06	6.84326e-06	6.66105e-06	6.10321e-06	6.46518e-06			1607.03	5.34777e-06	5.24972e-06	5.9726e-06	5.5394e-06	4.97821e-06	5.36537e-06
1606.71	4.76365e-06	4.77968e-06	4.48677e-06	4.2007e-06	4.60842e-06			1606.71	4.76365e-06	4.60842e-06	6.00304e-06	5.74799e-06	5.25531e-06	5.5557e-06			1606.71	4.76365e-06	4.60842e-06	5.32309e-06	4.93943e-06	4.35651e-06	4.6723e-06
1606.39	4.14469e-06	4.13299e-06	3.88362e-06	3.62381e-06	3.97197e-06			1606.39	4.14469e-06	3.97197e-06	5.1346e-06	4.84032e-06	4.38763e-06	4.66401e-06			1606.39	4.14469e-06	3.97197e-06	4.64625e-06	4.309e-06	3.71127e-06	3.96572e-06
1606.07	3.50264e-06	3.46617e-06	3.26605e-06	3.05847e-06	3.35116e-06			1606.07	3.50264e-06	3.35116e-06	4.25153e-06	3.95266e-06	3.51284e-06	3.80514e-06			1606.07	3.50264e-06	3.35116e-06	3.95346e-06	3.66146e-06	3.05344e-06	3.26063e-06
1605.75	2.85076e-06	2.78976e-06	2.64415e-06	2.51499e-06	2.75568e-06			1605.75	2.85076e-06	2.75568e-06	3.36858e-06	3.09969e-06	2.6446e-06	2.99396e-06			1605.75	2.85076e-06	2.75568e-06	3.25531e-06	3.00905e-06	2.39476e-06	2.57168e-06
1605.42	2.20251e-06	2.115e-06	2.02903e-06	2.00308e-06	2.19456e-06			1605.42	2.20251e-06	2.19456e-06	2.50043e-06	2.29594e-06	1.79694e-06	2.24467e-06			1605.42	2.20251e-06	2.19456e-06	2.56135e-06	2.36226e-06	1.74761e-06	1.91284e-06
1605.1	1.57082e-06	1.45427e-06	1.43272e-06	1.53171e-06	1.67632e-06			1605.1	1.57082e-06	1.67632e-06	1.66184e-06	1.55525e-06	9.84923e-07	1.57039e-06			1605.1	1.57082e-06	1.67632e-06	1.88065e-06	1.73147e-06	1.12436e-06	1.29746e-06
1604.78	9.67218e-07	8.20271e-07	8.67147e-07	1.10843e-06	1.20824e-06			1604.78	9.67218e-07	1.20824e-06	8.66481e-07	8.90153e-07	2.23473e-07	9.82257e-07			1604.78	9.67218e-07	1.20824e-06	1.22096e-06	1.12601e-06	5.37082e-07	7.37057e-07
1604.46	4.01446e-07	2.25985e-07	3.4401e-07	7.39613e-07	7.97291e-07			1604.46	4.01446e-07	7.97291e-07	1.27039e-07	3.11765e-07	-4.72376e-07	4.88916e-07			1604.46	4.01446e-07	7.97291e-07	5.90469e-07	5.55526e-07	-2.41755e-09	2.41868e-07
1604.14	-1.17653e-07	-3.15741e-07	-1.25681e-07	4.30184e-07	4.49805e-07			1604.14	-1.17653e-07	4.49805e-07	-5.4483e-07	-1.70764e-07	-1.08812e-06	9.64596e-08			1604.14	-1.17653e-07	4.49805e-07	-2.04909e-09	2.94922e-08	-4.82633e-07	-1.78721e-07
1603.82	-5.82555e-07	-7.92968e-07	-5.32683e-07	1.83434e-07	1.7067e-07			1603.82	-5.82555e-07	1.7067e-07	-1.13852e-06	-5.5116e-07	-1.61086e-06	-1.92593e-07			1603.82	-5.82555e-07	1.7067e-07	-5.464e-07	-4.41795e-07	-8.93262e-07	-5.17644e-07
1603.5	-9.86059e-07	-1.19543e-06	-8.69716e-07	9.99279e-10	-3.69677e-08			1603.5	-9.86059e-07	-3.69677e-08	-1.64497e-06	-8.26278e-07	-2.02987e-06	-3.788e-07			1603.5	-9.86059e-07	-3.69677e-08	-1.03206e-06	-8.49977e-07	-1.22545e-06	-7.69773e-07
1603.17	-1.32131e-06	-1.51526e-06	-1.13136e-06	-1.17202e-07	-1.71943e-07			1603.17	-1.32131e-06	-1.71943e-07	-2.05648e-06	-9.96608e-07	-2.33764e-06	-4.6584e-07			1603.17	-1.32131e-06	-1.71943e-07	-1.44826e-06	-1.18676e-06	-1.47237e-06	-9.33058e-07
1602.85	-1.58308e-06	-1.74765e-06	-1.31513e-06	-1.73071e-07	-2.36141e-07			1602.85	-1.58308e-06	-2.36141e-07	-2.3675e-06	-1.06666e-06	-2.53065e-06	-4.60501e-07			1602.85	-1.58308e-06	-2.36141e-07	-1.78595e-06	-1.44778e-06	-1.6305e-06	-1.00909e-06
1602.53	-1.76788e-06	-1.89115e-06	-1.42083e-06	-1.7053e-07	-2.337e-07			1602.53	-1.76788e-06	-2.337e-07	-2.57501e-06	-1.04375e-06	-2.60925e-06	-3.71981e-07			1602.53	-1.76788e-06	-2.337e-07	-2.03832e-06	-1.63149e-06	-1.69956e-06	-1.00223e-06
1602.21	-1.8748e-06	-1.94768e-06	-1.45075e-06	-1.15271e-07	-1.71184e-07			1602.21	-1.8748e-06	-1.71184e-07	-2.67837e-06	-9.38679e-07	-2.57775e-06	-2.11301e-07			1602.21	-1.8748e-06	-1.71184e-07	-2.20156e-06	-1.73992e-06	-1.68307e-06	-9.20832e-07
1601.89	-1.90559e-06	-1.92226e-06	-1.40867e-06	-1.43247e-08	-5.68477e-08			1601.89	-1.90559e-06	-5.68477e-08	-2.67984e-06	-7.6351e-07	-2.44391e-06	8.96193e-09			1601.89	-1.90559e-06	-5.68477e-08	-2.2759e-06	-1.77718e-06	-1.58806e-06	-7.75568e-07
1601.57	-1.86533e-06	-1.82243e-06	-1.30103e-06	1.23951e-07	9.96631e-08			1601.57	-1.86533e-06	9.96631e-08	-2.58446e-06	-5.32184e-07	-2.21866e-06	2.75311e-07			1601.57	-1.86533e-06	9.96631e-08	-2.26545e-06	-1.7509e-06	-1.4244e-06	-5.79003e-07
1601.25	-1.761e-06	-1.65768e-06	-1.13569e-06	2.90444e-07	2.88055e-07			1601.25	-1.761e-06	2.88055e-07	-2.40025e-06	-2.58709e-07	-1.91523e-06	5.73607e-07			1601.25	-1.761e-06	2.88055e-07	-2.17701e-06	-1.66977e-06	-1.20428e-06	-3.44718e-07
1600.92	-1.60094e-06	-1.43829e-06	-9.21826e-07	4.7608e-07	4.98307e-07			1600.92	-1.60094e-06	4.98307e-07	-2.13702e-06	4.36251e-08	-1.54815e-06	8.90198e-07			1600.92	-1.60094e-06	4.98307e-07	-2.01948e-06	-1.54192e-06	-9.40383e-07	-8.55166e-08
1600.6	-1.39352e-06	-1.17506e-06	-6.69868e-07	6.72154e-07	7.21138e-07			1600.6	-1.39352e-06	7.21138e-07	-1.80672e-06	3.62687e-07	-1.13288e-06	1.21222e-06			1600.6	-1.39352e-06	7.21138e-07	-1.8024e-06	-1.37517e-06	-6.45277e-07	1.86849e-07
1600.28	-1.14632e-06	-8.78318e-07	-3.90446e-07	8.71025e-07	9.48714e-07			1600.28	-1.14632e-06	9.48714e-07	-1.42171e-06	6.87958e-07	-6.84783e-07	1.52865e-06			1600.28	-1.14632e-06	9.48714e-07	-1.53463e-06	-1.17532e-06	-3.30598e-07	4.62975e-07
1599.96	-8.66003e-07	-5.57887e-07	-9.41762e-08	1.0662e-06	1.17407e-06			1599.96	-8.66003e-07	1.17407e-06	-9.94868e-07	1.01083e-06	-2.18713e-07	1.83068e-06			1599.96	-8.66003e-07	1.17407e-06	-1.22482e-06	-9.46494e-07	-6.61066e-09	7.3584e-07
1599.64	-5.58815e-07	-2.23283e-07	2.08746e-07	1.25238e-06	1.39151e-06			1599.64	-5.58815e-07	1.39151e-06	-5.38852e-07	1.32418e-06	2.5158e-07	2.11147e-06			1599.64	-5.58815e-07	1.39151e-06	-8.80826e-07	-6.92754e-07	3.17828e-07	1.00017e-06
1599.32	-2.30707e-07	1.16935e-07	5.09601e-07	1.42555e-06	1.59609e-06			1599.32	-2.30707e-07	1.59609e-06	-6.61905e-08	1.62251e-06	7.13281e-07	2.36681e-06			1599.32	-2.30707e-07	1.59609e-06	-5.10022e-07	-4.17085e-07	6.34796e-07	1.25264e-06
1599	1.11279e-07	4.54448e-07	8.00426e-07	1.58258e-06	1.78321e-06			1599	1.11279e-07	1.78321e-06	4.10708e-07	1.90054e-06	1.15498e-06	2.59368e-06			1599	1.11279e-07	1.78321e-06	-1.21172e-07	-1.24659e-07	9.37173e-07	1.49008e-06
1598.67	4.59417e-07	7.81483e-07	1.07515e-06	1.72109e-06	1.94867e-06			1598.67	4.59417e-07	1.94867e-06	8.79841e-07	2.15456e-06	1.56699e-06	2.79052e-06			1598.67	4.59417e-07	1.94867e-06	2.76545e-07	1.77683e-07	1.21871e-06	1.70999e-06
1598.35	8.05417e-07	1.09148e-06	1.32888e-06	1.83959e-06	2.08938e-06			1598.35	8.05417e-07	2.08938e-06	1.32984e-06	2.38122e-06	1.94149e-06	2.95689e-06			1598.35	8.05417e-07	2.08938e-06	6.72894e-07	4.81991e-07	1.47404e-06	1.91016e-06
1598.03	1.1396e-06	1.37868e-06	1.55776e-06	1.93726e-06	2.20257e-06			1598.03	1.1396e-06	2.20257e-06	1.74989e-06	2.57795e-06	2.27254e-06	3.09249e-06			1598.03	1.1396e-06	2.20257e-06	1.05611e-06	7.79161e-07	1.69874e-06	2.08821e-06
1597.71	1.45325e-06	1.6388e-06	1.75932e-06	2.01409e-06	2.28798e-06			1597.71	1.45325e-06	2.28798e-06	2.13037e-06	2.74356e-06	2.55633e-06	3.19767e-06			1597.71	1.45325e-06	2.28798e-06	1.41529e-06	1.0609e-06	1.89036e-06	2.24234e-06
1597.39	1.73804e-06	1.86881e-06	1.93154e-06	2.07082e-06	2.34654e-06			1597.39	1.73804e-06	2.34654e-06	2.46342e-06	2.87716e-06	2.79088e-06	3.27269e-06			1597.39	1.73804e-06	2.34654e-06	1.73988e-06	1.32035e-06	2.04725e-06	2.37101e-06
1597.07	1.98788e-06	2.06699e-06	2.07358e-06	2.10886e-06	2.38086e-06			1597.07	1.98788e-06	2.38086e-06	2.74339e-06	2.97951e-06	2.97601e-06	3.31818e-06			1597.07	1.98788e-06	2.38086e-06	2.02194e-06	1.55376e-06	2.16983e-06	2.47403e-06
1596.75	2.19933e-06	2.23285e-06	2.18582e-06	2.1304e-06	2.39546e-06			1596.75	2.19933e-06	2.39546e-06	2.96735e-06	3.0529e-06	3.11335e-06	3.33535e-06			1596.75	2.19933e-06	2.39546e-06	2.25748e-06	1.76125e-06	2.26023e-06	2.55215e-06
1596.42	2.37153e-06	2.36676e-06	2.26958e-06	2.13791e-06	2.39502e-06			1596.42	2.37153e-06	2.39502e-06	3.13513e-06	3.10057e-06	3.20571e-06	3.3262e-06			1596.42	2.37153e-06	2.39502e-06	2.4453e-06	1.94413e-06	2.32146e-06	2.60739e-06
1596.1	2.50608e-06	2.46969e-06	2.32723e-06	2.13406e-06	2.38442e-06			1596.1	2.50608e-06	2.38442e-06	3.24944e-06	3.12674e-06	3.25699e-06	3.29371e-06			1596.1	2.50608e-06	2.38442e-06	2.58811e-06	2.10611e-06	2.35746e-06	2.64203e-06
1595.78	2.60633e-06	2.54328e-06	2.36188e-06	2.12138e-06	2.36743e-06			1595.78	2.60633e-06	2.36743e-06	3.31462e-06	3.13543e-06	3.27181e-06	3.24138e-06			1595.78	2.60633e-06	2.36743e-06	2.68981e-06	2.25011e-06	2.37219e-06	2.65886e-06
1595.46	2.67586e-06	2.58922e-06	2.37703e-06	2.10199e-06	2.34656e-06			1595.46	2.67586e-06	2.34656e-06	3.33654e-06	3.12992e-06	3.25499e-06	3.17329e-06			1595.46	2.67586e-06	2.34656e-06	2.75546e-06	2.377e-06	2.3696e-06	2.66024e-06
1595.14	2.71829e-06	2.60969e-06	2.37579e-06	2.07743e-06	2.32273e-06			1595.14	2.71829e-06	2.32273e-06	3.32142e-06	3.11222e-06	3.21128e-06	3.09339e-06			1595.14	2.71829e-06	2.32273e-06	2.78927e-06	2.48575e-06	2.35268e-06	2.64784e-06
1594.82	2.73616e-06	2.60694e-06	2.36085e-06	2.04839e-06	2.29558e-06			1594.82	2.73616e-06	2.29558e-06	3.27516e-06	3.08268e-06	3.14503e-06	3.00528e-06			1594.82	2.73616e-06	2.29558e-06	2.79435e-06	2.57242e-06	2.32385e-06	2.62308e-06
1594.5	2.7316e-06	2.5832e-06	2.33415e-06	2.01509e-06	2.26361e-06			1594.5	2.7316e-06	2.26361e-06	3.20323e-06	3.04003e-06	3.05989e-06	2.9116e-06			1594.5	2.7316e-06	2.26361e-06	2.7724e-06	2.63182e-06	2.28469e-06	2.58623e-06
1594.17	2.70579e-06	2.54093e-06	2.297e-06	1.97729e-06	2.22499e-06			1594.17	2.70579e-06	2.22499e-06	3.11033e-06	2.98255e-06	2.95899e-06	2.81428e-06			1594.17	2.70579e-06	2.22499e-06	2.72423e-06	2.65958e-06	2.23654e-06	2.53765e-06
1593.85	2.66072e-06	2.48304e-06	2.25005e-06	1.93467e-06	2.17817e-06			1593.85	2.66072e-06	2.17817e-06	3.00099e-06	2.90838e-06	2.84525e-06	2.71486e-06			1593.85	2.66072e-06	2.17817e-06	2.65184e-06	2.65324e-06	2.18069e-06	2.4781e-06
1593.53	2.59944e-06	2.41252e-06	2.19436e-06	1.88717e-06	2.12286e-06			1593.53	2.59944e-06	2.12286e-06	2.87948e-06	2.8173e-06	2.72179e-06	2.61484e-06			1593.53	2.59944e-06	2.12286e-06	2.55841e-06	2.61523e-06	2.11886e-06	2.40886e-06
1593.21	2.52626e-06	2.33297e-06	2.13094e-06	1.83527e-06	2.05995e-06			1593.21	2.52626e-06	2.05995e-06	2.75052e-06	2.71118e-06	2.59189e-06	2.51565e-06			1593.21	2.52626e-06	2.05995e-06	2.44917e-06	2.55154e-06	2.05331e-06	2.33219e-06
1592.89	2.44624e-06	2.24752e-06	2.06117e-06	1.77967e-06	1.99108e-06			1592.89	2.44624e-06	1.99108e-06	2.61828e-06	2.59324e-06	2.45883e-06	2.41842e-06			1592.89	2.44624e-06	1.99108e-06	2.33003e-06	2.47133e-06	1.98607e-06	2.25053e-06
1592.57	2.36411e-06	2.15914e-06	1.98684e-06	1.72139e-06	1.91879e-06			1592.57	2.36411e-06	1.91879e-06	2.48649e-06	2.46772e-06	2.3257e-06	2.32389e-06			1592.57	2.36411e-06	1.91879e-06	2.2079e-06	2.38386e-06	1.91878e-06	2.16615e-06
1592.25	2.28312e-06	2.07009e-06	1.90925e-06	1.6613e-06	1.84469e-06			1592.25	2.28312e-06	1.84469e-06	2.35736e-06	2.33875e-06	2.19479e-06	2.23183e-06			1592.25	2.28312e-06	1.84469e-06	2.0875e-06	2.29756e-06	1.85238e-06	2.08096e-06
1591.93	2.20525e-06	1.98164e-06	1.82968e-06	1.60007e-06	1.77062e-06			1591.93	2.20525e-06	1.77062e-06	2.23231e-06	2.20981e-06	2.06787e-06	2.14145e-06			1591.93	2.20525e-06	1.77062e-06	1.97315e-06	2.21734e-06	1.787e-06	1.99561e-06
1591.6	2.12986e-06	1.89452e-06	1.74905e-06	1.53794e-06	1.69679e-06			1591.6	2.12986e-06	1.69679e-06	2.11085e-06	2.08271e-06	1.94544e-06	2.05113e-06			1591.6	2.12986e-06	1.69679e-06	1.86598e-06	2.14435e-06	1.72175e-06	1.91009e-06
1591.28	2.05477e-06	1.80849e-06	1.66762e-06	1.47482e-06	1.6229e-06			1591.28	2.05477e-06	1.6229e-06	1.9919e-06	1.9575e-06	1.82779e-06	1.95925e-06			1591.28	2.05477e-06	1.6229e-06	1.76546e-06	2.07461e-06	1.65584e-06	1.82353e-06
1590.96	1.97785e-06	1.72316e-06	1.58555e-06	1.41059e-06	1.54802e-06			1590.96	1.97785e-06	1.54802e-06	1.87408e-06	1.83347e-06	1.71461e-06	1.86462e-06			1590.96	1.97785e-06	1.54802e-06	1.67061e-06	2.00338e-06	1.58842e-06	1.73513e-06
1590.64	1.89659e-06	1.638e-06	1.50253e-06	1.34493e-06	1.47096e-06			1590.64	1.89659e-06	1.47096e-06	1.75598e-06	1.70923e-06	1.60553e-06	1.76673e-06			1590.64	1.89659e-06	1.47096e-06	1.57906e-06	1.92477e-06	1.5189e-06	1.64428e-06
1590.32	1.80961e-06	1.55232e-06	1.41863e-06	1.27764e-06	1.39099e-06			1590.32	1.80961e-06	1.39099e-06	1.637e-06	1.58384e-06	1.50017e-06	1.66549e-06			1590.32	1.80961e-06	1.39099e-06	1.48953e-06	1.83487e-06	1.44696e-06	1.551e-06
1590	1.71708e-06	1.46565e-06	1.33399e-06	1.20865e-06	1.30808e-06			1590	1.71708e-06	1.30808e-06	1.51742e-06	1.45759e-06	1.39789e-06	1.56152e-06			1590	1.71708e-06	1.30808e-06	1.40138e-06	1.73244e-06	1.37253e-06	1.45518e-06
1589.68	1.61951e-06	1.37744e-06	1.24883e-06	1.1381e-06	1.22223e-06			1589.68	1.61951e-06	1.22223e-06	1.39814e-06	1.33136e-06	1.29802e-06	1.45562e-06			1589.68	1.61951e-06	1.22223e-06	1.31407e-06	1.61778e-06	1.29506e-06	1.3577e-06
1589.35	1.51818e-06	1.28762e-06	1.16398e-06	1.06623e-06	1.13417e-06			1589.35	1.51818e-06	1.13417e-06	1.28103e-06	1.20757e-06	1.20008e-06	1.34848e-06			1589.35	1.51818e-06	1.13417e-06	1.2284e-06	1.494e-06	1.21435e-06	1.25948e-06
1589.03	1.41464e-06	1.19639e-06	1.08018e-06	9.93468e-07	1.04474e-06			1589.03	1.41464e-06	1.04474e-06	1.16821e-06	1.08919e-06	1.10322e-06	1.24117e-06			1589.03	1.41464e-06	1.04474e-06	1.14444e-06	1.36384e-06	1.12967e-06	1.16115e-06
1588.71	1.3096e-06	1.10401e-06	9.97992e-07	9.20367e-07	9.54906e-07			1588.71	1.3096e-06	9.54906e-07	1.06147e-06	9.78695e-07	1.00678e-06	1.13473e-06			1588.71	1.3096e-06	9.54906e-07	1.06165e-06	1.2287e-06	1.04036e-06	1.06303e-06
1588.39	1.20404e-06	1.01141e-06	9.18015e-07	8.47664e-07	8.65855e-07			1588.39	1.20404e-06	8.65855e-07	9.62381e-07	8.78362e-07	9.10633e-07	1.03044e-06			1588.39	1.20404e-06	8.65855e-07	9.79245e-07	1.091e-06	9.46507e-07	9.65859e-07
1588.07	1.09886e-06	9.19488e-07	8.40229e-07	7.75885e-07	7.78079e-07			1588.07	1.09886e-06	7.78079e-07	8.71256e-07	7.88994e-07	8.14883e-07	9.29555e-07			1588.07	1.09886e-06	7.78079e-07	8.95662e-07	9.50313e-07	8.48411e-07	8.69744e-07
1587.75	9.94377e-07	8.29267e-07	7.64489e-07	7.05597e-07	6.92262e-07			1587.75	9.94377e-07	6.92262e-07	7.87541e-07	7.10115e-07	7.20106e-07	8.337e-07			1587.75	9.94377e-07	6.92262e-07	8.09246e-07	8.06612e-07	7.47352e-07	7.7503e-07
1587.43	8.92689e-07	7.42254e-07	6.9096e-07	6.37812e-07	6.09477e-07			1587.43	8.92689e-07	6.09477e-07	7.10594e-07	6.40948e-07	6.27618e-07	7.4433e-07			1587.43	8.92689e-07	6.09477e-07	7.19185e-07	6.62165e-07	6.45721e-07	6.82561e-07
1587.1	7.95704e-07	6.59776e-07	6.20028e-07	5.73426e-07	5.30979e-07			1587.1	7.95704e-07	5.30979e-07	6.39551e-07	5.80142e-07	5.39254e-07	6.62949e-07			1587.1	7.95704e-07	5.30979e-07	6.25978e-07	5.19461e-07	5.46717e-07	5.94359e-07
1586.78	7.06088e-07	5.83626e-07	5.52829e-07	5.13773e-07	4.58696e-07			1586.78	7.06088e-07	4.58696e-07	5.74695e-07	5.27137e-07	4.57535e-07	5.91102e-07			1586.78	7.06088e-07	4.58696e-07	5.31868e-07	3.8388e-07	4.54278e-07	5.12831e-07
1586.46	6.26843e-07	5.15759e-07	4.90701e-07	4.60138e-07	3.95011e-07			1586.46	6.26843e-07	3.95011e-07	5.16855e-07	4.81635e-07	3.85272e-07	5.30458e-07			1586.46	6.26843e-07	3.95011e-07	4.40343e-07	2.6249e-07	3.72409e-07	4.40926e-07
1586.14	5.61568e-07	4.58519e-07	4.35939e-07	4.14381e-07	3.43039e-07			1586.14	5.61568e-07	3.43039e-07	4.68629e-07	4.45728e-07	3.25841e-07	4.83009e-07			1586.14	5.61568e-07	3.43039e-07	3.57074e-07	1.63807e-07	3.05154e-07	3.82623e-07
1585.82	5.12325e-07	4.13823e-07	3.90527e-07	3.78037e-07	3.0558e-07			1585.82	5.12325e-07	3.0558e-07	4.32577e-07	4.21654e-07	2.82223e-07	4.50183e-07			1585.82	5.12325e-07	3.0558e-07	2.87061e-07	9.49194e-08	2.5547e-07	3.40844e-07
1585.5	4.80563e-07	3.83409e-07	3.56126e-07	3.52557e-07	2.85032e-07			1585.5	4.80563e-07	2.85032e-07	4.11395e-07	4.11798e-07	2.56795e-07	4.32687e-07			1585.5	4.80563e-07	2.85032e-07	2.35155e-07	6.09448e-08	2.24816e-07	3.17631e-07
1585.18	4.66265e-07	3.68113e-07	3.33801e-07	3.38798e-07	2.8262e-07			1585.18	4.66265e-07	2.8262e-07	4.06444e-07	4.18073e-07	2.50922e-07	4.30579e-07			1585.18	4.66265e-07	2.8262e-07	2.04032e-07	6.30807e-08	2.12921e-07	3.13563e-07
1584.85	4.6795e-07	3.68225e-07	3.23996e-07	3.37225e-07	2.98425e-07			1584.85	4.6795e-07	2.98425e-07	4.1785e-07	4.4116e-07	2.64839e-07	4.43189e-07			1584.85	4.6795e-07	2.98425e-07	1.95239e-07	9.88525e-08	2.18448e-07	3.27615e-07
1584.53	4.82888e-07	3.83162e-07	3.26438e-07	3.47561e-07	3.30646e-07			1584.53	4.82888e-07	3.30646e-07	4.44069e-07	4.79566e-07	2.97571e-07	4.69063e-07			1584.53	4.82888e-07	3.30646e-07	2.07842e-07	1.63029e-07	2.38781e-07	3.57363e-07
1584.21	5.08231e-07	4.11604e-07	3.4079e-07	3.69037e-07	3.76766e-07			1584.21	5.08231e-07	3.76766e-07	4.82823e-07	5.31212e-07	3.47351e-07	5.06753e-07			1584.21	5.08231e-07	3.76766e-07	2.4086e-07	2.48317e-07	2.7143e-07	3.99573e-07
1583.89	5.3996e-07	4.51647e-07	3.65891e-07	4.00296e-07	4.32549e-07			1583.89	5.3996e-07	4.32549e-07	5.30867e-07	5.92078e-07	4.11286e-07	5.54136e-07			1583.89	5.3996e-07	4.32549e-07	2.91359e-07	3.46854e-07	3.13623e-07	4.50509e-07
1583.57	5.74606e-07	5.00812e-07	4.00395e-07	4.39433e-07	4.93604e-07			1583.57	5.74606e-07	4.93604e-07	5.85102e-07	6.57851e-07	4.86248e-07	6.09448e-07			1583.57	5.74606e-07	4.93604e-07	3.56749e-07	4.51391e-07	3.63393e-07	5.06595e-07
1583.25	6.08972e-07	5.56343e-07	4.42833e-07	4.84435e-07	5.55551e-07			1583.25	6.08972e-07	5.55551e-07	6.42757e-07	7.24725e-07	5.6851e-07	6.70771e-07			1583.25	6.08972e-07	5.55551e-07	4.34176e-07	5.57037e-07	4.18939e-07	5.64744e-07
1582.93	6.40403e-07	6.1535e-07	4.91602e-07	5.33031e-07	6.14893e-07			1582.93	6.40403e-07	6.14893e-07	7.01473e-07	7.90233e-07	6.54534e-07	7.35882e-07			1582.93	6.40403e-07	6.14893e-07	5.20558e-07	6.60453e-07	4.78584e-07	6.22572e-07
1582.6	6.66932e-07	6.74999e-07	5.4493e-07	5.83e-07	6.69009e-07			1582.6	6.66932e-07	6.69009e-07	7.59506e-07	8.52607e-07	7.40649e-07	8.02553e-07			1582.6	6.66932e-07	6.69009e-07	6.12575e-07	7.5905e-07	5.40547e-07	6.7801e-07
1582.28	6.87122e-07	7.32589e-07	6.00945e-07	6.32499e-07	7.16399e-07			1582.28	6.87122e-07	7.16399e-07	8.15313e-07	9.1166e-07	8.23566e-07	8.68165e-07			1582.28	6.87122e-07	7.16399e-07	7.05852e-07	8.52076e-07	6.02691e-07	7.29651e-07
1581.96	7.00358e-07	7.8621e-07	6.58091e-07	6.80237e-07	7.57242e-07			1581.96	7.00358e-07	7.57242e-07	8.67586e-07	9.68098e-07	9.00851e-07	9.30581e-07			1581.96	7.00358e-07	7.57242e-07	7.96354e-07	9.37898e-07	6.62993e-07	7.77104e-07
1581.64	7.07034e-07	8.34534e-07	7.15038e-07	7.25397e-07	7.9266e-07			1581.64	7.07034e-07	7.9266e-07	9.15302e-07	1.02306e-06	9.70755e-07	9.87999e-07			1581.64	7.07034e-07	7.9266e-07	8.80163e-07	1.0157e-06	7.19717e-07	8.20351e-07
1581.32	7.08168e-07	8.7717e-07	7.70705e-07	7.67816e-07	8.24611e-07			1581.32	7.08168e-07	8.24611e-07	9.57567e-07	1.07744e-06	1.03235e-06	1.0397e-06			1581.32	7.08168e-07	8.24611e-07	9.54209e-07	1.08509e-06	7.71456e-07	8.60259e-07
1581	7.05266e-07	9.14222e-07	8.24746e-07	8.07869e-07	8.5597e-07			1581	7.05266e-07	8.5597e-07	9.93811e-07	1.13254e-06	1.08609e-06	1.08589e-06			1581	7.05266e-07	8.5597e-07	1.01736e-06	1.14603e-06	8.18484e-07	8.98449e-07
1580.68	7.00755e-07	9.47017e-07	8.77532e-07	8.46343e-07	8.89276e-07			1580.68	7.00755e-07	8.89276e-07	1.02414e-06	1.18925e-06	1.1333e-06	1.12764e-06			1580.68	7.00755e-07	8.89276e-07	1.07026e-06	1.20013e-06	8.61905e-07	9.37323e-07
1580.35	6.96302e-07	9.76832e-07	9.2913e-07	8.83957e-07	9.26629e-07			1580.35	6.96302e-07	9.26629e-07	1.049e-06	1.2477e-06	1.17543e-06	1.16628e-06			1580.35	6.96302e-07	9.26629e-07	1.11555e-06	1.24801e-06	9.03393e-07	9.78966e-07
1580.03	6.93193e-07	1.00558e-06	9.80336e-07	9.21754e-07	9.6993e-07			1580.03	6.93193e-07	9.6993e-07	1.06966e-06	1.30769e-06	1.21433e-06	1.20335e-06			1580.03	6.93193e-07	9.6993e-07	1.15636e-06	1.29076e-06	9.4552e-07	1.02564e-06
